# Supplementary material for: DFT study on ruthenium-catalyzedN-methylbenzamide-directed 1,4-addition of theorthoC–H bond to maleimideviaC–H/C–C activation
Source: Royal Society of Chemistry journal article supplement (doi:10.1039/d2qo01487d), 2022-01-01
Supplement: d2qo01487d1.pdf [file d2qo01487d1.pdf]

# DFT Study on Ruthenium-Catalyzed N-methylbenzamide-directed 1,4-Addition of the *Ortho* C-H Bond to Maleimide *via* C-H/C-C Activation

Zhi-Hao Wu and De-Cai Fang\*

College of Chemistry, Beijing Normal University, Beijing 100875, China

Email: [dcfang@bnu.edu.cn](mailto:dcfang@bnu.edu.cn)

**Figure S1.** Proposed mechanism for the ruthenium-catalyzed amide-directed *ortho* C-H activation and C-C coupling reaction, along with  $\Delta G(373\text{K}, \text{kcal mol}^{-1})$  and key geometric parameters ( $\text{\AA}$ ) determined at B3LYP-D3a+IDSCRF/TZP-DKH(-dfg)(middle, in blue) in DCE solution, and also  $\Delta G(373\text{K}, \text{kcal mol}^{-1})$  determined at B3LYP+IDSCRF/TZP-DKH(-dfg) (up, in black) and B3LYP-D3+IDSCRF/TZP-DKH(-dfg)(down, in purple) for comparison. .... s1

**Table S1.** The calculated total electronic energies, enthalpies, entropies and free energies in a.u., in the DCE solvent with the temperature of 373.15K, along with some of them in DMF or  $\text{CH}_3\text{CN}$  .... s2-s4

**Table S2** Coordinates of all stationary points **CAT+1a+2a**, computed at B3LYP-D3a+IDSCRF/ TZP-DKH(-dfg) level in DCE solvent .... s5-s20

**Table S3** Coordinates of all stationary points **CAT+1a+2a**, computed at B3LYP+IDSCRF/ TZP-DKH(-dfg) level in DCE solvent .... s21-s36

**Table S4** Coordinates of all stationary points **CAT+1a+2a**, computed at B3LYP-D3+IDSCRF/ TZP-DKH(-dfg) level in DCE solvent .... s37-s50

**Table S5** Coordinates of stationary points for the reaction of **CAT+DMF+1a** and **CAT+CH<sub>3</sub>CN+1a**, computed at B3LYP-D3a+IDSCRF/TZP-DKH(-dfg) level in DMF and  $\text{CH}_3\text{CN}$  solvent, respectively. .... s50-s58

**Table S6** Coordinates of the first transition state for **CAT-B+1a** and **CAT-O+1a**, Computed at B3LYP-D3a+IDSCRF/ TZP-DKH(-dfg) level in DCE solvent .... s58-s61

**Table S7** Frequencies of all stationary points for the overall catalytic cycle, computed at B3LYP-D3a+IDSCRF/TZP-DKH(-dfg) level, and some of them computed at B3LYP+IDSCRF/TZP-DKH(-dfg) and B3LYP-D3+IDSCRF/TZP-DKH(-dfg) .... s61-s88

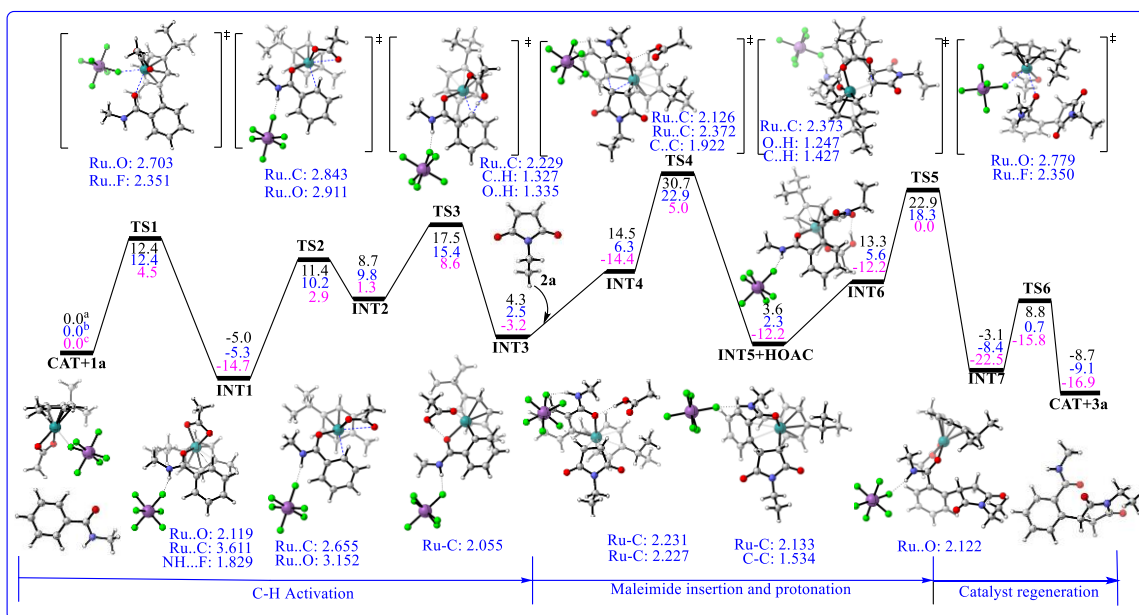

**Figure S1** Proposed mechanism for the ruthenium-catalyzed amide-directed ortho C–H activation and C–C coupling reaction, along with  $\Delta G(373\text{K}, \text{kcal mol}^{-1})$  and key geometric parameters ( $\text{\AA}$ ) determined at B3LYP-D3a+ IDSCRF/TZP-DKH(-dfg)(middle, in blue) in DCE solution, and also  $\Delta G(373\text{K}, \text{kcal mol}^{-1})$  determined at B3LYP+IDSCRF/TZP-DKH(-dfg) (up, in black) and B3LYP-D3+IDSCRF/TZP-DKH(-dfg) (down, in purple) for comparison.

**Table S1** The calculated total electronic energies, enthalpies, entropies and free energies in a.u. , in the DCE solvent with the temperature of 373.15K, along with some of them in DMF or CH<sub>3</sub>CN solvent

| Species     | $E_{\text{elec}}/\text{a.u.}$ | $H/\text{a.u.}$ | $S_g$ | $S_l$ | $G_g/\text{a.u.}$ | $G_l/\text{a.u.}$ |
|-------------|-------------------------------|-----------------|-------|-------|-------------------|-------------------|
| <b>DCE</b>  |                               |                 |       |       |                   |                   |
| <b>1a</b>   | -440.41980 <sup>a</sup>       | -440.24982      | 104.5 | 81.6  | -440.31196        | -440.29832        |
|             | -440.44477 <sup>b</sup>       | -440.27478      | 104.8 | 81.9  | -440.33710        | -440.32346        |
|             | -440.45292 <sup>c</sup>       | -440.28279      | 104.5 | 81.6  | -440.34494        | -440.33130        |
| <b>2a</b>   | -438.21638 <sup>a</sup>       | -438.07858      | 97.9  | 74.6  | -438.13682        | -438.12294        |
|             | -438.23675 <sup>b</sup>       | -438.09892      | 98.3  | 75.0  | -438.15738        | -438.14350        |
|             | -438.24248 <sup>c</sup>       | -438.10452      | 97.8  | 74.5  | -438.16269        | -438.14881        |
| <b>HOAc</b> | -229.18174 <sup>a</sup>       | -229.11324      | 73.2  | 52.6  | -229.15674        | -229.14454        |
|             | -229.18972 <sup>b</sup>       | -229.12124      | 73.1  | 52.6  | -229.16469        | -229.15176        |
|             | -229.18875 <sup>c</sup>       | -229.12022      | 73.0  | 52.5  | -229.16364        | -229.15144        |
| <b>3a</b>   | -878.66473 <sup>a</sup>       | -878.35295      | 160.4 | 138.2 | -878.44831        | -878.43512        |

|                                            |                                                                                     |                                              |                         |                         |                                              |                                              |
|--------------------------------------------|-------------------------------------------------------------------------------------|----------------------------------------------|-------------------------|-------------------------|----------------------------------------------|----------------------------------------------|
|                                            | -878.71454 <sup>b</sup><br>-878.73953 <sup>c</sup>                                  | -878.40249<br>-878.42725                     | 155.2<br>156.9          | 132.9<br>134.6          | -878.49476<br>-878.52054                     | -878.48154<br>-878.50730                     |
| <b>Pre-CAT</b>                             | -11421.81336 <sup>a</sup><br>-11421.90648                                           | -11421.33044<br>-11421.42319                 | 233.0<br>231.9          | 211.5<br>210.4          | -11421.46897<br>-11421.56107                 | -11421.45623<br>-11421.54831                 |
| <b>AgSbF<sub>6</sub></b>                   | -12042.26473 <sup>a</sup><br>-12042.27665 <sup>b</sup>                              | -12042.23550<br>-12042.24742                 | 119.2<br>115.7          | 93.7<br>90.3            | -12042.30635<br>-12042.31625                 | -12042.29121<br>-12042.30111                 |
| <b>(AgCl)<sub>4</sub></b>                  | -22480.50894 <sup>a</sup><br>-22480.54157 <sup>b</sup>                              | -22480.48247<br>-22480.51509                 | 146.3<br>146.0          | 120.5<br>120.3          | -22480.56945<br>-22480.60192                 | -22480.55414<br>-22480.58661                 |
| <b>CAT-(SbF<sub>6</sub>)<sub>2</sub></b>   | -18555.23767<br>-18555.29858                                                        | -18554.94781<br>-18555.00843                 | 233.9<br>231.4          | 212.0<br>209.5          | -18555.08689<br>-18555.14605                 | -18555.07386<br>-18555.13301                 |
| <b>Cu(OAc)<sub>2</sub>·H<sub>2</sub>O</b>  | -2171.04567 <sup>a</sup><br>-2171.06563 <sup>b</sup>                                | -2170.89879<br>-2170.91996                   | 143.1<br>143.9          | 119.5<br>120.2          | -2170.98390<br>-2171.00433                   | -2170.96985<br>-2170.99028                   |
| <b>CuOAcSbF<sub>6</sub>·H<sub>2</sub>O</b> | -8824.71737 <sup>a</sup><br>-8824.74128 <sup>b</sup>                                | -8824.60050<br>-8824.62439                   | 162.3<br>160.9          | 138.8<br>137.4          | -8824.69703<br>-8824.72006                   | -8824.68306<br>-8824.70610                   |
| <b>CAT-O</b>                               | -5247.95806 <sup>b</sup>                                                            | -5247.60751                                  | 178.3                   | 156.3                   | -5247.71351                                  | -5247.70044                                  |
| <b>CAT</b>                                 | -11901.58953 <sup>a</sup><br>-11901.64486 <sup>b</sup><br>-11901.67687 <sup>c</sup> | -11901.26920<br>-11901.32431<br>-11901.35614 | 204.7<br>203.7<br>205.9 | 182.8<br>181.8<br>183.9 | -11901.39092<br>-11901.44542<br>-11901.47855 | -11901.37791<br>-11901.43240<br>-11901.46551 |
| <b>TS1</b>                                 | -12342.00105 <sup>a</sup><br>-12342.08540 <sup>b</sup><br>-12342.13909 <sup>c</sup> | -12341.50934<br>-12341.59323<br>-12341.64634 | 268.6<br>261.7<br>262.5 | 247.3<br>240.3<br>241.1 | -12341.66908<br>-12341.74887<br>-12341.80245 | -12341.65639<br>-12341.73615<br>-12341.78969 |
| <b>INT1</b>                                | -12342.03030 <sup>a</sup><br>-12342.11225 <sup>b</sup><br>-12342.17249 <sup>c</sup> | -12341.53659<br>-12341.61842<br>-12341.67743 | 269.6<br>266.7<br>261.9 | 248.1<br>245.3<br>240.2 | -12341.69690<br>-12341.77699<br>-12341.83315 | -12341.68412<br>-12341.76428<br>-12341.82030 |
| <b>TS2</b>                                 | -12342.00233 <sup>a</sup><br>-12342.08601 <sup>b</sup><br>-12342.13993 <sup>c</sup> | -12341.51024<br>-12341.59357<br>-12341.64673 | 269.8<br>266.8<br>266.1 | 248.6<br>245.5<br>244.6 | -12341.67069<br>-12341.75222<br>-12341.80495 | -12341.65804<br>-12341.73956<br>-12341.79219 |
| <b>INT2</b>                                | -12342.00323 <sup>a</sup><br>-12342.08707 <sup>b</sup><br>-12342.14215 <sup>c</sup> | -12341.50958<br>-12341.59319<br>-12341.64774 | 270.2<br>268.6<br>268.7 | 248.9<br>247.3<br>247.2 | -12341.67026<br>-12341.75289<br>-12341.80750 | -12341.65761<br>-12341.74022<br>-12341.79475 |
| <b>TS3</b>                                 | -12341.99031 <sup>a</sup><br>-12342.07474 <sup>b</sup><br>-12342.12662 <sup>c</sup> | -12341.50271<br>-12341.58697<br>-12341.63825 | 266.1<br>264.0<br>264.8 | 244.8<br>242.8<br>243.5 | -12341.66097<br>-12341.74398<br>-12341.79571 | -12341.64829<br>-12341.73135<br>-12341.78307 |
| <b>INT3</b>                                | -12342.01553 <sup>a</sup><br>-12342.10074 <sup>b</sup><br>-12342.15225 <sup>c</sup> | -12341.52215<br>-12341.60679<br>-12341.65780 | 265.8<br>265.2<br>263.7 | 244.5<br>243.9<br>242.4 | -12341.68021<br>-12341.76448<br>-12341.81463 | -12341.66755<br>-12341.75182<br>-12341.80196 |
| <b>INT3 + 2a</b>                           | -12780.23191 <sup>a</sup><br>-12780.33749 <sup>b</sup><br>-12780.38900 <sup>c</sup> | -12779.60073<br>-12779.70571<br>-12779.76232 | 363.7<br>363.5<br>361.5 | 319.1<br>318.9<br>316.9 | -12779.81703<br>-12779.92186<br>-12779.97732 | -12779.79049<br>-12779.89532<br>-12779.95077 |
| <b>INT4</b>                                | -12780.23207 <sup>a</sup>                                                           | -12779.59748                                 | 321.4                   | 300.2                   | -12779.78860                                 | -12779.77599                                 |

|                                  |                           |              |       |       |              |              |
|----------------------------------|---------------------------|--------------|-------|-------|--------------|--------------|
|                                  | -12780.35085 <sup>b</sup> | -12779.71547 | 313.7 | 292.4 | -12779.90200 | -12779.88934 |
|                                  | -12780.43094              | -12779.79495 | 313.8 | 292.4 | -12779.98153 | -12779.96883 |
| <b>TS4</b>                       | -12780.20775 <sup>a</sup> | -12779.57460 | 316.4 | 295.2 | -12779.76272 | -12779.75013 |
|                                  | -12780.32205 <sup>b</sup> | -12779.68849 | 314.5 | 293.3 | -12779.87552 | -12779.86290 |
|                                  | -12780.40098 <sup>c</sup> | -12779.76642 | 309.7 | 288.4 | -12779.95057 | -12779.93790 |
| <b>INT5</b>                      | -12551.05508 <sup>a</sup> | -12550.49154 | 286.0 | 264.6 | -12550.66159 | -12550.64885 |
|                                  | -12551.15274 <sup>b</sup> | -12550.58883 | 282.0 | 260.8 | -12550.75653 | -12550.74389 |
|                                  | -12551.21945 <sup>c</sup> | -12550.65540 | 287.8 | 266.5 | -12550.82656 | -12550.81389 |
| <b>INT5<br/>+HOAc</b>            | -12780.23682 <sup>a</sup> | -12779.60478 | 359.2 | 317.2 | -12779.81833 | -12779.79339 |
|                                  | -12780.34246 <sup>b</sup> | -12779.71007 | 355.1 | 313.4 | -12779.92122 | -12779.89565 |
|                                  | -12780.40820 <sup>c</sup> | -12779.77562 | 360.8 | 319.0 | -12779.99020 | -12779.96533 |
| <b>INT6</b>                      | -12780.24061 <sup>a</sup> | -12779.60591 | 310.8 | 289.4 | -12779.79073 | -12779.77798 |
|                                  | -12780.35092 <sup>b</sup> | -12779.71604 | 314.5 | 293.3 | -12779.90304 | -12779.89044 |
|                                  | -12780.42729 <sup>c</sup> | -12779.79152 | 313.6 | 292.4 | -12779.97801 | -12779.96539 |
| <b>TS5</b>                       | -12780.21296 <sup>a</sup> | -12779.58366 | 322.0 | 300.9 | -12779.77513 | -12779.76258 |
|                                  | -12780.32687 <sup>b</sup> | -12779.69705 | 312.5 | 291.3 | -12779.88286 | -12779.87026 |
|                                  | -12780.40433 <sup>c</sup> | -12779.77374 | 310.9 | 289.7 | -12779.95861 | -12779.94599 |
| <b>INT7</b>                      | -12780.26348 <sup>a</sup> | -12779.62780 | 317.7 | 296.4 | -12779.81674 | -12779.80407 |
|                                  | -12780.37124 <sup>b</sup> | -12779.73559 | 319.2 | 298.1 | -12779.92539 | -12779.91286 |
|                                  | -12780.44341 <sup>c</sup> | -12779.80662 | 315.8 | 294.7 | -12779.99440 | -12779.98183 |
| <b>TS6</b>                       | -12780.24559 <sup>a</sup> | -12779.61173 | 313.0 | 291.6 | -12779.79786 | -12779.78516 |
|                                  | -12780.35935 <sup>b</sup> | -12779.72491 | 312.8 | 291.5 | -12779.91091 | -12779.89827 |
|                                  | -12780.43575 <sup>c</sup> | -12779.80065 | 308.1 | 286.7 | -12779.98385 | -12779.97112 |
| <b>CAT + 3a</b>                  | -12780.25426 <sup>a</sup> | -12779.62215 | 365.1 | 321.0 | -12779.83923 | -12779.81303 |
|                                  | -12780.35940 <sup>b</sup> | -12779.72680 | 358.9 | 132.9 | -12779.94018 | -12779.91394 |
|                                  | -12780.41640 <sup>c</sup> | -12779.78339 | 362.8 | 318.5 | -12779.99909 | -12779.97281 |
| <b>TS1-N</b>                     | -12342.08236 <sup>b</sup> | -12341.58953 | 258.8 | 237.1 | -12341.74342 | -12341.73050 |
| <b>TS1-O</b>                     | -5688.38442 <sup>b</sup>  | -5687.86227  | 234.2 | 212.6 | -5688.00154  | -5687.98868  |
| <b>TS1-O-N</b>                   | -5688.38944 <sup>b</sup>  | -5687.86696  | 236.2 | 214.5 | -5688.00740  | -5687.99451  |
| <b>CH<sub>3</sub>CN</b>          |                           |              |       |       |              |              |
| <b>1a</b>                        | -440.43790 <sup>b</sup>   | -440.26790   | 104.7 | 81.8  | -440.33019   | -440.31655   |
| <b>2a</b>                        | -438.23039 <sup>b</sup>   | -438.09256   | 97.8  | 74.4  | -438.15070   | -438.13682   |
| <b>CAT</b>                       | -11901.63560 <sup>b</sup> | -11901.31507 | 204.6 | 182.7 | -11901.43674 | -11901.42371 |
| <b>CH<sub>3</sub>CN</b>          | -132.81377 <sup>b</sup>   | -132.76256   | 60.9  | 37.0  | -132.79875   | -132.78454   |
| <b>CAT+<br/>CH<sub>3</sub>CN</b> | -12034.44937 <sup>b</sup> | -12034.07763 | 265.5 | 219.7 | -12034.23549 | -12034.20825 |
| <b>COM1-<br/>CCN</b>             | -12034.48526 <sup>b</sup> | -12034.11054 | 233.7 | 212.1 | -12034.24951 | -12034.23664 |
| <b>TS1-CCN</b>                   | -12474.90681 <sup>b</sup> | -12474.36075 | 295.5 | 274.3 | -12474.53648 | -12474.52385 |
| <b>TS1a-CCN</b>                  | -12474.90852 <sup>b</sup> | -12474.36230 | 299.6 | 278.5 | -12474.54044 | -12474.52794 |

|                        |                           |              |       |       |              |              |
|------------------------|---------------------------|--------------|-------|-------|--------------|--------------|
| <b>INT1a-CCN</b>       | -12474.92851 <sup>b</sup> | -12474.38085 | 305.5 | 284.4 | -12474.56249 | -12474.54999 |
| <b>TS1b-CCN</b>        | -12474.90519 <sup>b</sup> | -12474.35912 | 306.5 | 285.4 | -12474.54136 | -12474.52887 |
| <b>INT1</b>            | -12342.11332 <sup>b</sup> | -12341.61962 | 269.2 | 247.8 | -12341.77968 | -12341.76698 |
| <b>TS2</b>             | -12342.08806 <sup>b</sup> | -12341.59571 | 268.1 | 246.8 | -12341.75514 | -12341.74247 |
| <b>INT2</b>            | -12342.08909 <sup>b</sup> | -12341.59532 | 270.0 | 248.7 | -12341.75589 | -12341.74322 |
| <b>TS3</b>             | -12342.07661 <sup>b</sup> | -12341.58895 | 265.8 | 244.5 | -12341.74699 | -12341.73437 |
| <b>INT3</b>            | -12342.10200 <sup>b</sup> | -12341.60817 | 265.0 | 243.7 | -12341.76577 | -12341.75310 |
| <b>INT4</b>            | -12780.35268 <sup>b</sup> | -12779.71753 | 315.6 | 294.3 | -12779.90520 | -12779.89254 |
| <b>TS4</b>             | -12780.32427 <sup>b</sup> | -12779.69084 | 315.5 | 294.3 | -12779.87846 | -12779.86584 |
| <b>INT5</b>            | -12551.15468 <sup>b</sup> | -12550.59095 | 284.0 | 262.8 | -12550.75986 | -12550.74723 |
| <b>HOAc</b>            | -229.18648 <sup>b</sup>   | -229.11809   | 73.1  | 48.7  | -229.16155   | -229.14705   |
| <b>INT5+HOAc</b>       | -12780.34116              | -12779.70904 | 357.1 | 311.5 | -12779.92141 | -12779.89428 |
| <b>INT6</b>            | -12780.35290 <sup>b</sup> | -12779.71813 | 314.5 | 293.3 | -12779.90518 | -12779.89257 |
| <b>TS5</b>             | -12780.32873 <sup>b</sup> | -12779.69904 | 314.1 | 293.0 | -12779.88583 | -12779.87324 |
| <b>INT7</b>            | -12780.37442 <sup>b</sup> | -12779.73879 | 322.7 | 301.7 | -12779.93070 | -12779.91819 |
| <b>3a</b>              | -878.70438 <sup>b</sup>   | -878.39237   | 156.3 | 134.0 | -878.48528   | -878.47206   |
| <b>3a+CAT</b>          | -12780.33998 <sup>b</sup> | -12779.70744 | 360.9 | 316.7 | -12779.92202 | -12779.89577 |
| <b>DMF<sup>a</sup></b> |                           |              |       |       |              |              |
| <b>1a</b>              | -440.44691 <sup>b</sup>   | -440.27698   | 104.7 | 81.7  | -440.33923   | -440.32559   |
| <b>DMF</b>             | -248.62040 <sup>b</sup>   | -248.50841   | 81.3  | 57.7  | -248.55675   | -248.54274   |
| <b>CAT</b>             | -11901.63565 <sup>b</sup> | -11901.31512 | 204.6 | 182.7 | -11901.43679 | -11901.42377 |
| <b>COM1-DMF</b>        | -12150.29145 <sup>b</sup> | -12149.85652 | 242.5 | 221.0 | -12150.00073 | -12149.98796 |
| <b>TS1a-DMF</b>        | -12590.72002 <sup>b</sup> | -12590.11246 | 311.5 | 290.5 | -12590.29768 | -12590.28520 |
| <b>INT1a-DMF</b>       | -12590.74145 <sup>b</sup> | -12590.13250 | 312.8 | 291.8 | -12590.31853 | -12590.30602 |
| <b>INT1</b>            | -12342.11738 <sup>b</sup> | -12341.62370 | 267.8 | 246.4 | -12341.78293 | -12341.77023 |

- a) Without dispersion; b) with half of the sum of solute dispersion and solvent-solute dispersion; c) only with full solute dispersion.

**Table S2** Coordinates of all Stationary points for the reaction of **CAT+1a+2a**, computed at B3LYP-D3a+IDSCRF/ TZP-DKH(-dfg) level in DCE solvent

|           |          |          |          |            |          |          |          |
|-----------|----------|----------|----------|------------|----------|----------|----------|
| <b>1a</b> |          |          |          | <b>2a</b>  |          |          |          |
| C         | 0.24456  | 0.10694  | -0.03917 | C          | 1.94717  | 0.66478  | 0.25002  |
| C         | 0.79385  | -1.16780 | -0.19525 | C          | 1.94721  | -0.66469 | 0.24999  |
| C         | 2.17073  | -1.35000 | -0.14747 | H          | 2.76151  | 1.34974  | 0.43726  |
| C         | 3.01171  | -0.26229 | 0.06059  | H          | 2.76160  | -1.34960 | 0.43720  |
| C         | 2.47146  | 1.01148  | 0.21048  | C          | 0.56199  | 1.14075  | -0.06825 |
| C         | 1.09717  | 1.19544  | 0.15318  | O          | 0.16855  | 2.28218  | -0.16047 |
| H         | 0.15581  | -2.02358 | -0.38267 | C          | 0.56204  | -1.14073 | -0.06817 |
| H         | 2.58671  | -2.34190 | -0.27956 | O          | 0.16867  | -2.28218 | -0.16048 |
| H         | 4.08524  | -0.40588 | 0.09975  | N          | -0.21341 | -0.00001 | -0.24996 |
| H         | 3.12346  | 1.86259  | 0.36890  | C          | -1.63713 | -0.00005 | -0.56626 |
| H         | 0.66595  | 2.18272  | 0.25647  | H          | -1.82696 | -0.88291 | -1.17684 |
| C         | -1.23051 | 0.37412  | -0.09781 | H          | -1.82700 | 0.88275  | -1.17690 |
| O         | -1.67142 | 1.48427  | -0.39799 | C          | -2.51957 | -0.00002 | 0.67648  |
| N         | -2.05104 | -0.66174 | 0.18892  | H          | -2.33614 | 0.88639  | 1.28549  |
| H         | -1.66232 | -1.51087 | 0.57132  | H          | -3.57102 | -0.00006 | 0.38268  |
| C         | -3.49526 | -0.50650 | 0.17557  | H          | -2.33610 | -0.88639 | 1.28556  |
| H         | -3.83339 | 0.17378  | 0.96130  |            |          |          |          |
| H         | -3.82281 | -0.10489 | -0.78343 |            |          |          |          |
| H         | -3.95232 | -1.48245 | 0.32867  |            |          |          |          |
| <b>3a</b> |          |          |          | <b>CAT</b> |          |          |          |
| C         | 1.92677  | 0.17309  | 0.11498  | Ru         | 1.23699  | 0.55452  | 0.20568  |
| C         | 3.31709  | 0.30918  | 0.10125  | C          | 1.54831  | 0.09594  | 2.36162  |
| C         | 4.14391  | -0.77037 | -0.17643 | C          | 0.96292  | -1.01623 | 1.73017  |
| C         | 3.57839  | -2.00466 | -0.46222 | C          | 1.52849  | -1.60382 | 0.56412  |
| C         | 2.19652  | -2.14482 | -0.46232 | C          | 2.70379  | -1.08544 | -0.01242 |
| C         | 1.34812  | -1.07834 | -0.16413 | C          | 3.29823  | 0.05683  | 0.61178  |
| H         | 3.75734  | 1.27062  | 0.33699  | C          | 2.73147  | 0.63323  | 1.76789  |
| H         | 5.22006  | -0.64551 | -0.16778 | H          | 0.00427  | -1.37705 | 2.07625  |
| H         | 4.20722  | -2.85756 | -0.68886 | H          | 0.97364  | -2.38925 | 0.07402  |
| H         | 1.76049  | -3.10851 | -0.70190 | H          | 4.15208  | 0.53371  | 0.14871  |
| C         | 1.08589  | 1.35931  | 0.48085  | H          | 3.15354  | 1.55072  | 2.15762  |
| O         | 0.12475  | 1.26158  | 1.24650  | C          | 0.90459  | 0.74689  | 3.54601  |
| N         | 1.45965  | 2.54063  | -0.05142 | H          | 1.30705  | 0.31731  | 4.46774  |
| H         | 2.14999  | 2.54430  | -0.78930 | H          | 1.10284  | 1.81861  | 3.56121  |
| C         | 0.71299  | 3.75914  | 0.21025  | H          | -0.17308 | 0.58760  | 3.53475  |
| H         | 0.58315  | 3.89512  | 1.28341  | C          | 3.30840  | -1.63608 | -1.28174 |
| H         | 1.27014  | 4.60305  | -0.19237 | H          | 3.78202  | -0.79190 | -1.79228 |
| H         | -0.27626 | 3.72906  | -0.25304 | C          | 4.41062  | -2.64197 | -0.90800 |
| C         | -0.80698 | -1.61419 | 1.19537  | H          | 3.98821  | -3.50723 | -0.39186 |
| C         | -0.13803 | -1.35797 | -0.16712 | H          | 4.91139  | -2.99619 | -1.81062 |

|            |          |          |          |             |          |          |          |
|------------|----------|----------|----------|-------------|----------|----------|----------|
| H          | -0.90724 | -2.67087 | 1.44190  | H           | 5.16402  | -2.19267 | -0.25815 |
| H          | -0.28699 | -2.24778 | -0.78924 | C           | 2.28816  | -2.25418 | -2.23759 |
| C          | -2.17094 | -0.97055 | 1.08197  | H           | 2.78335  | -2.52900 | -3.17000 |
| O          | -3.08563 | -1.03773 | 1.87523  | H           | 1.84405  | -3.16319 | -1.82626 |
| C          | -1.03384 | -0.31053 | -0.81937 | H           | 1.48503  | -1.55479 | -2.47518 |
| O          | -0.80844 | 0.32242  | -1.82772 | O           | 1.42947  | 1.53931  | -1.68268 |
| N          | -2.21458 | -0.24654 | -0.09917 | C           | 0.99547  | 2.62776  | -1.18461 |
| C          | -3.34355 | 0.59335  | -0.48662 | O           | 0.82824  | 2.65054  | 0.07656  |
| H          | -2.93068 | 1.45188  | -1.01524 | C           | 0.66952  | 3.80349  | -2.03841 |
| H          | -3.81010 | 0.94180  | 0.43421  | H           | -0.37670 | 3.73094  | -2.34595 |
| C          | -4.35005 | -0.14814 | -1.35765 | H           | 1.29072  | 3.80635  | -2.93223 |
| H          | -4.76328 | -1.00874 | -0.82958 | H           | 0.79801  | 4.72668  | -1.47617 |
| H          | -5.17391 | 0.51798  | -1.62075 | Sb          | -2.51550 | -0.40093 | -0.10404 |
| H          | -3.88577 | -0.49590 | -2.28193 | F           | -0.81820 | 0.51783  | -0.50669 |
| H          | -0.27280 | -1.11485 | 2.00278  | F           | -2.72458 | -0.68398 | -1.96010 |
|            |          |          |          | F           | -4.13841 | -1.28523 | 0.29917  |
|            |          |          |          | F           | -2.15521 | -0.07921 | 1.73381  |
|            |          |          |          | F           | -1.51935 | -2.01648 | 0.02210  |
|            |          |          |          | F           | -3.36527 | 1.28047  | -0.24931 |
| <b>TS1</b> |          |          |          | <b>INT1</b> |          |          |          |
| Ru         | 0.57872  | 0.96691  | -0.06623 | Ru          | -3.12885 | -0.03733 | 0.11454  |
| C          | 0.70306  | 0.33264  | -2.20658 | C           | -3.66570 | 0.99396  | -1.78330 |
| C          | -0.17959 | 1.43926  | -2.06607 | C           | -2.45715 | 0.29534  | -1.96761 |
| C          | 0.23544  | 2.61920  | -1.40939 | C           | -2.35586 | -1.09093 | -1.65695 |
| C          | 1.54394  | 2.74046  | -0.85686 | C           | -3.45734 | -1.81503 | -1.16318 |
| C          | 2.40542  | 1.61528  | -0.98546 | C           | -4.68492 | -1.10112 | -0.98525 |
| C          | 2.00462  | 0.44177  | -1.67319 | C           | -4.78907 | 0.26720  | -1.28014 |
| H          | -1.21039 | 1.33396  | -2.37182 | H           | -1.57054 | 0.83567  | -2.26922 |
| H          | -0.49505 | 3.39671  | -1.23962 | H           | -1.38503 | -1.56211 | -1.72138 |
| H          | 3.36519  | 1.62902  | -0.48599 | H           | -5.52417 | -1.60508 | -0.52340 |
| H          | 2.65836  | -0.41775 | -1.67486 | H           | -5.70872 | 0.79091  | -1.05631 |
| C          | 0.21808  | -0.94257 | -2.81866 | C           | -3.77391 | 2.46176  | -2.04967 |
| H          | 0.76290  | -1.79961 | -2.42818 | H           | -4.23083 | 2.61722  | -3.03150 |
| H          | -0.84660 | -1.07789 | -2.63800 | H           | -4.40651 | 2.94913  | -1.30732 |
| H          | 0.37595  | -0.89999 | -3.90080 | H           | -2.79586 | 2.93827  | -2.04728 |
| C          | 2.03058  | 3.97325  | -0.13198 | C           | -3.37947 | -3.27674 | -0.78520 |
| H          | 2.68414  | 3.61939  | 0.67170  | H           | -4.19451 | -3.45607 | -0.07767 |
| C          | 2.88041  | 4.81153  | -1.10226 | C           | -3.63502 | -4.13795 | -2.03196 |
| H          | 2.27352  | 5.17310  | -1.93598 | H           | -2.83865 | -4.00282 | -2.76791 |
| H          | 3.29096  | 5.67897  | -0.58261 | H           | -3.66663 | -5.19378 | -1.75728 |
| H          | 3.71263  | 4.23619  | -1.51192 | H           | -4.58387 | -3.88374 | -2.50848 |

|            |          |          |          |             |          |          |          |
|------------|----------|----------|----------|-------------|----------|----------|----------|
| C          | 0.91891  | 4.81620  | 0.49228  | C           | -2.07095 | -3.66152 | -0.09339 |
| H          | 1.36160  | 5.61489  | 1.08952  | H           | -2.11926 | -4.70249 | 0.22988  |
| H          | 0.29869  | 5.29139  | -0.27171 | H           | -1.21201 | -3.56935 | -0.76158 |
| H          | 0.27473  | 4.21990  | 1.13798  | H           | -1.89527 | -3.03902 | 0.78490  |
| O          | -0.43107 | 1.85698  | 1.62723  | O           | -3.75772 | -0.67081 | 2.07321  |
| C          | 0.38033  | 1.33189  | 2.45041  | C           | -3.83811 | 0.53321  | 2.46860  |
| O          | 1.38294  | 0.72859  | 1.96253  | O           | -3.66372 | 1.44123  | 1.59442  |
| C          | 0.14340  | 1.40613  | 3.92227  | C           | -4.08789 | 0.86821  | 3.90089  |
| H          | -0.51817 | 0.58565  | 4.21065  | H           | -3.12469 | 0.96605  | 4.40790  |
| H          | -0.34908 | 2.34296  | 4.17831  | H           | -4.65107 | 0.07235  | 4.38482  |
| H          | 1.08077  | 1.30342  | 4.46559  | H           | -4.61503 | 1.81718  | 3.98342  |
| Sb         | -3.25589 | -0.53694 | -0.02663 | Sb          | 4.74061  | -0.37808 | -0.02812 |
| F          | -1.38372 | -0.26468 | 0.33321  | F           | 5.49144  | 1.18201  | -0.81019 |
| F          | -3.55393 | 1.32427  | 0.21754  | F           | 3.62150  | 0.73630  | 1.07962  |
| F          | -5.10217 | -0.80332 | -0.38906 | F           | 3.92696  | -1.90313 | 0.77859  |
| F          | -2.91357 | -2.38344 | -0.30802 | F           | 5.80951  | -1.49602 | -1.13004 |
| F          | -2.90084 | -0.21895 | -1.87769 | F           | 3.35619  | -0.36945 | -1.34422 |
| F          | -3.51892 | -0.85187 | 1.82536  | F           | 6.07332  | -0.36371 | 1.32308  |
| C          | 3.10536  | -2.52494 | 0.26981  | C           | 0.01302  | 1.72992  | 0.11057  |
| C          | 3.92210  | -3.40774 | -0.44082 | C           | 1.05247  | 1.87636  | -0.81077 |
| C          | 5.29987  | -3.22714 | -0.45869 | C           | 1.18763  | 3.06823  | -1.51163 |
| C          | 5.87332  | -2.16914 | 0.23800  | C           | 0.30481  | 4.11833  | -1.28385 |
| C          | 5.06338  | -1.28510 | 0.94490  | C           | -0.72535 | 3.97443  | -0.35869 |
| C          | 3.68562  | -1.45512 | 0.95484  | C           | -0.88124 | 2.78011  | 0.33019  |
| H          | 3.48760  | -4.22418 | -1.00585 | H           | 1.74376  | 1.06441  | -0.99447 |
| H          | 5.92457  | -3.91081 | -1.02134 | H           | 1.98739  | 3.17580  | -2.23437 |
| H          | 6.94838  | -2.03222 | 0.22738  | H           | 0.42025  | 5.05008  | -1.82512 |
| H          | 5.50827  | -0.46163 | 1.49145  | H           | -1.40715 | 4.79581  | -0.17278 |
| H          | 3.04428  | -0.77311 | 1.49545  | H           | -1.68112 | 2.66198  | 1.04894  |
| C          | 1.61319  | -2.65418 | 0.30757  | C           | -0.15046 | 0.47376  | 0.88412  |
| O          | 0.88211  | -1.66929 | 0.44685  | O           | -1.28096 | -0.02199 | 1.15216  |
| N          | 1.11014  | -3.89818 | 0.16970  | N           | 0.94391  | -0.12308 | 1.32641  |
| H          | 1.74581  | -4.68225 | 0.21492  | H           | 1.84104  | 0.33605  | 1.20266  |
| C          | -0.31771 | -4.16969 | 0.20670  | C           | 0.93175  | -1.39092 | 2.04119  |
| H          | -0.86451 | -3.27904 | -0.08523 | H           | 0.19166  | -2.05421 | 1.59925  |
| H          | -0.54905 | -4.98313 | -0.48115 | H           | 1.92166  | -1.83202 | 1.95605  |
| H          | -0.64119 | -4.45719 | 1.21094  | H           | 0.68168  | -1.24534 | 3.09417  |
| <b>TS2</b> |          |          |          | <b>INT2</b> |          |          |          |
| Ru         | 3.13682  | -0.09655 | 0.06290  | Ru          | 3.00886  | -0.06632 | 0.05421  |
| C          | 4.19189  | -1.06184 | -1.62430 | C           | 4.20468  | -0.92963 | -1.61818 |
| C          | 3.21428  | -0.16481 | -2.15951 | C           | 3.19907  | -0.05929 | -2.14961 |



|   |          |          |          |   |          |          |          |
|---|----------|----------|----------|---|----------|----------|----------|
| C | 3.16512  | 1.17301  | -1.75251 | C | 3.07724  | 1.27036  | -1.72610 |
| C | 4.08398  | 1.67974  | -0.78139 | C | 3.93014  | 1.78313  | -0.70355 |
| C | 5.07508  | 0.78779  | -0.28615 | C | 4.91823  | 0.91567  | -0.16666 |
| C | 5.14351  | -0.55966 | -0.71084 | C | 5.07002  | -0.41557 | -0.63641 |
| H | 2.44466  | -0.55012 | -2.81518 | H | 2.47459  | -0.45862 | -2.84808 |
| H | 2.35209  | 1.79362  | -2.10196 | H | 2.26335  | 1.86853  | -2.10936 |
| H | 5.72920  | 1.12388  | 0.50809  | H | 5.52163  | 1.25773  | 0.66405  |
| H | 5.84816  | -1.23418 | -0.24508 | H | 5.77746  | -1.07487 | -0.15335 |
| C | 4.18698  | -2.50953 | -1.99802 | C | 4.31271  | -2.35175 | -2.06850 |
| H | 3.20185  | -2.82808 | -2.33287 | H | 3.37803  | -2.70163 | -2.50282 |
| H | 4.89258  | -2.66716 | -2.81946 | H | 5.08866  | -2.42614 | -2.83620 |
| H | 4.49542  | -3.12825 | -1.15667 | H | 4.58464  | -2.99832 | -1.23599 |
| C | 4.06757  | 3.10868  | -0.29348 | C | 3.83155  | 3.19414  | -0.17346 |
| H | 4.43272  | 3.08704  | 0.73783  | H | 4.08338  | 3.14299  | 0.89031  |
| C | 5.06585  | 3.92350  | -1.13461 | C | 4.90031  | 4.05273  | -0.87364 |
| H | 4.75454  | 3.95894  | -2.18144 | H | 4.70279  | 4.12045  | -1.94616 |
| H | 5.11264  | 4.94778  | -0.76115 | H | 4.88721  | 5.06370  | -0.46307 |
| H | 6.07111  | 3.50042  | -1.09255 | H | 5.90276  | 3.64364  | -0.73702 |
| C | 2.68512  | 3.75846  | -0.29499 | C | 2.44857  | 3.82766  | -0.30849 |
| H | 2.74867  | 4.74783  | 0.16030  | H | 2.44631  | 4.80048  | 0.18530  |
| H | 2.30074  | 3.89424  | -1.30866 | H | 2.18012  | 3.99667  | -1.35400 |
| H | 1.97170  | 3.16394  | 0.27306  | H | 1.68291  | 3.20856  | 0.15522  |
| O | 3.63114  | -2.52745 | 1.58658  | O | 3.99085  | -2.76546 | 1.35168  |
| C | 3.74333  | -1.60353 | 2.40220  | C | 3.83892  | -1.90268 | 2.21510  |
| O | 3.53675  | -0.36350 | 2.09472  | O | 3.34980  | -0.71501 | 1.99616  |
| C | 4.14357  | -1.84921 | 3.83793  | C | 4.21789  | -2.14667 | 3.66107  |
| H | 3.53474  | -1.25061 | 4.51512  | H | 3.46503  | -1.73772 | 4.33437  |
| H | 5.18374  | -1.54433 | 3.97547  | H | 5.15969  | -1.63397 | 3.87183  |
| H | 4.05038  | -2.90556 | 4.07935  | H | 4.34904  | -3.21144 | 3.84080  |
| C | 0.00326  | -0.79882 | -0.19741 | C | 0.08343  | -0.66504 | -0.17046 |
| C | -1.05111 | -0.98344 | -1.08921 | C | -0.84656 | -0.76852 | -1.19995 |
| C | -1.16139 | -2.18174 | -1.78397 | C | -0.84900 | -1.90133 | -2.00593 |
| C | -0.23363 | -3.19998 | -1.58518 | C | 0.06148  | -2.93293 | -1.78670 |
| C | 0.81563  | -3.02167 | -0.68995 | C | 0.97938  | -2.84130 | -0.74855 |
| C | 0.93180  | -1.82443 | 0.00259  | C | 0.99376  | -1.70864 | 0.06041  |
| H | -1.77445 | -0.19794 | -1.25869 | H | -1.54999 | 0.03170  | -1.38861 |
| H | -1.98023 | -2.31959 | -2.47922 | H | -1.56925 | -1.97898 | -2.81139 |
| H | -0.33311 | -4.13528 | -2.12313 | H | 0.04278  | -3.81257 | -2.41882 |
| H | 1.52686  | -3.81732 | -0.50701 | H | 1.67359  | -3.64657 | -0.54571 |
| H | 1.69213  | -1.75037 | 0.78188  | H | 1.61339  | -1.69899 | 0.95482  |
| C | 0.21075  | 0.45353  | 0.56592  | C | 0.20940  | 0.53221  | 0.69747  |

|            |          |          |          |             |          |          |          |
|------------|----------|----------|----------|-------------|----------|----------|----------|
| O          | 1.37954  | 0.81375  | 0.88417  | O           | 1.36239  | 0.90633  | 1.05409  |
| N          | -0.83319 | 1.17267  | 0.93515  | N           | -0.87345 | 1.17011  | 1.09245  |
| H          | -1.77144 | 0.84127  | 0.72260  | H           | -1.78768 | 0.81523  | 0.81657  |
| C          | -0.71132 | 2.41194  | 1.68906  | C           | -0.82907 | 2.34715  | 1.94875  |
| H          | -0.29967 | 3.20894  | 1.06821  | H           | -0.42758 | 3.20728  | 1.41116  |
| H          | -1.70414 | 2.70158  | 2.02454  | H           | -1.84396 | 2.57017  | 2.26835  |
| H          | -0.06229 | 2.27145  | 2.55283  | H           | -0.20530 | 2.15957  | 2.82219  |
| Sb         | -5.25546 | 0.15451  | 0.02953  | Sb          | -5.21640 | 0.06340  | 0.02072  |
| F          | -3.40904 | 0.51225  | 0.41265  | F           | -3.37443 | 0.42607  | 0.42124  |
| F          | -5.20651 | 1.50867  | -1.30608 | F           | -5.15574 | 1.41834  | -1.31364 |
| F          | -4.69490 | -1.12533 | -1.26411 | F           | -4.64743 | -1.21563 | -1.26835 |
| F          | -5.23844 | -1.19068 | 1.37183  | F           | -5.20614 | -1.28140 | 1.36337  |
| F          | -7.08504 | -0.19979 | -0.35020 | F           | -7.04378 | -0.28977 | -0.37049 |
| F          | -5.74146 | 1.45455  | 1.32961  | F           | -5.71357 | 1.36261  | 1.31801  |
| <b>TS3</b> |          |          |          | <b>INT3</b> |          |          |          |
| Ru         | -2.97886 | 0.16974  | -0.06253 | Ru          | -2.92410 | 0.36841  | -0.09156 |
| C          | -3.33545 | 2.09710  | -1.17273 | C           | -3.65911 | 1.98589  | -1.41013 |
| C          | -3.41800 | 1.00270  | -2.05367 | C           | -3.57338 | 0.77288  | -2.13106 |
| C          | -4.31515 | -0.08296 | -1.82858 | C           | -4.33026 | -0.38749 | -1.77300 |
| C          | -5.14485 | -0.10433 | -0.69289 | C           | -5.07625 | -0.40262 | -0.59730 |
| C          | -5.02506 | 0.96907  | 0.24185  | C           | -5.07101 | 0.78870  | 0.20935  |
| C          | -4.14405 | 2.03864  | 0.00243  | C           | -4.43499 | 1.96669  | -0.21236 |
| H          | -2.74404 | 0.95341  | -2.89985 | H           | -2.92256 | 0.72153  | -2.99430 |
| H          | -4.30190 | -0.91605 | -2.51505 | H           | -4.23543 | -1.27511 | -2.38156 |
| H          | -5.58810 | 0.94113  | 1.16486  | H           | -5.57509 | 0.77756  | 1.16679  |
| H          | -4.04212 | 2.81023  | 0.75431  | H           | -4.47320 | 2.84480  | 0.41829  |
| C          | -2.41227 | 3.24747  | -1.42819 | C           | -2.94886 | 3.22349  | -1.86432 |
| H          | -1.58446 | 2.95141  | -2.07190 | H           | -2.08305 | 2.97498  | -2.47792 |
| H          | -2.95580 | 4.05482  | -1.92675 | H           | -3.62290 | 3.84075  | -2.46498 |
| H          | -2.00735 | 3.64055  | -0.49701 | H           | -2.61247 | 3.81785  | -1.01538 |
| C          | -6.08879 | -1.24152 | -0.38276 | C           | -5.84425 | -1.60658 | -0.10241 |
| H          | -6.05719 | -1.37670 | 0.70224  | H           | -5.75007 | -1.60314 | 0.98859  |
| C          | -7.51702 | -0.81824 | -0.76917 | C           | -7.33402 | -1.43070 | -0.44282 |
| H          | -7.59733 | -0.66294 | -1.84767 | H           | -7.48363 | -1.42844 | -1.52509 |
| H          | -8.22413 | -1.59971 | -0.48574 | H           | -7.91596 | -2.25182 | -0.02023 |
| H          | -7.81524 | 0.10530  | -0.26961 | H           | -7.73063 | -0.49518 | -0.04421 |
| C          | -5.70905 | -2.56972 | -1.03429 | C           | -5.31899 | -2.94461 | -0.61974 |
| H          | -6.38269 | -3.35238 | -0.68164 | H           | -5.85572 | -3.76274 | -0.13690 |
| H          | -5.80372 | -2.52944 | -2.12207 | H           | -5.47101 | -3.04924 | -1.69649 |
| H          | -4.68981 | -2.85830 | -0.77865 | H           | -4.25467 | -3.07089 | -0.41447 |
| O          | -1.78282 | -0.98506 | 2.60017  | O           | -1.62111 | -2.64676 | 0.82017  |

|             |          |          |          |            |          |          |          |
|-------------|----------|----------|----------|------------|----------|----------|----------|
| C           | -2.59160 | -1.82366 | 2.11363  | C          | -2.31954 | -2.06501 | 1.77207  |
| O           | -3.22464 | -1.62418 | 1.03629  | O          | -2.79869 | -0.93362 | 1.67216  |
| C           | -2.80903 | -3.12189 | 2.83894  | C          | -2.49313 | -2.89435 | 3.00051  |
| H           | -1.87301 | -3.68394 | 2.84171  | H          | -2.90300 | -3.86900 | 2.73077  |
| H           | -3.58851 | -3.70975 | 2.36182  | H          | -3.14592 | -2.39076 | 3.70741  |
| H           | -3.07060 | -2.91844 | 3.87811  | H          | -1.51535 | -3.06698 | 3.45539  |
| C           | -0.12005 | 0.89890  | 0.37474  | Sb         | 5.34285  | -0.26183 | -0.15810 |
| C           | 0.95128  | 1.78007  | 0.47755  | F          | 4.84803  | -1.55468 | 1.14567  |
| C           | 0.84233  | 2.89245  | 1.30421  | F          | 3.64407  | 0.60521  | 0.12466  |
| C           | -0.32194 | 3.10940  | 2.03542  | F          | 5.77252  | 1.04193  | -1.47105 |
| C           | -1.38663 | 2.22106  | 1.93682  | F          | 7.00524  | -1.13654 | -0.44103 |
| C           | -1.31945 | 1.10843  | 1.09245  | F          | 6.08959  | 0.84399  | 1.19538  |
| H           | 1.86464  | 1.61503  | -0.07942 | F          | 4.50447  | -1.32717 | -1.50314 |
| H           | 1.67116  | 3.58526  | 1.38422  | C          | -0.16411 | 1.20492  | 0.50702  |
| H           | -0.39424 | 3.96840  | 2.69261  | C          | 0.91724  | 1.93164  | 1.01909  |
| H           | -2.26893 | 2.37604  | 2.54716  | C          | 0.67841  | 3.00365  | 1.86002  |
| H           | -1.75135 | 0.03117  | 1.73520  | C          | -0.63402 | 3.33413  | 2.19335  |
| C           | -0.13061 | -0.29294 | -0.49296 | C          | -1.70596 | 2.61120  | 1.68067  |
| O           | -1.24697 | -0.83570 | -0.75787 | C          | -1.50166 | 1.53660  | 0.81268  |
| N           | 0.98604  | -0.80533 | -0.97621 | H          | 1.93593  | 1.66030  | 0.77083  |
| H           | 1.88085  | -0.40499 | -0.71043 | H          | 1.50613  | 3.57511  | 2.26111  |
| C           | 1.00239  | -1.98624 | -1.82551 | H          | -0.82303 | 4.16715  | 2.86219  |
| H           | 0.36083  | -1.84081 | -2.69489 | H          | -2.70862 | 2.89715  | 1.97466  |
| H           | 2.02568  | -2.15255 | -2.15295 | H          | -1.45241 | -1.99633 | 0.08516  |
| H           | 0.65135  | -2.86379 | -1.28009 | C          | -0.02236 | 0.03005  | -0.34645 |
| Sb          | 5.40876  | -0.25252 | -0.13963 | O          | -1.09944 | -0.55889 | -0.73206 |
| F           | 3.53809  | 0.06921  | -0.44831 | N          | 1.14374  | -0.46216 | -0.71630 |
| F           | 5.82873  | 1.05964  | -1.44964 | H          | 1.99619  | -0.01815 | -0.39068 |
| F           | 5.38393  | 1.09795  | 1.19792  | C          | 1.28179  | -1.64649 | -1.55440 |
| F           | 4.92299  | -1.55597 | 1.15819  | H          | 0.67486  | -1.54632 | -2.45392 |
| F           | 7.25465  | -0.58257 | 0.17054  | H          | 2.33030  | -1.74324 | -1.82121 |
| F           | 5.36054  | -1.58818 | -1.49485 | H          | 0.96540  | -2.54389 | -1.01907 |
| <b>INT4</b> |          |          |          | <b>TS4</b> |          |          |          |
| Ru          | 1.27241  | -0.44111 | -0.24864 | Ru         | -1.94747 | -0.23170 | 0.68149  |
| C           | 0.26722  | -1.02346 | -2.31038 | C          | -2.95374 | -0.77679 | 2.73086  |
| C           | -0.23944 | 0.19550  | -1.84064 | C          | -3.17362 | 0.56618  | 2.42371  |
| C           | 0.60635  | 1.32023  | -1.62477 | C          | -3.76734 | 0.96359  | 1.18437  |
| C           | 1.98239  | 1.25094  | -1.86581 | C          | -4.20074 | 0.02035  | 0.23813  |
| C           | 2.51517  | -0.04980 | -2.10583 | C          | -3.85744 | -1.33999 | 0.49330  |
| C           | 1.68296  | -1.16349 | -2.33927 | C          | -3.22607 | -1.72325 | 1.69522  |
| H           | -1.29538 | 0.30735  | -1.65474 | H          | -2.86038 | 1.33423  | 3.11957  |

|    |          |          |          |    |          |          |          |
|----|----------|----------|----------|----|----------|----------|----------|
| H  | 0.15008  | 2.24418  | -1.30064 | H  | -3.87921 | 2.01934  | 0.98692  |
| H  | 3.58633  | -0.17778 | -2.18495 | H  | -4.08653 | -2.09420 | -0.24833 |
| H  | 2.13507  | -2.11460 | -2.58743 | H  | -2.97388 | -2.76536 | 1.84592  |
| C  | -0.65615 | -2.13493 | -2.68844 | C  | -2.37702 | -1.20696 | 4.04084  |
| H  | -1.53898 | -2.13415 | -2.05122 | H  | -1.89872 | -0.37353 | 4.55399  |
| H  | -0.98140 | -1.97512 | -3.72104 | H  | -3.17384 | -1.59114 | 4.68401  |
| H  | -0.16724 | -3.10473 | -2.63517 | H  | -1.64599 | -2.00352 | 3.90809  |
| C  | 2.87527  | 2.46433  | -1.90783 | C  | -4.98628 | 0.38531  | -0.99688 |
| H  | 3.87169  | 2.15518  | -1.58862 | H  | -4.74803 | -0.36001 | -1.75752 |
| C  | 2.97572  | 2.92089  | -3.37726 | C  | -6.48563 | 0.27171  | -0.66671 |
| H  | 2.00333  | 3.24977  | -3.75097 | H  | -6.77608 | 1.00663  | 0.08807  |
| H  | 3.67127  | 3.75838  | -3.45286 | H  | -7.07790 | 0.45491  | -1.56499 |
| H  | 3.33672  | 2.12069  | -4.02601 | H  | -6.74163 | -0.72037 | -0.28967 |
| C  | 2.42454  | 3.60951  | -1.00385 | C  | -4.64778 | 1.75880  | -1.57174 |
| H  | 3.15844  | 4.41511  | -1.04700 | H  | -5.20042 | 1.91051  | -2.50002 |
| H  | 1.46519  | 4.02336  | -1.32155 | H  | -4.92809 | 2.56555  | -0.89087 |
| H  | 2.34829  | 3.28546  | 0.03302  | H  | -3.58471 | 1.84119  | -1.79784 |
| Sb | -4.18535 | 0.22224  | -0.42730 | Sb | 4.50746  | 0.20289  | -0.49274 |
| F  | -2.77222 | -1.06577 | -0.37692 | F  | 2.66056  | -0.24058 | -0.67494 |
| F  | -3.09065 | 1.33631  | -1.53614 | F  | 4.11591  | 1.06690  | 1.19120  |
| F  | -5.56200 | 1.53297  | -0.47624 | F  | 6.34050  | 0.64952  | -0.26560 |
| F  | -5.24526 | -0.89963 | 0.68783  | F  | 4.86589  | -0.61798 | -2.16609 |
| F  | -4.89187 | -0.62039 | -1.98170 | F  | 4.78029  | -1.43819 | 0.42259  |
| F  | -3.43873 | 1.05388  | 1.11419  | F  | 4.16868  | 1.86953  | -1.34565 |
| C  | -0.49888 | -2.20720 | 1.31798  | C  | 0.81597  | -0.06753 | 1.73217  |
| C  | -1.18010 | -3.35321 | 1.73841  | C  | 1.74285  | -0.26740 | 2.74680  |
| C  | -0.84148 | -4.58628 | 1.21352  | C  | 1.86196  | -1.51822 | 3.33880  |
| C  | 0.19505  | -4.67323 | 0.28600  | C  | 1.04581  | -2.55910 | 2.91212  |
| C  | 0.86888  | -3.53418 | -0.13924 | C  | 0.11745  | -2.36602 | 1.89570  |
| C  | 0.50899  | -2.28046 | 0.34482  | C  | -0.02935 | -1.11453 | 1.29849  |
| H  | -1.97617 | -3.29010 | 2.47284  | H  | 2.35600  | 0.55427  | 3.09444  |
| H  | -1.36833 | -5.47719 | 1.53137  | H  | 2.58538  | -1.67717 | 4.12851  |
| H  | 0.48396  | -5.64070 | -0.10932 | H  | 1.13349  | -3.53789 | 3.36925  |
| H  | 1.68369  | -3.64136 | -0.84295 | H  | -0.47493 | -3.20421 | 1.56005  |
| C  | -0.69679 | -0.87396 | 1.87203  | C  | 0.57193  | 1.23611  | 1.11029  |
| O  | -0.00082 | 0.07535  | 1.36582  | O  | -0.58995 | 1.44873  | 0.62484  |
| N  | -1.49077 | -0.63460 | 2.89731  | N  | 1.52493  | 2.14219  | 1.03829  |
| H  | -2.05769 | -1.39658 | 3.24616  | H  | 2.46343  | 1.84223  | 1.28501  |
| C  | -1.64358 | 0.67501  | 3.52171  | C  | 1.37306  | 3.42791  | 0.37062  |
| H  | -2.14730 | 0.53668  | 4.47543  | H  | 2.36279  | 3.85790  | 0.24314  |
| H  | -0.66440 | 1.11869  | 3.69613  | H  | 0.90820  | 3.30037  | -0.60677 |

|             |          |          |          |             |          |          |          |
|-------------|----------|----------|----------|-------------|----------|----------|----------|
| H           | -2.24152 | 1.32732  | 2.88770  | H           | 0.76280  | 4.10582  | 0.96932  |
| C           | 2.73261  | -1.17269 | 1.23119  | C           | -0.21369 | -1.20290 | -0.61302 |
| C           | 2.76179  | 0.23343  | 1.24541  | C           | -1.20397 | -0.39498 | -1.30324 |
| H           | 2.26629  | -1.79735 | 1.97524  | H           | 0.82619  | -0.90652 | -0.69589 |
| H           | 2.25530  | 0.87174  | 1.95464  | H           | -0.94082 | 0.57558  | -1.70197 |
| C           | 4.00260  | -1.64673 | 0.60293  | C           | -0.47718 | -2.63903 | -1.05461 |
| O           | 4.36238  | -2.78367 | 0.38370  | O           | 0.13022  | -3.63881 | -0.74476 |
| C           | 4.09787  | 0.65093  | 0.71968  | C           | -1.97556 | -1.29712 | -2.18758 |
| O           | 4.57524  | 1.76516  | 0.67502  | O           | -2.82515 | -1.01898 | -3.00866 |
| N           | 4.75442  | -0.50711 | 0.31332  | N           | -1.53132 | -2.60316 | -1.94485 |
| C           | 6.07729  | -0.52841 | -0.30066 | C           | -2.07312 | -3.78630 | -2.60627 |
| H           | 6.17471  | 0.38504  | -0.88783 | H           | -3.12441 | -3.58175 | -2.80736 |
| H           | 6.09945  | -1.38058 | -0.98039 | H           | -2.00932 | -4.60933 | -1.89449 |
| C           | 7.19841  | -0.62820 | 0.72639  | C           | -1.33334 | -4.12580 | -3.89440 |
| H           | 7.11009  | -1.54555 | 1.31007  | H           | -0.28067 | -4.33108 | -3.69619 |
| H           | 8.16529  | -0.63742 | 0.21977  | H           | -1.77482 | -5.01397 | -4.35022 |
| H           | 7.17766  | 0.22339  | 1.40770  | H           | -1.40158 | -3.30482 | -4.60932 |
| H           | -0.32031 | 1.84559  | 1.34538  | H           | -1.46374 | 2.94604  | 0.20062  |
| O           | -0.46208 | 2.81083  | 1.20301  | O           | -2.06781 | 3.72419  | 0.14201  |
| O           | 1.07828  | 2.97119  | 2.82551  | O           | -1.29306 | 3.80013  | -1.96195 |
| C           | 0.31432  | 3.50343  | 2.04780  | C           | -2.00804 | 4.24828  | -1.09311 |
| C           | 0.11414  | 4.98522  | 1.91846  | C           | -2.91887 | 5.43135  | -1.25186 |
| H           | -0.90163 | 5.24027  | 2.22879  | H           | -2.64495 | 6.20717  | -0.53421 |
| H           | 0.83056  | 5.51355  | 2.54147  | H           | -2.84892 | 5.82128  | -2.26352 |
| H           | 0.22002  | 5.29153  | 0.87707  | H           | -3.94796 | 5.13928  | -1.03552 |
| <b>INT5</b> |          |          |          | <b>INT6</b> |          |          |          |
| Ru          | 2.33107  | -0.72394 | 0.26844  | Ru          | 2.51139  | -1.01056 | 0.44115  |
| C           | 2.71616  | -1.52383 | 2.36463  | C           | 3.62876  | -2.22399 | 2.03515  |
| C           | 2.67134  | -2.64011 | 1.50228  | C           | 2.80779  | -3.11332 | 1.32659  |
| C           | 3.42774  | -2.63278 | 0.31421  | C           | 2.84130  | -3.12333 | -0.09148 |
| C           | 4.32924  | -1.57470 | -0.00919 | C           | 3.74662  | -2.33486 | -0.84376 |
| C           | 4.42164  | -0.49876 | 0.91693  | C           | 4.58618  | -1.45290 | -0.10457 |
| C           | 3.61140  | -0.45427 | 2.06487  | C           | 4.51461  | -1.37449 | 1.30035  |
| H           | 1.98231  | -3.45055 | 1.69805  | H           | 2.08348  | -3.72171 | 1.85055  |
| H           | 3.27616  | -3.43372 | -0.39601 | H           | 2.10663  | -3.72045 | -0.61275 |
| H           | 5.04508  | 0.34939  | 0.67186  | H           | 5.24479  | -0.77461 | -0.63198 |
| H           | 3.64096  | 0.41449  | 2.70913  | H           | 5.13050  | -0.65779 | 1.82554  |
| C           | 1.85971  | -1.46648 | 3.58972  | C           | 3.55229  | -2.12134 | 3.52685  |
| H           | 0.93787  | -2.03059 | 3.45904  | H           | 2.56093  | -2.38607 | 3.89311  |
| H           | 2.40941  | -1.90461 | 4.42848  | H           | 4.27369  | -2.81022 | 3.97605  |
| H           | 1.61066  | -0.44010 | 3.85361  | H           | 3.80544  | -1.11840 | 3.86972  |

|   |          |          |          |   |          |          |          |
|---|----------|----------|----------|---|----------|----------|----------|
| C | 5.19362  | -1.57547 | -1.24918 | C | 3.85931  | -2.41667 | -2.34972 |
| H | 5.33763  | -0.52601 | -1.51980 | H | 4.17545  | -1.42653 | -2.69496 |
| C | 6.56905  | -2.17287 | -0.91194 | C | 4.96440  | -3.41575 | -2.72732 |
| H | 6.47833  | -3.22313 | -0.62284 | H | 4.70149  | -4.42440 | -2.39868 |
| H | 7.22495  | -2.11860 | -1.78296 | H | 5.10076  | -3.43764 | -3.81028 |
| H | 7.05090  | -1.63623 | -0.09240 | H | 5.91982  | -3.14997 | -2.27083 |
| C | 4.56315  | -2.29101 | -2.44416 | C | 2.54397  | -2.75998 | -3.05064 |
| H | 5.18735  | -2.14528 | -3.32722 | H | 2.67127  | -2.67839 | -4.13130 |
| H | 4.48720  | -3.36842 | -2.27863 | H | 2.23055  | -3.78495 | -2.83952 |
| H | 3.56632  | -1.90806 | -2.66583 | H | 1.73961  | -2.08915 | -2.74694 |
| C | -0.31754 | -0.44793 | 0.16959  | C | -0.64282 | 0.72373  | 0.15777  |
| C | -1.12566 | -1.09115 | 1.11635  | C | -1.64434 | 0.99891  | 1.08845  |
| C | -1.36221 | -0.50587 | 2.34305  | C | -1.75026 | 2.25872  | 1.65868  |
| C | -0.77681 | 0.72232  | 2.64520  | C | -0.85489 | 3.24884  | 1.28408  |
| C | 0.00714  | 1.37445  | 1.71292  | C | 0.12112  | 2.98448  | 0.32876  |
| C | 0.24485  | 0.82472  | 0.44149  | C | 0.25119  | 1.72418  | -0.25267 |
| H | -1.56664 | -2.04923 | 0.87209  | H | -2.33921 | 0.22341  | 1.38059  |
| H | -2.00384 | -0.99878 | 3.06255  | H | -2.52817 | 2.46066  | 2.38445  |
| H | -0.95678 | 1.18548  | 3.60795  | H | -0.92318 | 4.24056  | 1.71557  |
| H | 0.40286  | 2.35079  | 1.95431  | H | 0.77279  | 3.79436  | 0.02898  |
| C | -0.04858 | -1.12814 | -1.13155 | C | -0.52817 | -0.66563 | -0.35302 |
| O | 1.15675  | -1.34040 | -1.43861 | O | 0.55455  | -1.30283 | -0.37850 |
| N | -1.05352 | -1.52181 | -1.88272 | N | -1.64363 | -1.25114 | -0.76538 |
| H | -1.99577 | -1.26929 | -1.58384 | H | -2.49295 | -0.69688 | -0.81909 |
| C | -0.86762 | -2.24440 | -3.13385 | C | -1.70197 | -2.63870 | -1.19335 |
| H | -0.13185 | -3.03645 | -3.00257 | H | -1.20472 | -3.27965 | -0.46576 |
| H | -1.82168 | -2.67782 | -3.42400 | H | -2.74910 | -2.92245 | -1.26955 |
| H | -0.52320 | -1.57423 | -3.92345 | H | -1.21803 | -2.77543 | -2.16239 |
| C | 0.94896  | 1.62242  | -0.66390 | C | 1.29327  | 1.44128  | -1.33003 |
| C | 2.33225  | 1.03682  | -0.93673 | C | 2.56480  | 0.70754  | -0.82986 |
| H | 0.30516  | 1.64714  | -1.54778 | H | 0.81933  | 0.90698  | -2.15389 |
| H | 2.48396  | 0.64998  | -1.94205 | H | 3.03128  | 0.28940  | -1.73121 |
| C | 1.22059  | 3.06964  | -0.25755 | C | 1.86662  | 2.75531  | -1.86114 |
| O | 0.40064  | 3.92500  | 0.00320  | O | 1.36541  | 3.53265  | -2.63995 |
| C | 3.29732  | 2.12336  | -0.65412 | C | 3.47928  | 1.84582  | -0.49842 |
| O | 4.50881  | 2.12547  | -0.78244 | O | 4.43996  | 1.85676  | 0.26399  |
| N | 2.58429  | 3.25033  | -0.22085 | N | 3.08925  | 2.95651  | -1.22936 |
| C | 3.21588  | 4.51886  | 0.12883  | C | 3.85718  | 4.19639  | -1.32176 |
| H | 4.19566  | 4.27742  | 0.53918  | H | 4.36295  | 4.32534  | -0.36533 |
| H | 2.60993  | 4.97182  | 0.91363  | H | 3.13865  | 5.00617  | -1.44764 |
| C | 3.34511  | 5.45878  | -1.06372 | C | 4.85751  | 4.17850  | -2.47027 |

|            |          |          |          |             |          |          |          |
|------------|----------|----------|----------|-------------|----------|----------|----------|
| H          | 2.36523  | 5.69988  | -1.47775 | H           | 4.34979  | 4.05118  | -3.42719 |
| H          | 3.82053  | 6.38988  | -0.74969 | H           | 5.40489  | 5.12241  | -2.49740 |
| H          | 3.95713  | 5.01098  | -1.84789 | H           | 5.58050  | 3.37033  | -2.34726 |
| Sb         | -5.03932 | -0.03349 | -0.14708 | O           | 1.63725  | 0.17749  | 2.01577  |
| F          | -3.48195 | -0.78496 | -0.98377 | C           | 2.08734  | 1.01465  | 2.79820  |
| F          | -6.12187 | -1.15233 | -1.23962 | O           | 3.26288  | 1.59218  | 2.68034  |
| F          | -4.95700 | -1.40745 | 1.16798  | C           | 1.31821  | 1.45116  | 4.00103  |
| F          | -3.90958 | 1.05587  | 0.92440  | H           | 0.35425  | 0.95303  | 4.03157  |
| F          | -6.58436 | 0.71503  | 0.67515  | H           | 1.89246  | 1.21707  | 4.90019  |
| F          | -5.06113 | 1.30754  | -1.49438 | H           | 1.18144  | 2.53293  | 3.97362  |
|            |          |          |          | H           | 3.71585  | 1.41100  | 1.81371  |
|            |          |          |          | Sb          | -5.66459 | -0.18713 | -0.15901 |
|            |          |          |          | F           | -4.00806 | 0.15111  | -1.08453 |
|            |          |          |          | F           | -6.05967 | 1.66787  | -0.26215 |
|            |          |          |          | F           | -6.50769 | -0.47550 | -1.83675 |
|            |          |          |          | F           | -5.18195 | -2.03243 | -0.07653 |
|            |          |          |          | F           | -7.29702 | -0.52942 | 0.75238  |
|            |          |          |          | F           | -4.76959 | 0.08943  | 1.50111  |
| <b>TS5</b> |          |          |          | <b>INT7</b> |          |          |          |
| Ru         | 2.34508  | -1.17519 | 0.51826  | Ru          | 2.59989  | -1.82787 | 0.23582  |
| C          | 3.23212  | -2.62737 | 1.96746  | C           | 3.43045  | -3.85482 | 0.28313  |
| C          | 2.35614  | -3.30754 | 1.08176  | C           | 2.59123  | -3.73200 | -0.86730 |
| C          | 2.53212  | -3.20257 | -0.31833 | C           | 2.79364  | -2.69557 | -1.79240 |
| C          | 3.56796  | -2.42425 | -0.89158 | C           | 3.84000  | -1.73976 | -1.63278 |
| C          | 4.41329  | -1.72325 | 0.01104  | C           | 4.66400  | -1.87277 | -0.49339 |
| C          | 4.25787  | -1.81936 | 1.41319  | C           | 4.47301  | -2.91540 | 0.45263  |
| H          | 1.51582  | -3.86251 | 1.47493  | H           | 1.74403  | -4.39482 | -0.98431 |
| H          | 1.78697  | -3.65310 | -0.95879 | H           | 2.07584  | -2.57262 | -2.59056 |
| H          | 5.14396  | -1.02713 | -0.37966 | H           | 5.40811  | -1.11210 | -0.28968 |
| H          | 4.88683  | -1.22486 | 2.06109  | H           | 5.07942  | -2.94301 | 1.34710  |
| C          | 3.02152  | -2.69595 | 3.44507  | C           | 3.15989  | -4.90336 | 1.31367  |
| H          | 1.96168  | -2.75486 | 3.68858  | H           | 2.09132  | -5.09372 | 1.40914  |
| H          | 3.51010  | -3.59545 | 3.83119  | H           | 3.64523  | -5.83772 | 1.01715  |
| H          | 3.45718  | -1.83472 | 3.94950  | H           | 3.55268  | -4.61032 | 2.28620  |
| C          | 3.79842  | -2.31771 | -2.38264 | C           | 4.09199  | -0.62168 | -2.61995 |
| H          | 4.20760  | -1.31828 | -2.56377 | H           | 4.55321  | 0.19366  | -2.05357 |
| C          | 4.86517  | -3.34216 | -2.80229 | C           | 5.10841  | -1.10125 | -3.66986 |
| H          | 4.51184  | -4.36154 | -2.62795 | H           | 4.70103  | -1.93019 | -4.25398 |
| H          | 5.08769  | -3.23811 | -3.86574 | H           | 5.34692  | -0.28861 | -4.35852 |
| H          | 5.79444  | -3.20533 | -2.24619 | H           | 6.03748  | -1.43722 | -3.20573 |
| C          | 2.52811  | -2.46981 | -3.22029 | C           | 2.82592  | -0.08084 | -3.28537 |

|   |          |          |          |   |          |          |          |
|---|----------|----------|----------|---|----------|----------|----------|
| H | 2.75427  | -2.26272 | -4.26717 | H | 3.07450  | 0.79458  | -3.88696 |
| H | 2.13187  | -3.48685 | -3.17168 | H | 2.37801  | -0.81619 | -3.95822 |
| H | 1.74487  | -1.78307 | -2.89684 | H | 2.07730  | 0.20597  | -2.54735 |
| C | -0.62812 | 0.93225  | 0.31383  | C | -0.28003 | 0.73280  | 1.20047  |
| C | -1.70457 | 1.03534  | 1.19570  | C | -1.22710 | 0.41446  | 2.18075  |
| C | -1.85830 | 2.16087  | 1.98960  | C | -1.41220 | 1.23119  | 3.28345  |
| C | -0.93464 | 3.19222  | 1.89064  | C | -0.65301 | 2.38767  | 3.41278  |
| C | 0.12556  | 3.10120  | 0.99630  | C | 0.27819  | 2.71491  | 2.43798  |
| C | 0.30016  | 1.97826  | 0.19115  | C | 0.48501  | 1.90381  | 1.32213  |
| H | -2.40957 | 0.21918  | 1.27803  | H | -1.80563 | -0.49510 | 2.08709  |
| H | -2.69435 | 2.22917  | 2.67399  | H | -2.14296 | 0.96525  | 4.03716  |
| H | -1.04081 | 4.08050  | 2.50232  | H | -0.79031 | 3.03944  | 4.26743  |
| H | 0.81641  | 3.92959  | 0.92070  | H | 0.84759  | 3.63253  | 2.54031  |
| C | -0.52066 | -0.31357 | -0.49211 | C | -0.11866 | -0.20286 | 0.05149  |
| O | 0.51789  | -1.02719 | -0.57035 | O | 1.00992  | -0.53503 | -0.41091 |
| N | -1.60475 | -0.68482 | -1.15035 | N | -1.22376 | -0.65729 | -0.51050 |
| H | -2.42985 | -0.09448 | -1.10159 | H | -2.12470 | -0.32548 | -0.17440 |
| C | -1.70447 | -1.93773 | -1.88084 | C | -1.22514 | -1.61142 | -1.60982 |
| H | -1.37984 | -2.76783 | -1.25365 | H | -0.88137 | -2.59080 | -1.27149 |
| H | -2.74482 | -2.08288 | -2.15941 | H | -2.24464 | -1.69135 | -1.97816 |
| H | -1.08784 | -1.91702 | -2.78061 | H | -0.56950 | -1.26762 | -2.40903 |
| C | 1.43760  | 1.87967  | -0.81097 | C | 1.47544  | 2.35760  | 0.27306  |
| C | 2.63517  | 0.98238  | -0.42631 | C | 2.94067  | 2.46382  | 0.73075  |
| H | 1.01379  | 1.52763  | -1.75691 | H | 1.41414  | 1.70263  | -0.59384 |
| H | 2.76045  | 0.21600  | -1.19390 | H | 3.57978  | 1.68761  | 0.31354  |
| C | 2.08707  | 3.22485  | -1.14186 | C | 1.15288  | 3.75856  | -0.25508 |
| O | 1.53135  | 4.22992  | -1.52728 | O | 0.08261  | 4.15969  | -0.65069 |
| C | 3.85489  | 1.83740  | -0.57480 | C | 3.40735  | 3.82789  | 0.27361  |
| O | 5.01517  | 1.51339  | -0.41585 | O | 4.52706  | 4.28536  | 0.34593  |
| N | 3.45191  | 3.11353  | -0.95627 | N | 2.31633  | 4.51179  | -0.24294 |
| C | 4.38893  | 4.20034  | -1.23392 | C | 2.38654  | 5.88433  | -0.74100 |
| H | 5.23702  | 4.06239  | -0.56443 | H | 3.14628  | 6.39519  | -0.15039 |
| H | 3.88341  | 5.12893  | -0.97064 | H | 1.41908  | 6.34257  | -0.53815 |
| C | 4.84111  | 4.22185  | -2.68875 | C | 2.71770  | 5.94908  | -2.22643 |
| H | 3.99137  | 4.35666  | -3.35933 | H | 1.95800  | 5.43673  | -2.81832 |
| H | 5.53405  | 5.05018  | -2.84721 | H | 2.75491  | 6.99095  | -2.54964 |
| H | 5.35306  | 3.29522  | -2.95206 | H | 3.68826  | 5.49480  | -2.43056 |
| O | 1.33270  | -0.37776 | 2.21762  | O | 1.41821  | -2.12886 | 2.01438  |
| C | 1.78944  | 0.67167  | 2.74817  | C | 1.96467  | -1.13055 | 2.58373  |
| O | 2.66558  | 1.39384  | 2.17482  | O | 2.84083  | -0.49852 | 1.91332  |
| C | 1.30357  | 1.07307  | 4.10640  | C | 1.61772  | -0.73315 | 3.97716  |



|            |          |          |          |             |          |          |          |
|------------|----------|----------|----------|-------------|----------|----------|----------|
| H          | 0.42098  | 0.50346  | 4.38424  | H           | 0.74743  | -1.28269 | 4.32624  |
| H          | 2.10019  | 0.88158  | 4.82998  | H           | 2.46804  | -0.95240 | 4.62705  |
| H          | 1.09139  | 2.14080  | 4.12229  | H           | 1.43028  | 0.33857  | 4.02240  |
| H          | 2.70718  | 0.99025  | 0.99572  | H           | 3.04314  | 2.40765  | 1.81501  |
| Sb         | -5.48246 | -0.18396 | -0.28822 | Sb          | -5.45939 | -0.31719 | -0.47397 |
| F          | -4.02771 | 0.74913  | -1.14974 | F           | -3.77621 | -0.03561 | 0.42058  |
| F          | -6.68247 | 1.17530  | -0.85238 | F           | -6.33620 | 0.50253  | 0.99983  |
| F          | -5.77177 | -1.13305 | -1.91279 | F           | -5.26003 | 1.37127  | -1.32131 |
| F          | -4.21858 | -1.50948 | 0.25087  | F           | -4.49874 | -1.13855 | -1.90795 |
| F          | -6.89374 | -1.13837 | 0.55589  | F           | -7.11232 | -0.60060 | -1.36734 |
| F          | -5.13236 | 0.77097  | 1.31945  | F           | -5.60286 | -2.01124 | 0.37848  |
| <b>TS6</b> |          |          |          | <b>HOAc</b> |          |          |          |
| Ru         | 0.84343  | 1.59898  | 0.68032  | H           | 1.88083  | 0.41053  | 0.00000  |
| C          | 2.50171  | 3.06192  | 0.73033  | O           | 1.25192  | -0.34352 | 0.00000  |
| C          | 2.35208  | 2.57237  | -0.58331 | O           | -0.23441 | 1.33840  | 0.00000  |
| C          | 1.10269  | 2.64446  | -1.26586 | C           | 0.00000  | 0.15164  | 0.00000  |
| C          | -0.03746 | 3.19176  | -0.65814 | C           | -1.03199 | -0.93855 | 0.00000  |
| C          | 0.08849  | 3.59466  | 0.70909  | H           | -0.90044 | -1.57167 | 0.87940  |
| C          | 1.33294  | 3.55768  | 1.38140  | H           | -2.02801 | -0.50476 | 0.00000  |
| H          | 3.18024  | 2.06858  | -1.06005 | H           | -0.90044 | -1.57167 | -0.87940 |
| H          | 1.02508  | 2.17464  | -2.23387 |             |          |          |          |
| H          | -0.79245 | 3.89948  | 1.25798  |             |          |          |          |
| H          | 1.38040  | 3.82859  | 2.42758  |             |          |          |          |
| C          | 3.80103  | 2.97001  | 1.46424  |             |          |          |          |
| H          | 4.40615  | 2.15260  | 1.08073  |             |          |          |          |
| H          | 4.35133  | 3.90704  | 1.33753  |             |          |          |          |
| H          | 3.63579  | 2.82040  | 2.53123  |             |          |          |          |
| C          | -1.38438 | 3.32529  | -1.33376 |             |          |          |          |
| H          | -2.12302 | 2.90453  | -0.64303 |             |          |          |          |
| C          | -1.69883 | 4.82249  | -1.50571 |             |          |          |          |
| H          | -0.97534 | 5.29397  | -2.17523 |             |          |          |          |
| H          | -2.69197 | 4.94495  | -1.94095 |             |          |          |          |
| H          | -1.67999 | 5.35844  | -0.55528 |             |          |          |          |
| C          | -1.49739 | 2.59433  | -2.66906 |             |          |          |          |
| H          | -2.51605 | 2.68692  | -3.04940 |             |          |          |          |
| H          | -0.83130 | 3.03292  | -3.41715 |             |          |          |          |
| H          | -1.26138 | 1.53776  | -2.56080 |             |          |          |          |
| Sb         | 3.39466  | -1.30215 | -0.47710 |             |          |          |          |
| F          | 4.39058  | 0.17596  | 0.19136  |             |          |          |          |
| F          | 3.06967  | -0.32047 | -2.08028 |             |          |          |          |
| F          | 2.36652  | -2.75690 | -1.13432 |             |          |          |          |

|   |          |          |          |
|---|----------|----------|----------|
| F | 3.64998  | -2.22178 | 1.16128  |
| F | 4.96920  | -2.05730 | -1.22229 |
| F | 1.78710  | -0.51399 | 0.26903  |
| C | -1.20621 | -2.13544 | -0.02531 |
| C | -0.42875 | -3.22143 | 0.38491  |
| C | -0.85979 | -4.05546 | 1.40697  |
| C | -2.08677 | -3.81855 | 2.01286  |
| C | -2.85944 | -2.73759 | 1.60930  |
| C | -2.42988 | -1.87066 | 0.60539  |
| H | 0.52434  | -3.39460 | -0.09628 |
| H | -0.24210 | -4.88709 | 1.72407  |
| H | -2.44399 | -4.47224 | 2.79994  |
| H | -3.81796 | -2.57245 | 2.08866  |
| C | -0.69304 | -1.27669 | -1.14488 |
| O | -0.57308 | -0.04829 | -1.05196 |
| N | -0.37297 | -1.93264 | -2.26834 |
| H | -0.52160 | -2.93101 | -2.30644 |
| C | 0.22320  | -1.26359 | -3.41283 |
| H | 0.57901  | -2.02174 | -4.10761 |
| H | -0.50634 | -0.63161 | -3.92337 |
| H | 1.06474  | -0.65266 | -3.09202 |
| C | -3.30767 | -0.71091 | 0.18609  |
| C | -3.94803 | 0.11734  | 1.31008  |
| H | -2.72148 | -0.05093 | -0.45192 |
| H | -3.51005 | 1.10920  | 1.40493  |
| C | -4.49689 | -1.16538 | -0.66003 |
| O | -4.47273 | -1.90683 | -1.61724 |
| C | -5.41272 | 0.22466  | 0.95102  |
| O | -6.26948 | 0.86147  | 1.52579  |
| N | -5.64429 | -0.55917 | -0.17041 |
| C | -6.96022 | -0.71390 | -0.78635 |
| H | -7.69446 | -0.64192 | 0.01530  |
| H | -6.99734 | -1.71890 | -1.20551 |
| C | -7.22460 | 0.33354  | -1.86080 |
| H | -6.49172 | 0.26060  | -2.66555 |
| H | -8.21671 | 0.18045  | -2.28947 |
| H | -7.18675 | 1.33997  | -1.44156 |
| O | 1.18749  | 0.64521  | 2.57533  |
| C | -0.02771 | 0.28063  | 2.66133  |
| O | -0.81821 | 0.71810  | 1.77186  |
| C | -0.48859 | -0.64322 | 3.73696  |

|                |          |          |          |                          |          |                   |
|----------------|----------|----------|----------|--------------------------|----------|-------------------|
| H              | 0.23965  | -0.68126 | 4.54430  |                          |          |                   |
| H              | -1.45987 | -0.32508 | 4.11449  |                          |          |                   |
| H              | -0.60550 | -1.64226 | 3.31256  |                          |          |                   |
| H              | -3.86947 | -0.35716 | 2.28875  |                          |          |                   |
| <b>Pre-CAT</b> |          |          |          | <b>AgSbF<sub>6</sub></b> |          |                   |
| Ru             | -1.84608 | 0.36115  | -0.45981 | Ag                       | -2.35344 | -0.00000 0.00001  |
| C              | -2.60071 | 2.43949  | -0.34519 | Sb                       | 1.09622  | 0.00000 0.00000   |
| C              | -3.56202 | 1.61898  | -0.97203 | F                        | -0.35797 | 1.28690 0.23265   |
| C              | -4.02539 | 0.42582  | -0.34576 | F                        | -0.35800 | -1.28690 -0.23251 |
| C              | -3.53503 | 0.02268  | 0.91356  | F                        | 2.38306  | -1.35471 -0.25112 |
| C              | -2.56564 | 0.86791  | 1.54741  | F                        | 2.38313  | 1.35468 0.25095   |
| C              | -2.10995 | 2.04561  | 0.93967  | F                        | 1.01388  | 0.34429 -1.85713  |
| H              | -3.88618 | 1.84716  | -1.97766 | F                        | 1.01416  | -0.34429 1.85711  |
| H              | -4.68106 | -0.22521 | -0.90389 |                          |          |                   |
| H              | -2.08795 | 0.53305  | 2.45814  |                          |          |                   |
| H              | -1.29621 | 2.59267  | 1.39345  |                          |          |                   |
| C              | -2.06208 | 3.66006  | -1.02214 |                          |          |                   |
| H              | -2.16773 | 3.58993  | -2.10428 |                          |          |                   |
| H              | -2.61618 | 4.53984  | -0.68155 |                          |          |                   |
| H              | -1.01016 | 3.80614  | -0.78086 |                          |          |                   |
| C              | -3.96029 | -1.25922 | 1.59154  |                          |          |                   |
| H              | -3.11397 | -1.57481 | 2.20820  |                          |          |                   |
| C              | -5.14693 | -0.96879 | 2.52400  |                          |          |                   |
| H              | -6.02041 | -0.64578 | 1.95207  |                          |          |                   |
| H              | -5.41925 | -1.86975 | 3.07718  |                          |          |                   |
| H              | -4.90809 | -0.18700 | 3.24781  |                          |          |                   |
| C              | -4.27807 | -2.39635 | 0.62049  |                          |          |                   |
| H              | -4.45439 | -3.31673 | 1.18007  |                          |          |                   |
| H              | -5.18106 | -2.19361 | 0.03975  |                          |          |                   |
| H              | -3.45466 | -2.56649 | -0.07387 |                          |          |                   |
| Cl             | -1.93820 | -0.94415 | -2.52350 |                          |          |                   |
| Cl             | -0.47428 | -1.49706 | 0.50025  |                          |          |                   |
| Ru             | 1.76162  | -0.42501 | 0.15927  |                          |          |                   |
| C              | 2.55026  | -2.33776 | -0.67494 |                          |          |                   |
| C              | 2.81358  | -1.29085 | -1.57818 |                          |          |                   |
| C              | 3.47655  | -0.10631 | -1.14699 |                          |          |                   |
| C              | 3.91396  | 0.06109  | 0.18527  |                          |          |                   |
| C              | 3.64686  | -1.01076 | 1.09406  |                          |          |                   |
| C              | 2.97752  | -2.17615 | 0.68213  |                          |          |                   |
| H              | 2.42479  | -1.34284 | -2.58583 |                          |          |                   |
| H              | 3.56273  | 0.71300  | -1.84561 |                          |          |                   |

|                           |          |          |          |                                          |          |         |          |
|---------------------------|----------|----------|----------|------------------------------------------|----------|---------|----------|
| H                         | 3.87312  | -0.87854 | 2.14341  |                                          |          |         |          |
| H                         | 2.71771  | -2.92697 | 1.41614  |                                          |          |         |          |
| C                         | 1.79279  | -3.55509 | -1.10109 |                                          |          |         |          |
| H                         | 1.22533  | -3.97368 | -0.27145 |                                          |          |         |          |
| H                         | 1.10044  | -3.31937 | -1.90797 |                                          |          |         |          |
| H                         | 2.49470  | -4.31607 | -1.45495 |                                          |          |         |          |
| C                         | 4.59664  | 1.31292  | 0.68276  |                                          |          |         |          |
| H                         | 4.27921  | 1.43678  | 1.72149  |                                          |          |         |          |
| C                         | 4.19487  | 2.57744  | -0.07500 |                                          |          |         |          |
| H                         | 4.55558  | 2.56718  | -1.10655 |                                          |          |         |          |
| H                         | 3.11184  | 2.70339  | -0.08472 |                                          |          |         |          |
| H                         | 4.63571  | 3.44949  | 0.41117  |                                          |          |         |          |
| C                         | 6.11940  | 1.10894  | 0.66198  |                                          |          |         |          |
| H                         | 6.62109  | 1.98001  | 1.08796  |                                          |          |         |          |
| H                         | 6.41713  | 0.23195  | 1.24045  |                                          |          |         |          |
| H                         | 6.48072  | 0.97747  | -0.36122 |                                          |          |         |          |
| Cl                        | 0.40671  | 1.15465  | -1.21305 |                                          |          |         |          |
| Cl                        | 1.24667  | 0.98893  | 2.10086  |                                          |          |         |          |
| <b>(AgCl)<sub>4</sub></b> |          |          |          | <b>CAT-(SbF<sub>6</sub>)<sub>2</sub></b> |          |         |          |
| Ag                        | 1.13834  | 1.13834  | 1.13834  | Ru                                       | -0.32732 | 0.90057 | 0.40233  |
| Cl                        | -1.48766 | 1.48766  | 1.48766  | C                                        | 0.13587  | 1.80134 | 2.34650  |
| Cl                        | 1.48766  | -1.48766 | 1.48766  | C                                        | 1.15085  | 2.13330 | 1.42258  |
| Cl                        | 1.48766  | 1.48766  | -1.48766 | C                                        | 0.84231  | 2.71388 | 0.16287  |
| Ag                        | -1.13834 | -1.13834 | 1.13834  | C                                        | -0.49292 | 2.99420 | -0.20747 |
| Ag                        | -1.13834 | 1.13834  | -1.13834 | C                                        | -1.51884 | 2.68216 | 0.73796  |
| Ag                        | 1.13834  | -1.13834 | -1.13834 | C                                        | -1.21435 | 2.09670 | 1.97910  |
| Cl                        | -1.48766 | -1.48766 | -1.48766 | H                                        | 2.16867  | 1.82937 | 1.61996  |
|                           |          |          |          | H                                        | 1.64532  | 2.83141 | -0.55099 |
|                           |          |          |          | H                                        | -2.55691 | 2.78137 | 0.44749  |
|                           |          |          |          | H                                        | -2.02463 | 1.76007 | 2.61308  |
|                           |          |          |          | C                                        | 0.45017  | 1.06639 | 3.60843  |
|                           |          |          |          | H                                        | 0.64093  | 1.79025 | 4.40643  |
|                           |          |          |          | H                                        | -0.38636 | 0.43945 | 3.91586  |
|                           |          |          |          | H                                        | 1.33641  | 0.44646 | 3.48319  |
|                           |          |          |          | C                                        | -0.84244 | 3.49280 | -1.58989 |
|                           |          |          |          | H                                        | -1.93169 | 3.45156 | -1.67286 |
|                           |          |          |          | C                                        | -0.40125 | 4.95779 | -1.72741 |
|                           |          |          |          | H                                        | 0.68635  | 5.04708 | -1.67703 |
|                           |          |          |          | H                                        | -0.72745 | 5.34869 | -2.69217 |
|                           |          |          |          | H                                        | -0.83250 | 5.58398 | -0.94424 |
|                           |          |          |          | C                                        | -0.25295 | 2.61012 | -2.69635 |

|                                            |    |          |          |          |
|--------------------------------------------|----|----------|----------|----------|
|                                            | H  | -0.54664 | 3.00339  | -3.67029 |
|                                            | H  | 0.83813  | 2.58980  | -2.66508 |
|                                            | H  | -0.62055 | 1.58657  | -2.61793 |
|                                            | Sb | -2.61745 | -1.36640 | -0.18235 |
|                                            | F  | -1.63484 | 0.06760  | -1.15143 |
|                                            | F  | -1.15716 | -1.00278 | 1.11711  |
|                                            | F  | -3.36508 | -2.65221 | 0.95576  |
|                                            | F  | -3.90574 | -1.46478 | -1.53799 |
|                                            | F  | -3.55187 | 0.03552  | 0.67170  |
|                                            | F  | -1.50679 | -2.62034 | -1.02046 |
|                                            | Sb | 2.89174  | -0.96305 | -0.22770 |
|                                            | F  | 0.96562  | -0.49974 | -0.53416 |
|                                            | F  | 3.04847  | -1.25020 | -2.08313 |
|                                            | F  | 4.70973  | -1.33383 | 0.09899  |
|                                            | F  | 2.55492  | -0.59859 | 1.60724  |
|                                            | F  | 3.23110  | 0.88781  | -0.48729 |
|                                            | F  | 2.34337  | -2.74675 | 0.03001  |
| <b>Cu(OAc)<sub>2</sub>·H<sub>2</sub>O</b>  |    |          |          |          |
|                                            | Cu | 0.00637  | -0.03791 | 0.00008  |
|                                            | O  | 1.69063  | -0.27551 | -1.08770 |
|                                            | C  | 2.34378  | -0.34961 | 0.00050  |
|                                            | O  | 1.69059  | -0.27497 | 1.08854  |
|                                            | C  | 3.83280  | -0.49323 | 0.00003  |
|                                            | H  | 4.16352  | -1.03062 | -0.88723 |
|                                            | H  | 4.16818  | -0.99870 | 0.90395  |
|                                            | H  | 4.27790  | 0.50513  | -0.02003 |
|                                            | O  | -1.68354 | -0.27310 | -1.08850 |
|                                            | C  | -2.33489 | -0.35864 | -0.00012 |
|                                            | O  | -1.68372 | -0.27187 | 1.08832  |
|                                            | C  | -3.82127 | -0.53085 | -0.00002 |
|                                            | H  | -4.14456 | -1.05597 | -0.89715 |
|                                            | H  | -4.28680 | 0.45841  | 0.00351  |
|                                            | H  | -4.14359 | -1.06149 | 0.89424  |
|                                            | O  | 0.04250  | 2.26496  | -0.00046 |
|                                            | H  | -0.39474 | 2.65997  | -0.77323 |
|                                            | H  | -0.39892 | 2.66037  | 0.76973  |
| <b>CuOAcSbF<sub>6</sub>·H<sub>2</sub>O</b> |    |          |          |          |
|                                            | Cu | -1.59125 | 0.56947  | -0.27584 |
|                                            | O  | -3.42907 | 0.60208  | 0.47522  |
|                                            | C  | -3.56940 | -0.60071 | 0.07697  |
|                                            | O  | -2.56899 | -1.10887 | -0.52821 |
|                                            | C  | -4.81479 | -1.37555 | 0.32120  |
|                                            | H  | -4.66693 | -1.99465 | 1.21027  |
|                                            | H  | -5.01464 | -2.03762 | -0.52047 |
|                                            | H  | -5.65444 | -0.70609 | 0.49636  |
|                                            | Sb | 1.65488  | -0.21926 | 0.05031  |
|                                            | F  | 0.14062  | 0.11185  | -1.20688 |
|                                            | F  | 0.24715  | -0.24359 | 1.34726  |
|                                            | F  | 2.98929  | -0.44025 | 1.35198  |
|                                            | F  | 2.86263  | -0.08374 | -1.38182 |
|                                            | F  | 1.43836  | -2.06333 | -0.23551 |
|                                            | F  | 1.68608  | 1.68686  | 0.26024  |
|                                            | O  | -0.94314 | 2.40531  | 0.01946  |
|                                            | H  | -1.38119 | 2.89772  | 0.73938  |
|                                            | H  | 0.02196  | 2.46724  | 0.16960  |

**Table S3** Coordinates of all Stationary points for the reaction of **CAT**+**1a**+**2a**, computed at B3LYP+IDSCRF/ TZP-DKH(-dfg) level in DCE solvent

|           |          |          |          |            |          |          |          |
|-----------|----------|----------|----------|------------|----------|----------|----------|
| <b>1a</b> |          |          |          | <b>2a</b>  |          |          |          |
| C         | 0.24463  | 0.10924  | -0.04174 | C          | -1.94984 | -0.66470 | 0.24980  |
| C         | 0.79291  | -1.16629 | -0.20067 | C          | -1.94980 | 0.66480  | 0.24984  |
| C         | 2.17007  | -1.35114 | -0.15164 | H          | -2.76450 | -1.35002 | 0.43347  |
| C         | 3.01294  | -0.26526 | 0.06296  | H          | -2.76440 | 1.35017  | 0.43354  |
| C         | 2.47378  | 1.00910  | 0.21840  | C          | -0.56381 | -1.14069 | -0.06591 |
| C         | 1.09904  | 1.19601  | 0.15808  | O          | -0.17275 | -2.28281 | -0.16312 |
| H         | 0.15234  | -2.02088 | -0.39056 | C          | -0.56376 | 1.14071  | -0.06599 |
| H         | 2.58464  | -2.34405 | -0.28769 | O          | -0.17261 | 2.28280  | -0.16312 |
| H         | 4.08701  | -0.41081 | 0.10354  | N          | 0.21453  | -0.00001 | -0.23994 |
| H         | 3.12711  | 1.85898  | 0.38354  | C          | 1.63770  | -0.00006 | -0.56482 |
| H         | 0.67088  | 2.18509  | 0.26613  | H          | 1.82373  | 0.88276  | -1.17657 |
| C         | -1.23225 | 0.37590  | -0.10452 | H          | 1.82369  | -0.88294 | -1.17650 |
| O         | -1.67104 | 1.48733  | -0.41050 | C          | 2.53170  | -0.00003 | 0.67104  |
| N         | -2.05118 | -0.65715 | 0.18867  | H          | 2.35463  | -0.88621 | 1.28227  |
| H         | -1.65996 | -1.50922 | 0.56761  | H          | 3.58028  | -0.00007 | 0.36733  |
| C         | -3.49759 | -0.51087 | 0.18703  | H          | 2.35467  | 0.88621  | 1.28220  |
| H         | -3.83083 | 0.18394  | 0.96359  |            |          |          |          |
| H         | -3.84131 | -0.13380 | -0.77793 |            |          |          |          |
| H         | -3.94444 | -1.48797 | 0.36772  |            |          |          |          |
| <b>3a</b> |          |          |          | <b>CAT</b> |          |          |          |
| C         | -2.11044 | 0.38524  | 0.08891  | Ru         | 1.26352  | 0.55495  | 0.19812  |
| C         | -3.13214 | 1.33038  | -0.04874 | C          | 1.67864  | 0.15355  | 2.35734  |
| C         | -2.84527 | 2.68321  | -0.16209 | C          | 1.09022  | -0.98357 | 1.77193  |
| C         | -1.52121 | 3.10400  | -0.15270 | C          | 1.62363  | -1.59057 | 0.59942  |
| C         | -0.50177 | 2.17032  | -0.02666 | C          | 2.76581  | -1.06421 | -0.03537 |
| C         | -0.77092 | 0.80680  | 0.10353  | C          | 3.35155  | 0.11271  | 0.53195  |
| H         | -4.16428 | 1.00067  | -0.04113 | C          | 2.81929  | 0.70470  | 1.69750  |
| H         | -3.65021 | 3.40234  | -0.25357 | H          | 0.15502  | -1.35937 | 2.17049  |
| H         | -1.28024 | 4.15621  | -0.24560 | H          | 1.07620  | -2.40931 | 0.15195  |
| H         | 0.52779  | 2.51236  | -0.03390 | H          | 4.17628  | 0.59702  | 0.02220  |
| C         | -2.47695 | -1.06078 | 0.28518  | H          | 3.23535  | 1.64214  | 2.04927  |
| O         | -1.97856 | -1.74449 | 1.18099  | C          | 1.09020  | 0.81177  | 3.56723  |
| N         | -3.40502 | -1.55236 | -0.56292 | H          | 1.56917  | 0.41211  | 4.46790  |
| H         | -3.69366 | -0.98843 | -1.35012 | H          | 1.25858  | 1.89025  | 3.54811  |
| C         | -3.87369 | -2.92576 | -0.47535 | H          | 0.01865  | 0.61813  | 3.63626  |
| H         | -4.18162 | -3.15317 | 0.54495  | C          | 3.34847  | -1.64434 | -1.30410 |
| H         | -4.72578 | -3.04623 | -1.14151 | H          | 3.78104  | -0.80494 | -1.85907 |
| H         | -3.09363 | -3.63496 | -0.76238 | C          | 4.49689  | -2.59928 | -0.92707 |
| C         | 0.38241  | -0.16287 | 0.25430  | H          | 4.11724  | -3.45914 | -0.36761 |
| C         | 1.12098  | -0.11677 | 1.60547  | H          | 4.98125  | -2.96829 | -1.83428 |

|            |          |          |          |             |          |          |          |
|------------|----------|----------|----------|-------------|----------|----------|----------|
| H          | 0.02243  | -1.17874 | 0.08941  | H           | 5.25308  | -2.09928 | -0.31655 |
| H          | 0.88914  | -0.96428 | 2.24948  | C           | 2.32455  | -2.33449 | -2.20739 |
| C          | 1.49312  | 0.03897  | -0.77750 | H           | 2.80690  | -2.62631 | -3.14294 |
| O          | 1.36633  | 0.16918  | -1.97494 | H           | 1.92590  | -3.24270 | -1.74704 |
| C          | 2.59403  | -0.11101 | 1.25745  | H           | 1.48812  | -1.67367 | -2.44775 |
| O          | 3.53226  | -0.17357 | 2.02186  | O           | 1.35558  | 1.48600  | -1.73028 |
| N          | 2.71534  | 0.00402  | -0.12133 | C           | 0.94443  | 2.59081  | -1.24799 |
| C          | 4.00206  | 0.07791  | -0.81332 | O           | 0.82115  | 2.64678  | 0.01826  |
| H          | 4.69503  | 0.57700  | -0.13689 | C           | 0.59989  | 3.74542  | -2.12274 |
| H          | 3.85329  | 0.70840  | -1.68930 | H           | -0.45486 | 3.66575  | -2.40710 |
| C          | 4.53187  | -1.29428 | -1.21647 | H           | 1.20296  | 3.72447  | -3.03099 |
| H          | 3.84258  | -1.79580 | -1.89723 | H           | 0.74243  | 4.68387  | -1.58648 |
| H          | 5.49082  | -1.18228 | -1.72555 | Sb          | -2.57041 | -0.40635 | -0.07667 |
| H          | 4.68323  | -1.92789 | -0.34155 | F           | -0.85282 | 0.48013  | -0.41939 |
| H          | 0.90017  | 0.79207  | 2.16929  | F           | -2.72085 | -0.69946 | -1.94167 |
|            |          |          |          | F           | -4.23015 | -1.25770 | 0.26046  |
|            |          |          |          | F           | -2.29551 | -0.07282 | 1.77124  |
|            |          |          |          | F           | -1.62311 | -2.04436 | 0.10157  |
|            |          |          |          | F           | -3.39452 | 1.28734  | -0.27241 |
| <b>TS1</b> |          |          |          | <b>INT1</b> |          |          |          |
| Ru         | 0.52155  | 1.03877  | -0.06380 | Ru          | -3.16402 | -0.01268 | 0.13695  |
| C          | 0.60553  | 0.57109  | -2.25771 | C           | -3.78150 | 0.95969  | -1.77330 |
| C          | -0.40345 | 1.53921  | -1.99623 | C           | -2.59331 | 0.23470  | -1.98816 |
| C          | -0.10968 | 2.71633  | -1.27308 | C           | -2.49844 | -1.14464 | -1.64134 |
| C          | 1.20184  | 2.97742  | -0.77795 | C           | -3.58470 | -1.83674 | -1.07519 |
| C          | 2.19201  | 1.98233  | -1.02231 | C           | -4.78591 | -1.09067 | -0.84522 |
| C          | 1.90912  | 0.81292  | -1.77296 | C           | -4.88575 | 0.26891  | -1.18311 |
| H          | -1.42631 | 1.32102  | -2.26777 | H           | -1.71520 | 0.74682  | -2.35674 |
| H          | -0.92468 | 3.37773  | -1.01627 | H           | -1.53988 | -1.63397 | -1.74317 |
| H          | 3.16962  | 2.09334  | -0.57121 | H           | -5.60795 | -1.56436 | -0.32389 |
| H          | 2.66742  | 0.04908  | -1.86901 | H           | -5.78455 | 0.81489  | -0.92944 |
| C          | 0.25966  | -0.70699 | -2.95509 | C           | -3.88594 | 2.41726  | -2.09989 |
| H          | 0.93523  | -1.50936 | -2.66552 | H           | -4.37799 | 2.53383  | -3.07003 |
| H          | -0.76603 | -1.00069 | -2.73915 | H           | -4.48506 | 2.94536  | -1.35775 |
| H          | 0.34940  | -0.55623 | -4.03542 | H           | -2.90368 | 2.88256  | -2.15755 |
| C          | 1.57140  | 4.22673  | -0.00863 | C           | -3.53707 | -3.29957 | -0.68774 |
| H          | 2.30912  | 3.92161  | 0.74040  | H           | -4.20898 | -3.41372 | 0.16870  |
| C          | 2.25854  | 5.21366  | -0.97127 | C           | -4.10377 | -4.14102 | -1.84634 |
| H          | 1.56805  | 5.54054  | -1.75258 | H           | -3.46481 | -4.06628 | -2.72951 |
| H          | 2.58881  | 6.09684  | -0.42176 | H           | -4.15567 | -5.19092 | -1.55307 |
| H          | 3.13101  | 4.76891  | -1.45331 | H           | -5.10844 | -3.81858 | -2.12635 |

|            |          |          |          |             |          |          |          |
|------------|----------|----------|----------|-------------|----------|----------|----------|
| C          | 0.40238  | 4.89390  | 0.71898  | C           | -2.15436 | -3.79838 | -0.26555 |
| H          | 0.77774  | 5.71856  | 1.32687  | H           | -2.22948 | -4.83053 | 0.07965  |
| H          | -0.32225 | 5.31475  | 0.01776  | H           | -1.44279 | -3.78618 | -1.09421 |
| H          | -0.11709 | 4.19486  | 1.37488  | H           | -1.74653 | -3.20023 | 0.55054  |
| O          | -0.49004 | 1.65737  | 1.74724  | O           | -3.71001 | -0.56999 | 2.14609  |
| C          | 0.43959  | 1.19414  | 2.47695  | C           | -3.77674 | 0.64883  | 2.49482  |
| O          | 1.47717  | 0.77116  | 1.88214  | O           | -3.62575 | 1.52023  | 1.57950  |
| C          | 0.30600  | 1.13219  | 3.96328  | C           | -3.99021 | 1.04361  | 3.91883  |
| H          | -0.16463 | 0.18343  | 4.23231  | H           | -3.01527 | 1.15913  | 4.39884  |
| H          | -0.33021 | 1.94018  | 4.32018  | H           | -4.54347 | 0.27008  | 4.44812  |
| H          | 1.28587  | 1.17630  | 4.43504  | H           | -4.51323 | 1.99667  | 3.97494  |
| Sb         | -3.22775 | -0.76523 | -0.01426 | Sb          | 4.81461  | -0.42176 | -0.03107 |
| F          | -1.35286 | -0.45269 | 0.30343  | F           | 5.57460  | 1.13984  | -0.80324 |
| F          | -3.55966 | 1.09384  | 0.22024  | F           | 3.68336  | 0.69103  | 1.06607  |
| F          | -5.07406 | -1.06969 | -0.34936 | F           | 3.99482  | -1.94971 | 0.76530  |
| F          | -2.84735 | -2.60813 | -0.28104 | F           | 5.89384  | -1.53684 | -1.12685 |
| F          | -2.91846 | -0.45561 | -1.87586 | F           | 3.44335  | -0.40902 | -1.36164 |
| F          | -3.46798 | -1.07291 | 1.84338  | F           | 6.13566  | -0.40939 | 1.33328  |
| C          | 3.36642  | -2.40235 | 0.17057  | C           | 0.05994  | 1.76086  | 0.04219  |
| C          | 4.19514  | -3.29546 | -0.51386 | C           | 1.10493  | 1.87959  | -0.87827 |
| C          | 5.57024  | -3.09315 | -0.54500 | C           | 1.26992  | 3.06479  | -1.58507 |
| C          | 6.13040  | -2.00463 | 0.11522  | C           | 0.41195  | 4.13712  | -1.36419 |
| C          | 5.30911  | -1.11118 | 0.79726  | C           | -0.62296 | 4.02218  | -0.43997 |
| C          | 3.93335  | -1.30153 | 0.81726  | C           | -0.80852 | 2.83467  | 0.25484  |
| H          | 3.77062  | -4.13787 | -1.04761 | H           | 1.77985  | 1.05169  | -1.05509 |
| H          | 6.20304  | -3.78443 | -1.08878 | H           | 2.07440  | 3.14976  | -2.30549 |
| H          | 7.20297  | -1.85134 | 0.09547  | H           | 0.55092  | 5.06328  | -1.90923 |
| H          | 5.74272  | -0.26387 | 1.31558  | H           | -1.28492 | 4.86051  | -0.25846 |
| H          | 3.28536  | -0.61172 | 1.34049  | H           | -1.60984 | 2.74161  | 0.97624  |
| C          | 1.87492  | -2.56146 | 0.22156  | C           | -0.12808 | 0.51461  | 0.83178  |
| O          | 1.12070  | -1.58578 | 0.27222  | O           | -1.26348 | 0.02915  | 1.09347  |
| N          | 1.40870  | -3.82813 | 0.20480  | N           | 0.95927  | -0.07924 | 1.30092  |
| H          | 2.07350  | -4.58292 | 0.29991  | H           | 1.86066  | 0.37018  | 1.17423  |
| C          | -0.00721 | -4.15390 | 0.26726  | C           | 0.93788  | -1.32623 | 2.05245  |
| H          | -0.59052 | -3.28804 | -0.02942 | H           | 0.18847  | -1.99535 | 1.63552  |
| H          | -0.22126 | -4.98451 | -0.40598 | H           | 1.92247  | -1.78160 | 1.97500  |
| H          | -0.30259 | -4.43941 | 1.28031  | H           | 0.69695  | -1.14794 | 3.10256  |
| <b>TS2</b> |          |          |          | <b>INT2</b> |          |          |          |
| Ru         | 3.16182  | -0.10310 | 0.04015  | Ru          | 3.05344  | -0.08447 | 0.04040  |
| C          | 4.23414  | -1.11305 | -1.61502 | C           | 4.28174  | -1.00077 | -1.58871 |
| C          | 3.32876  | -0.16232 | -2.18245 | C           | 3.33190  | -0.09410 | -2.16178 |



|   |          |          |          |   |          |          |          |
|---|----------|----------|----------|---|----------|----------|----------|
| C | 3.33348  | 1.17373  | -1.76367 | C | 3.24530  | 1.23994  | -1.74377 |
| C | 4.23774  | 1.62597  | -0.75205 | C | 4.07974  | 1.72590  | -0.69188 |
| C | 5.16164  | 0.67760  | -0.22722 | C | 5.01031  | 0.81973  | -0.11615 |
| C | 5.17533  | -0.66735 | -0.65882 | C | 5.12889  | -0.51800 | -0.57451 |
| H | 2.57009  | -0.50077 | -2.87581 | H | 2.62443  | -0.46570 | -2.89231 |
| H | 2.56897  | 1.83953  | -2.13902 | H | 2.47000  | 1.86772  | -2.15922 |
| H | 5.80204  | 0.97297  | 0.59440  | H | 5.59510  | 1.14111  | 0.73629  |
| H | 5.82540  | -1.38110 | -0.17266 | H | 5.79442  | -1.20054 | -0.06538 |
| C | 4.17472  | -2.55543 | -2.01032 | C | 4.35856  | -2.42590 | -2.04096 |
| H | 3.18199  | -2.83106 | -2.36200 | H | 3.41881  | -2.75491 | -2.48122 |
| H | 4.88230  | -2.72666 | -2.82758 | H | 5.13583  | -2.51396 | -2.80612 |
| H | 4.45193  | -3.20126 | -1.17845 | H | 4.61641  | -3.08289 | -1.21183 |
| C | 4.28166  | 3.05334  | -0.25346 | C | 4.03237  | 3.14875  | -0.17912 |
| H | 4.58168  | 3.00353  | 0.79786  | H | 4.24532  | 3.09762  | 0.89315  |
| C | 5.38127  | 3.81045  | -1.02291 | C | 5.16931  | 3.94619  | -0.84793 |
| H | 5.13924  | 3.87631  | -2.08641 | H | 5.01562  | 4.01439  | -1.92754 |
| H | 5.46959  | 4.82586  | -0.63324 | H | 5.19180  | 4.96019  | -0.44542 |
| H | 6.35343  | 3.32419  | -0.92452 | H | 6.14438  | 3.48932  | -0.67074 |
| C | 2.94557  | 3.79317  | -0.33121 | C | 2.68796  | 3.85185  | -0.36526 |
| H | 3.04583  | 4.77227  | 0.13932  | H | 2.72136  | 4.82978  | 0.11714  |
| H | 2.63389  | 3.96283  | -1.36462 | H | 2.45946  | 4.02070  | -1.42027 |
| H | 2.15849  | 3.24479  | 0.18521  | H | 1.87645  | 3.27944  | 0.08172  |
| O | 3.63168  | -2.52415 | 1.67663  | O | 4.01567  | -2.73117 | 1.51643  |
| C | 3.66971  | -1.56684 | 2.45766  | C | 3.76894  | -1.84044 | 2.32699  |
| O | 3.43857  | -0.34441 | 2.09369  | O | 3.26979  | -0.67531 | 2.01960  |
| C | 4.00302  | -1.74230 | 3.92214  | C | 4.01987  | -2.01773 | 3.81138  |
| H | 3.37118  | -1.10715 | 4.54215  | H | 3.14711  | -1.70707 | 4.38619  |
| H | 5.03948  | -1.43910 | 4.08883  | H | 4.85293  | -1.37975 | 4.11480  |
| H | 3.89174  | -2.78499 | 4.21079  | H | 4.26389  | -3.05455 | 4.03050  |
| C | -0.03320 | -0.83500 | -0.22377 | C | 0.04183  | -0.68514 | -0.23685 |
| C | -1.10824 | -1.05956 | -1.08257 | C | -0.93760 | -0.83364 | -1.21446 |
| C | -1.25013 | -2.29632 | -1.70019 | C | -0.98513 | -2.00325 | -1.96516 |
| C | -0.33343 | -3.31486 | -1.45614 | C | -0.07170 | -3.02981 | -1.73794 |
| C | 0.73826  | -3.09626 | -0.59643 | C | 0.90072  | -2.89078 | -0.75485 |
| C | 0.88637  | -1.85953 | 0.01739  | C | 0.96105  | -1.71890 | -0.00673 |
| H | -1.82569 | -0.27622 | -1.28543 | H | -1.64897 | -0.04123 | -1.40639 |
| H | -2.08539 | -2.46355 | -2.36888 | H | -1.74550 | -2.11425 | -2.72854 |
| H | -0.45747 | -4.28046 | -1.93153 | H | -0.12651 | -3.94107 | -2.32110 |
| H | 1.44243  | -3.89005 | -0.38026 | H | 1.59662  | -3.69376 | -0.54696 |
| H | 1.66945  | -1.74440 | 0.76821  | H | 1.62219  | -1.67330 | 0.85916  |
| C | 0.19582  | 0.45865  | 0.46407  | C | 0.19685  | 0.54127  | 0.58512  |

|            |          |          |          |             |          |          |          |
|------------|----------|----------|----------|-------------|----------|----------|----------|
| O          | 1.36923  | 0.83727  | 0.73962  | O           | 1.35550  | 0.92042  | 0.91695  |
| N          | -0.84052 | 1.20093  | 0.81440  | N           | -0.87489 | 1.20415  | 0.97699  |
| H          | -1.78401 | 0.86217  | 0.64138  | H           | -1.79813 | 0.84811  | 0.73650  |
| C          | -0.70151 | 2.47788  | 1.50113  | C           | -0.80480 | 2.40556  | 1.79852  |
| H          | -0.24622 | 3.22443  | 0.84892  | H           | -0.37180 | 3.23624  | 1.23961  |
| H          | -1.69423 | 2.81568  | 1.78799  | H           | -1.81623 | 2.66808  | 2.09831  |
| H          | -0.08328 | 2.36971  | 2.39209  | H           | -0.19714 | 2.22772  | 2.68546  |
| Sb         | -5.31429 | 0.19853  | 0.02836  | Sb          | -5.27951 | 0.10544  | 0.02791  |
| F          | -3.45915 | 0.54454  | 0.38721  | F           | -3.42967 | 0.46677  | 0.40066  |
| F          | -5.26982 | 1.55008  | -1.31092 | F           | -5.23509 | 1.45787  | -1.31048 |
| F          | -4.77745 | -1.09002 | -1.26783 | F           | -4.72892 | -1.17846 | -1.26566 |
| F          | -5.29137 | -1.14359 | 1.37456  | F           | -5.25420 | -1.23727 | 1.37344  |
| F          | -7.14961 | -0.14550 | -0.33350 | F           | -7.11163 | -0.24778 | -0.34168 |
| F          | -5.78064 | 1.50402  | 1.33084  | F           | -5.76097 | 1.40744  | 1.32870  |
| <b>TS3</b> |          |          |          | <b>INT3</b> |          |          |          |
| Ru         | -2.98530 | 0.17440  | -0.06964 | Ru          | -2.93124 | 0.36053  | -0.08944 |
| C          | -3.40366 | 2.10226  | -1.18268 | C           | -3.71716 | 1.97364  | -1.40050 |
| C          | -3.47485 | 1.00288  | -2.05839 | C           | -3.61362 | 0.76338  | -2.12372 |
| C          | -4.34713 | -0.10026 | -1.81864 | C           | -4.35511 | -0.40889 | -1.76722 |
| C          | -5.16510 | -0.13489 | -0.67450 | C           | -5.09888 | -0.44110 | -0.59135 |
| C          | -5.04314 | 0.93711  | 0.26273  | C           | -5.08363 | 0.74069  | 0.23162  |
| C          | -4.18575 | 2.02384  | 0.01000  | C           | -4.47252 | 1.93298  | -0.18975 |
| H          | -2.81744 | 0.96802  | -2.91840 | H           | -2.97483 | 0.72691  | -2.99676 |
| H          | -4.33018 | -0.93180 | -2.50732 | H           | -4.25855 | -1.28905 | -2.38666 |
| H          | -5.59165 | 0.89972  | 1.19428  | H           | -5.57664 | 0.71730  | 1.19483  |
| H          | -4.08907 | 2.79845  | 0.75972  | H           | -4.52073 | 2.80725  | 0.44576  |
| C          | -2.53011 | 3.28557  | -1.47035 | C           | -3.05482 | 3.23327  | -1.87147 |
| H          | -1.72080 | 3.02260  | -2.15095 | H           | -2.20467 | 3.01345  | -2.51712 |
| H          | -3.12328 | 4.07419  | -1.94176 | H           | -3.76743 | 3.83250  | -2.44536 |
| H          | -2.10044 | 3.69230  | -0.55573 | H           | -2.70725 | 3.83573  | -1.03258 |
| C          | -6.10182 | -1.28039 | -0.36098 | C           | -5.88561 | -1.64491 | -0.11699 |
| H          | -6.04104 | -1.43747 | 0.72001  | H           | -5.73109 | -1.70741 | 0.96578  |
| C          | -7.54269 | -0.84884 | -0.69639 | C           | -7.38689 | -1.39384 | -0.35473 |
| H          | -7.65672 | -0.67119 | -1.76835 | H           | -7.60245 | -1.32406 | -1.42357 |
| H          | -8.24010 | -1.63707 | -0.40787 | H           | -7.97410 | -2.21637 | 0.05751  |
| H          | -7.82688 | 0.06328  | -0.16866 | H           | -7.72258 | -0.46996 | 0.11943  |
| C          | -5.74558 | -2.59849 | -1.04879 | C           | -5.45076 | -2.97363 | -0.73632 |
| H          | -6.41205 | -3.38516 | -0.69159 | H           | -6.00416 | -3.79276 | -0.27468 |
| H          | -5.87016 | -2.53793 | -2.13265 | H           | -5.65726 | -3.00662 | -1.80866 |
| H          | -4.72077 | -2.89744 | -0.82816 | H           | -4.38592 | -3.16351 | -0.58950 |
| O          | -1.79877 | -0.94410 | 2.62293  | O           | -1.60302 | -2.64525 | 0.88419  |

|             |          |          |          |            |          |          |          |
|-------------|----------|----------|----------|------------|----------|----------|----------|
| C           | -2.58685 | -1.79990 | 2.13358  | C          | -2.27003 | -2.02673 | 1.83726  |
| O           | -3.19621 | -1.62578 | 1.03734  | O          | -2.76404 | -0.90567 | 1.70408  |
| C           | -2.81222 | -3.08498 | 2.88222  | C          | -2.38012 | -2.79860 | 3.11082  |
| H           | -1.86032 | -3.60941 | 2.98163  | H          | -2.74449 | -3.80561 | 2.90341  |
| H           | -3.53088 | -3.71686 | 2.36740  | H          | -3.04144 | -2.28902 | 3.80533  |
| H           | -3.16602 | -2.85734 | 3.88886  | H          | -1.38554 | -2.89597 | 3.55190  |
| C           | -0.10908 | 0.89948  | 0.36422  | Sb         | 5.36805  | -0.26047 | -0.16070 |
| C           | 0.97373  | 1.76588  | 0.47981  | F          | 4.87292  | -1.55099 | 1.14663  |
| C           | 0.87864  | 2.87235  | 1.31650  | F          | 3.65835  | 0.59224  | 0.09933  |
| C           | -0.28650 | 3.10156  | 2.04267  | F          | 5.79797  | 1.04227  | -1.47584 |
| C           | -1.36353 | 2.22889  | 1.93107  | F          | 7.04053  | -1.12210 | -0.42451 |
| C           | -1.30874 | 1.11837  | 1.08081  | F          | 6.09073  | 0.86029  | 1.19460  |
| H           | 1.88724  | 1.59395  | -0.07500 | F          | 4.55264  | -1.34131 | -1.50846 |
| H           | 1.71833  | 3.55056  | 1.40682  | C          | -0.16275 | 1.20401  | 0.48104  |
| H           | -0.35030 | 3.95618  | 2.70616  | C          | 0.92303  | 1.92657  | 0.99101  |
| H           | -2.24494 | 2.39160  | 2.54086  | C          | 0.69218  | 2.99839  | 1.83503  |
| H           | -1.75460 | 0.05758  | 1.73158  | C          | -0.61798 | 3.33394  | 2.17284  |
| C           | -0.12981 | -0.28250 | -0.51901 | C          | -1.69470 | 2.61585  | 1.66199  |
| O           | -1.25044 | -0.81256 | -0.79019 | C          | -1.49852 | 1.54045  | 0.79174  |
| N           | 0.98208  | -0.79719 | -1.01414 | H          | 1.94019  | 1.65077  | 0.74072  |
| H           | 1.88124  | -0.41085 | -0.74238 | H          | 1.52400  | 3.56465  | 2.23469  |
| C           | 0.98639  | -1.96254 | -1.88695 | H          | -0.80193 | 4.16630  | 2.84366  |
| H           | 0.33884  | -1.79724 | -2.74814 | H          | -2.69488 | 2.90607  | 1.96052  |
| H           | 2.00620  | -2.12697 | -2.22582 | H          | -1.46606 | -2.02558 | 0.11991  |
| H           | 0.63607  | -2.84932 | -1.35619 | C          | -0.02773 | 0.02719  | -0.37390 |
| Sb          | 5.43526  | -0.25547 | -0.13640 | O          | -1.10666 | -0.56712 | -0.74194 |
| F           | 3.56025  | 0.03391  | -0.45527 | N          | 1.13748  | -0.45650 | -0.76269 |
| F           | 5.83727  | 1.05833  | -1.45148 | H          | 1.99088  | -0.01180 | -0.44093 |
| F           | 5.38872  | 1.10195  | 1.19458  | C          | 1.27620  | -1.63469 | -1.61096 |
| F           | 4.96041  | -1.55788 | 1.16749  | H          | 0.67313  | -1.52640 | -2.51220 |
| F           | 7.28471  | -0.55838 | 0.18156  | H          | 2.32576  | -1.73088 | -1.87532 |
| F           | 5.41422  | -1.59788 | -1.48588 | H          | 0.95745  | -2.53677 | -1.08515 |
| <b>INT4</b> |          |          |          | <b>TS4</b> |          |          |          |
| Ru          | -1.31163 | -0.41957 | 0.27755  | Ru         | -1.97953 | -0.23423 | 0.66715  |
| C           | -0.26315 | -1.02018 | 2.32514  | C          | -3.07737 | -0.72423 | 2.69925  |
| C           | 0.26092  | 0.18319  | 1.83236  | C          | -3.28411 | 0.60838  | 2.34146  |
| C           | -0.56269 | 1.33021  | 1.64103  | C          | -3.82878 | 0.96805  | 1.06770  |
| C           | -1.93194 | 1.29733  | 1.92392  | C          | -4.22930 | -0.00358 | 0.13561  |
| C           | -2.49067 | 0.00783  | 2.17323  | C          | -3.88373 | -1.35360 | 0.44185  |
| C           | -1.68067 | -1.12577 | 2.38924  | C          | -3.29836 | -1.70041 | 1.67850  |
| H           | 1.31715  | 0.26924  | 1.62693  | H          | -3.00700 | 1.39817  | 3.02843  |

|    |          |          |          |    |          |          |          |
|----|----------|----------|----------|----|----------|----------|----------|
| H  | -0.09061 | 2.24500  | 1.31071  | H  | -3.94076 | 2.01789  | 0.83924  |
| H  | -3.56274 | -0.09405 | 2.28411  | H  | -4.08376 | -2.13169 | -0.28382 |
| H  | -2.14995 | -2.06399 | 2.65610  | H  | -3.05353 | -2.73795 | 1.86926  |
| C  | 0.64172  | -2.14720 | 2.70818  | C  | -2.58206 | -1.11654 | 4.05577  |
| H  | 1.53176  | -2.16055 | 2.08072  | H  | -2.17631 | -0.25984 | 4.59256  |
| H  | 0.95854  | -1.99286 | 3.74440  | H  | -3.41066 | -1.52323 | 4.64250  |
| H  | 0.13944  | -3.11033 | 2.65171  | H  | -1.81471 | -1.88787 | 3.99145  |
| C  | -2.79299 | 2.53472  | 2.01349  | C  | -4.98574 | 0.31513  | -1.13321 |
| H  | -3.80602 | 2.25200  | 1.72198  | H  | -4.67906 | -0.42119 | -1.87865 |
| C  | -2.83892 | 2.96897  | 3.49445  | C  | -6.49129 | 0.12084  | -0.86389 |
| H  | -1.84891 | 3.27047  | 3.84419  | H  | -6.85463 | 0.84294  | -0.12860 |
| H  | -3.51314 | 3.82010  | 3.60314  | H  | -7.05293 | 0.26623  | -1.78834 |
| H  | -3.19932 | 2.16676  | 4.14083  | H  | -6.70957 | -0.88174 | -0.49109 |
| C  | -2.34763 | 3.68769  | 1.11495  | C  | -4.70192 | 1.70208  | -1.70937 |
| H  | -3.06294 | 4.50708  | 1.19661  | H  | -5.22699 | 1.81465  | -2.65893 |
| H  | -1.36990 | 4.07815  | 1.40560  | H  | -5.05094 | 2.49900  | -1.04849 |
| H  | -2.31083 | 3.38126  | 0.06977  | H  | -3.63695 | 1.84281  | -1.89808 |
| Sb | 4.31711  | 0.17299  | 0.41488  | Sb | 4.54055  | 0.18478  | -0.48887 |
| F  | 2.93000  | -1.14242 | 0.40255  | F  | 2.69400  | -0.27094 | -0.66553 |
| F  | 3.21222  | 1.28247  | 1.51817  | F  | 4.12082  | 1.06867  | 1.17783  |
| F  | 5.67208  | 1.50982  | 0.43461  | F  | 6.37052  | 0.64199  | -0.25528 |
| F  | 5.39212  | -0.94392 | -0.69229 | F  | 4.90474  | -0.65838 | -2.15094 |
| F  | 5.06215  | -0.63145 | 1.97362  | F  | 4.81990  | -1.44485 | 0.44749  |
| F  | 3.54696  | 0.97179  | -1.13448 | F  | 4.20621  | 1.83656  | -1.37274 |
| C  | 0.36749  | -2.22275 | -1.36009 | C  | 0.76193  | -0.03167 | 1.79217  |
| C  | 0.99101  | -3.38577 | -1.82568 | C  | 1.66939  | -0.20272 | 2.83100  |
| C  | 0.63859  | -4.61510 | -1.30032 | C  | 1.78062  | -1.43709 | 3.45880  |
| C  | -0.35240 | -4.68141 | -0.32235 | C  | 0.97485  | -2.49119 | 3.04402  |
| C  | -0.97138 | -3.52725 | 0.14527  | C  | 0.06567  | -2.32698 | 2.00439  |
| C  | -0.60278 | -2.27793 | -0.34671 | C  | -0.07364 | -1.09171 | 1.36979  |
| H  | 1.75016  | -3.33981 | -2.59972 | H  | 2.27319  | 0.63006  | 3.16973  |
| H  | 1.11967  | -5.51760 | -1.65571 | H  | 2.48861  | -1.57249 | 4.26653  |
| H  | -0.65013 | -5.64377 | 0.07880  | H  | 1.05568  | -3.45747 | 3.52793  |
| H  | -1.75298 | -3.62062 | 0.88817  | H  | -0.51525 | -3.17757 | 1.67898  |
| C  | 0.59045  | -0.88787 | -1.90682 | C  | 0.53140  | 1.25695  | 1.13120  |
| O  | -0.07403 | 0.07627  | -1.38532 | O  | -0.61895 | 1.45968  | 0.61590  |
| N  | 1.39221  | -0.66666 | -2.93197 | N  | 1.49245  | 2.15812  | 1.06339  |
| H  | 1.91891  | -1.44995 | -3.29867 | H  | 2.42525  | 1.85364  | 1.32471  |
| C  | 1.60801  | 0.63980  | -3.54403 | C  | 1.36398  | 3.44572  | 0.39270  |
| H  | 2.15024  | 0.48906  | -4.47429 | H  | 2.35954  | 3.86787  | 0.28532  |
| H  | 0.65210  | 1.11339  | -3.76454 | H  | 0.91829  | 3.32560  | -0.59446 |

|             |          |          |          |             |          |          |          |
|-------------|----------|----------|----------|-------------|----------|----------|----------|
| H           | 2.19759  | 1.27389  | -2.88329 | H           | 0.74875  | 4.12850  | 0.98069  |
| C           | -2.80986 | -1.11588 | -1.19889 | C           | -0.20042 | -1.23615 | -0.55396 |
| C           | -2.85060 | 0.28817  | -1.15960 | C           | -1.16760 | -0.44879 | -1.29537 |
| H           | -2.34413 | -1.70583 | -1.97154 | H           | 0.84139  | -0.93914 | -0.61135 |
| H           | -2.36582 | 0.95516  | -1.85839 | H           | -0.89605 | 0.51512  | -1.70578 |
| C           | -4.08252 | -1.62484 | -0.60093 | C           | -0.44195 | -2.68444 | -0.97272 |
| O           | -4.44121 | -2.77361 | -0.44981 | O           | 0.15458  | -3.67477 | -0.61445 |
| C           | -4.18878 | 0.67329  | -0.60700 | C           | -1.89688 | -1.37421 | -2.19486 |
| O           | -4.66809 | 1.78402  | -0.50850 | O           | -2.71115 | -1.11475 | -3.05723 |
| N           | -4.84284 | -0.50520 | -0.26034 | N           | -1.45499 | -2.67299 | -1.91131 |
| C           | -6.17943 | -0.56688 | 0.32719  | C           | -1.96557 | -3.87445 | -2.56890 |
| H           | -6.29513 | 0.31719  | 0.95442  | H           | -3.00612 | -3.67576 | -2.82417 |
| H           | -6.20429 | -1.44839 | 0.96796  | H           | -1.93572 | -4.67904 | -1.83415 |
| C           | -7.28450 | -0.63054 | -0.72216 | C           | -1.16750 | -4.24997 | -3.81307 |
| H           | -7.18024 | -1.51919 | -1.34612 | H           | -0.12519 | -4.45071 | -3.56278 |
| H           | -8.25741 | -0.67249 | -0.22904 | H           | -1.59019 | -5.15069 | -4.26191 |
| H           | -7.26524 | 0.25134  | -1.36386 | H           | -1.20228 | -3.45061 | -4.55426 |
| H           | 0.22252  | 1.90736  | -1.44393 | H           | -1.49788 | 3.00613  | 0.10828  |
| O           | 0.42133  | 2.86810  | -1.35861 | O           | -2.08782 | 3.79414  | 0.07469  |
| O           | -1.22533 | 3.04158  | -2.87164 | O           | -1.21069 | 4.01618  | -1.97948 |
| C           | -0.37513 | 3.56566  | -2.18316 | C           | -1.95652 | 4.41289  | -1.11212 |
| C           | -0.07733 | 5.03687  | -2.15356 | C           | -2.82936 | 5.63130  | -1.21491 |
| H           | 0.91788  | 5.21082  | -2.56897 | H           | -2.55487 | 6.34708  | -0.43764 |
| H           | -0.81597 | 5.57790  | -2.73839 | H           | -2.71529 | 6.08752  | -2.19423 |
| H           | -0.06667 | 5.40110  | -1.12557 | H           | -3.87281 | 5.35760  | -1.04966 |
| <b>INT5</b> |          |          |          | <b>INT6</b> |          |          |          |
| Ru          | 2.39368  | -0.73482 | 0.25201  | Ru          | 2.58572  | -1.05033 | 0.44404  |
| C           | 2.91648  | -1.62573 | 2.30512  | C           | 3.67773  | -2.41334 | 1.96447  |
| C           | 2.86716  | -2.69478 | 1.38769  | C           | 2.74833  | -3.20022 | 1.27390  |
| C           | 3.56538  | -2.60041 | 0.16623  | C           | 2.71453  | -3.17214 | -0.14654 |
| C           | 4.41639  | -1.49827 | -0.14413 | C           | 3.65744  | -2.45532 | -0.92256 |
| C           | 4.50202  | -0.45862 | 0.82512  | C           | 4.59347  | -1.65655 | -0.20226 |
| C           | 3.74418  | -0.50145 | 2.00905  | C           | 4.58849  | -1.60947 | 1.20540  |
| H           | 2.22412  | -3.54398 | 1.57634  | H           | 2.00044  | -3.76237 | 1.81651  |
| H           | 3.41230  | -3.37439 | -0.57331 | H           | 1.91056  | -3.69431 | -0.64547 |
| H           | 5.08335  | 0.42370  | 0.59675  | H           | 5.28813  | -1.02658 | -0.74357 |
| H           | 3.76787  | 0.33811  | 2.69138  | H           | 5.28477  | -0.95989 | 1.71809  |
| C           | 2.14575  | -1.67687 | 3.58833  | C           | 3.70114  | -2.37224 | 3.46234  |
| H           | 1.24701  | -2.28446 | 3.49470  | H           | 2.72499  | -2.61136 | 3.88304  |
| H           | 2.77745  | -2.12729 | 4.36033  | H           | 4.41887  | -3.11012 | 3.83291  |
| H           | 1.86777  | -0.68074 | 3.92883  | H           | 4.02121  | -1.39796 | 3.83235  |

|   |          |          |          |   |          |          |          |
|---|----------|----------|----------|---|----------|----------|----------|
| C | 5.24359  | -1.41841 | -1.41021 | C | 3.72477  | -2.53352 | -2.43404 |
| H | 5.32538  | -0.35541 | -1.65302 | H | 4.05307  | -1.54976 | -2.78696 |
| C | 6.66030  | -1.95079 | -1.12903 | C | 4.80305  | -3.55276 | -2.84359 |
| H | 6.63529  | -3.01205 | -0.86867 | H | 4.53221  | -4.55777 | -2.51046 |
| H | 7.28479  | -1.83629 | -2.01700 | H | 4.90860  | -3.57336 | -3.92991 |
| H | 7.13840  | -1.41176 | -0.30894 | H | 5.77553  | -3.30504 | -2.41400 |
| C | 4.61940  | -2.13078 | -2.61241 | C | 2.38736  | -2.85112 | -3.10671 |
| H | 5.21091  | -1.92374 | -3.50564 | H | 2.49387  | -2.77215 | -4.18970 |
| H | 4.60442  | -3.21555 | -2.48115 | H | 2.05834  | -3.86986 | -2.88855 |
| H | 3.59820  | -1.79448 | -2.79706 | H | 1.60113  | -2.16392 | -2.79064 |
| C | -0.25926 | -0.50949 | 0.28013  | C | -0.45938 | 0.96644  | 0.29747  |
| C | -1.00276 | -1.20699 | 1.24285  | C | -1.39167 | 1.35453  | 1.26106  |
| C | -1.20261 | -0.66435 | 2.49635  | C | -1.39465 | 2.64584  | 1.76759  |
| C | -0.65224 | 0.57905  | 2.80563  | C | -0.46620 | 3.55944  | 1.29183  |
| C | 0.06753  | 1.28305  | 1.85842  | C | 0.44695  | 3.18183  | 0.31283  |
| C | 0.27581  | 0.77186  | 0.56513  | C | 0.47940  | 1.88513  | -0.20159 |
| H | -1.42263 | -2.17278 | 0.99001  | H | -2.10834 | 0.63167  | 1.63028  |
| H | -1.79027 | -1.20100 | 3.23083  | H | -2.11804 | 2.93236  | 2.52081  |
| H | -0.80941 | 1.01183  | 3.78627  | H | -0.45588 | 4.57590  | 1.66682  |
| H | 0.43573  | 2.26819  | 2.10812  | H | 1.12995  | 3.93346  | -0.06007 |
| C | -0.04138 | -1.13734 | -1.05766 | C | -0.47958 | -0.44761 | -0.16290 |
| O | 1.15211  | -1.33145 | -1.41788 | O | 0.54789  | -1.16646 | -0.23640 |
| N | -1.07355 | -1.50290 | -1.78755 | N | -1.66017 | -0.96084 | -0.48557 |
| H | -2.00794 | -1.25346 | -1.46126 | H | -2.48467 | -0.36920 | -0.46839 |
| C | -0.93167 | -2.16681 | -3.07801 | C | -1.84605 | -2.35290 | -0.86600 |
| H | -0.19991 | -2.97010 | -3.00697 | H | -1.41104 | -3.01555 | -0.11750 |
| H | -1.89815 | -2.57838 | -3.35832 | H | -2.91494 | -2.54000 | -0.93849 |
| H | -0.60523 | -1.46266 | -3.84528 | H | -1.37679 | -2.56367 | -1.82850 |
| C | 0.91148  | 1.61532  | -0.54808 | C | 1.46078  | 1.48740  | -1.30347 |
| C | 2.29477  | 1.06900  | -0.89866 | C | 2.69337  | 0.66603  | -0.83470 |
| H | 0.22816  | 1.64516  | -1.40219 | H | 0.91626  | 0.97111  | -2.09510 |
| H | 2.40392  | 0.71559  | -1.92234 | H | 3.09001  | 0.20995  | -1.75124 |
| C | 1.16516  | 3.06210  | -0.12569 | C | 2.12128  | 2.73265  | -1.90165 |
| O | 0.33568  | 3.88803  | 0.19447  | O | 1.65507  | 3.51838  | -2.69424 |
| C | 3.24403  | 2.18010  | -0.64424 | C | 3.70597  | 1.73827  | -0.56598 |
| O | 4.44734  | 2.21730  | -0.83126 | O | 4.69260  | 1.69413  | 0.16159  |
| N | 2.52365  | 3.28301  | -0.16182 | N | 3.38199  | 2.85295  | -1.32467 |
| C | 3.13945  | 4.56468  | 0.17629  | C | 4.25531  | 4.01367  | -1.50272 |
| H | 4.13757  | 4.34259  | 0.55201  | H | 4.77009  | 4.17128  | -0.55528 |
| H | 2.54987  | 4.99751  | 0.98436  | H | 3.60809  | 4.86913  | -1.69357 |
| C | 3.20986  | 5.51938  | -1.01132 | C | 5.25497  | 3.82779  | -2.63927 |

|            |          |          |          |             |          |          |          |
|------------|----------|----------|----------|-------------|----------|----------|----------|
| H          | 2.21261  | 5.74474  | -1.39139 | H           | 4.74290  | 3.67821  | -3.59074 |
| H          | 3.67538  | 6.45685  | -0.70162 | H           | 5.88169  | 4.71707  | -2.72592 |
| H          | 3.80599  | 5.09390  | -1.81959 | H           | 5.90538  | 2.97175  | -2.45315 |
| Sb         | -5.14686 | -0.03846 | -0.17125 | O           | 1.92079  | 0.20198  | 2.07719  |
| F          | -3.54982 | -0.78632 | -0.93922 | C           | 2.47773  | 0.99153  | 2.84176  |
| F          | -6.18702 | -1.17059 | -1.29125 | O           | 3.68260  | 1.48478  | 2.65672  |
| F          | -5.10592 | -1.40229 | 1.15595  | C           | 1.81548  | 1.46836  | 4.09427  |
| F          | -4.05514 | 1.06663  | 0.92602  | H           | 0.84840  | 0.99007  | 4.21551  |
| F          | -6.71895 | 0.71086  | 0.59746  | H           | 2.45670  | 1.25062  | 4.95050  |
| F          | -5.13312 | 1.29074  | -1.53112 | H           | 1.69274  | 2.55174  | 4.04693  |
|            |          |          |          | H           | 4.06049  | 1.28899  | 1.75676  |
|            |          |          |          | Sb          | -6.05760 | -0.16317 | -0.17204 |
|            |          |          |          | F           | -4.18324 | 0.16152  | -0.43717 |
|            |          |          |          | F           | -6.31651 | 1.69245  | 0.14530  |
|            |          |          |          | F           | -6.34541 | 0.11331  | -2.03031 |
|            |          |          |          | F           | -5.73423 | -2.01395 | -0.49581 |
|            |          |          |          | F           | -7.90847 | -0.50588 | 0.09939  |
|            |          |          |          | F           | -5.71253 | -0.43427 | 1.68107  |
| <b>TS5</b> |          |          |          | <b>INT7</b> |          |          |          |
| Ru         | 2.41804  | -1.20481 | 0.49231  | Ru          | 2.64945  | -1.71630 | -0.14784 |
| C          | 3.30147  | -2.78854 | 1.81981  | C           | 3.81268  | -3.58185 | -0.41880 |
| C          | 2.42981  | -3.38265 | 0.87404  | C           | 3.11243  | -3.23463 | -1.61112 |
| C          | 2.61743  | -3.16200 | -0.51403 | C           | 3.31257  | -1.99260 | -2.26532 |
| C          | 3.65983  | -2.34652 | -1.01347 | C           | 4.13530  | -1.00654 | -1.69693 |
| C          | 4.49132  | -1.71338 | -0.04500 | C           | 4.75849  | -1.31827 | -0.44870 |
| C          | 4.32657  | -1.92852 | 1.34150  | C           | 4.64445  | -2.59466 | 0.15404  |
| H          | 1.58771  | -3.97067 | 1.21208  | H           | 2.38609  | -3.92866 | -2.01663 |
| H          | 1.87962  | -3.56173 | -1.19579 | H           | 2.71867  | -1.77198 | -3.14074 |
| H          | 5.22728  | -0.98879 | -0.36979 | H           | 5.31684  | -0.54632 | 0.06798  |
| H          | 4.95283  | -1.39323 | 2.04181  | H           | 5.09114  | -2.76999 | 1.12015  |
| C          | 3.09465  | -3.00267 | 3.28533  | C           | 3.60957  | -4.91214 | 0.23647  |
| H          | 2.03835  | -3.12259 | 3.52177  | H           | 2.63292  | -5.32930 | -0.00938 |
| H          | 3.61519  | -3.91765 | 3.58395  | H           | 4.37134  | -5.60886 | -0.12593 |
| H          | 3.50136  | -2.18008 | 3.87172  | H           | 3.70486  | -4.82911 | 1.31720  |
| C          | 3.92234  | -2.13501 | -2.49102 | C           | 4.34530  | 0.36005  | -2.31304 |
| H          | 4.30550  | -1.11458 | -2.59770 | H           | 4.43341  | 1.06643  | -1.48097 |
| C          | 5.03526  | -3.09615 | -2.94737 | C           | 5.68986  | 0.36444  | -3.06540 |
| H          | 4.71341  | -4.13595 | -2.85041 | H           | 5.66681  | -0.33301 | -3.90588 |
| H          | 5.27977  | -2.91346 | -3.99519 | H           | 5.89054  | 1.36264  | -3.45796 |
| H          | 5.94575  | -2.96635 | -2.35962 | H           | 6.51939  | 0.08468  | -2.41359 |
| C          | 2.68155  | -2.27033 | -3.37685 | C           | 3.20362  | 0.82636  | -3.21823 |

|   |          |          |          |   |          |          |          |
|---|----------|----------|----------|---|----------|----------|----------|
| H | 2.93425  | -1.99544 | -4.40178 | H | 3.37983  | 1.85816  | -3.52524 |
| H | 2.31120  | -3.29789 | -3.40062 | H | 3.14028  | 0.22610  | -4.12885 |
| H | 1.86962  | -1.62244 | -3.04254 | H | 2.23930  | 0.78122  | -2.70974 |
| C | -0.59415 | 0.95246  | 0.41091  | C | -0.31496 | 0.51163  | 1.26409  |
| C | -1.65335 | 1.07794  | 1.31357  | C | -1.21784 | -0.03318 | 2.18541  |
| C | -1.79766 | 2.22144  | 2.08374  | C | -1.45628 | 0.58287  | 3.40217  |
| C | -0.88012 | 3.25327  | 1.94337  | C | -0.80054 | 1.76924  | 3.70757  |
| C | 0.16567  | 3.13974  | 1.03510  | C | 0.08548  | 2.32068  | 2.79434  |
| C | 0.33325  | 1.99803  | 0.25304  | C | 0.35255  | 1.70980  | 1.56762  |
| H | -2.35835 | 0.26476  | 1.42698  | H | -1.71722 | -0.96495 | 1.95543  |
| H | -2.62167 | 2.30305  | 2.78136  | H | -2.15122 | 0.14044  | 4.10510  |
| H | -0.97822 | 4.15642  | 2.53396  | H | -0.98306 | 2.26936  | 4.65107  |
| H | 0.85206  | 3.96875  | 0.92955  | H | 0.57215  | 3.25889  | 3.03884  |
| C | -0.50712 | -0.31098 | -0.37487 | C | -0.11219 | -0.22441 | -0.01705 |
| O | 0.54043  | -1.00359 | -0.50576 | O | 1.02963  | -0.40412 | -0.54641 |
| N | -1.62021 | -0.72391 | -0.96098 | N | -1.19163 | -0.66884 | -0.63080 |
| H | -2.45214 | -0.14273 | -0.91201 | H | -2.10668 | -0.47072 | -0.23107 |
| C | -1.72153 | -1.98729 | -1.67634 | C | -1.15921 | -1.41631 | -1.88114 |
| H | -1.33169 | -2.80029 | -1.06449 | H | -0.80459 | -2.43635 | -1.71730 |
| H | -2.77144 | -2.16889 | -1.88957 | H | -2.17137 | -1.44292 | -2.27733 |
| H | -1.16115 | -1.95439 | -2.61211 | H | -0.49561 | -0.92681 | -2.59249 |
| C | 1.46141  | 1.89038  | -0.76340 | C | 1.29836  | 2.40294  | 0.60859  |
| C | 2.67624  | 1.01434  | -0.37538 | C | 2.71184  | 2.69173  | 1.14745  |
| H | 1.02977  | 1.51901  | -1.69802 | H | 1.37249  | 1.82376  | -0.31054 |
| H | 2.82598  | 0.26686  | -1.15744 | H | 3.48321  | 2.05840  | 0.70992  |
| C | 2.09172  | 3.24083  | -1.11855 | C | 0.78558  | 3.78111  | 0.17326  |
| O | 1.52097  | 4.22433  | -1.53727 | O | -0.32131 | 4.05015  | -0.23194 |
| C | 3.87909  | 1.89981  | -0.50240 | C | 2.98646  | 4.14191  | 0.80509  |
| O | 5.04348  | 1.60543  | -0.31645 | O | 4.02276  | 4.74859  | 0.96481  |
| N | 3.45518  | 3.16435  | -0.90386 | N | 1.82634  | 4.69297  | 0.28147  |
| C | 4.37315  | 4.27576  | -1.15617 | C | 1.70901  | 6.09555  | -0.12115 |
| H | 5.19695  | 4.16710  | -0.45176 | H | 2.35612  | 6.66880  | 0.54180  |
| H | 3.83111  | 5.19119  | -0.92111 | H | 0.67536  | 6.38828  | 0.05965  |
| C | 4.88715  | 4.30405  | -2.59171 | C | 2.08978  | 6.32096  | -1.58040 |
| H | 4.06466  | 4.41143  | -3.30004 | H | 1.44213  | 5.74956  | -2.24682 |
| H | 5.56144  | 5.15223  | -2.72300 | H | 1.98270  | 7.37855  | -1.82767 |
| H | 5.43806  | 3.39275  | -2.82826 | H | 3.12551  | 6.03213  | -1.76393 |
| O | 1.46558  | -0.49454 | 2.26481  | O | 1.74455  | -1.92876 | 1.62038  |
| C | 1.90049  | 0.55332  | 2.81829  | C | 2.18674  | -2.51990 | 2.71706  |
| O | 2.71784  | 1.33615  | 2.23876  | O | 3.33341  | -2.89944 | 2.88700  |
| C | 1.45630  | 0.88664  | 4.21083  | C | 1.11959  | -2.66197 | 3.77745  |



|            |          |          |          |             |          |          |          |
|------------|----------|----------|----------|-------------|----------|----------|----------|
| H          | 0.67017  | 0.21259  | 4.53982  | H           | 0.73447  | -1.67692 | 4.04501  |
| H          | 2.31518  | 0.80181  | 4.88075  | H           | 0.28004  | -3.23911 | 3.38595  |
| H          | 1.11184  | 1.91967  | 4.24734  | H           | 1.52727  | -3.15210 | 4.65809  |
| H          | 2.74686  | 0.98300  | 1.04912  | H           | 2.77931  | 2.57713  | 2.23077  |
| Sb         | -5.64822 | -0.18636 | -0.31264 | Sb          | -5.46462 | -0.39548 | -0.53728 |
| F          | -4.08867 | 0.64921  | -1.08455 | F           | -3.77677 | -0.47046 | 0.39263  |
| F          | -6.70834 | 1.27646  | -0.90263 | F           | -6.32612 | -0.04263 | 1.11933  |
| F          | -5.94341 | -1.08055 | -1.96614 | F           | -5.19511 | 1.46369  | -0.81721 |
| F          | -4.50815 | -1.61423 | 0.24546  | F           | -4.52096 | -0.76745 | -2.15699 |
| F          | -7.16313 | -1.04035 | 0.45481  | F           | -7.11846 | -0.32099 | -1.47037 |
| F          | -5.29957 | 0.71206  | 1.32830  | F           | -5.67588 | -2.26303 | -0.24787 |
| <b>TS6</b> |          |          |          | <b>HOAc</b> |          |          |          |
| Ru         | 0.87037  | 1.67800  | 0.65894  | O           | -0.23227 | 1.33856  | 0.00000  |
| C          | 2.57466  | 3.09626  | 0.57159  | C           | 0.00000  | 0.15127  | 0.00000  |
| C          | 2.33954  | 2.56841  | -0.71372 | O           | 1.25219  | -0.34437 | 0.00000  |
| C          | 1.05770  | 2.65682  | -1.33295 | H           | 1.87998  | 0.41031  | 0.00000  |
| C          | -0.03364 | 3.25823  | -0.68598 | C           | -1.03385 | -0.93775 | 0.00000  |
| C          | 0.17598  | 3.69941  | 0.65937  | H           | -0.90349 | -1.57108 | 0.87925  |
| C          | 1.45460  | 3.64425  | 1.26652  | H           | -2.02924 | -0.50286 | 0.00000  |
| H          | 3.12567  | 2.02445  | -1.21845 | H           | -0.90349 | -1.57108 | -0.87925 |
| H          | 0.91810  | 2.16265  | -2.28231 |             |          |          |          |
| H          | -0.66487 | 4.05202  | 1.24224  |             |          |          |          |
| H          | 1.56522  | 3.94961  | 2.29866  |             |          |          |          |
| C          | 3.91205  | 2.99077  | 1.23568  |             |          |          |          |
| H          | 4.46738  | 2.13403  | 0.85966  |             |          |          |          |
| H          | 4.48676  | 3.89889  | 1.03120  |             |          |          |          |
| H          | 3.80529  | 2.89946  | 2.31668  |             |          |          |          |
| C          | -1.40925 | 3.41506  | -1.30012 |             |          |          |          |
| H          | -2.12826 | 3.08320  | -0.54335 |             |          |          |          |
| C          | -1.66448 | 4.91252  | -1.56117 |             |          |          |          |
| H          | -0.96484 | 5.30101  | -2.30509 |             |          |          |          |
| H          | -2.67701 | 5.05231  | -1.94340 |             |          |          |          |
| H          | -1.56214 | 5.51036  | -0.65391 |             |          |          |          |
| C          | -1.63202 | 2.59675  | -2.57126 |             |          |          |          |
| H          | -2.66834 | 2.70342  | -2.89591 |             |          |          |          |
| H          | -0.99796 | 2.95118  | -3.38828 |             |          |          |          |
| H          | -1.42784 | 1.54009  | -2.40361 |             |          |          |          |
| Sb         | 3.46323  | -1.37259 | -0.46121 |             |          |          |          |
| F          | 4.60048  | 0.04815  | 0.10730  |             |          |          |          |
| F          | 3.14771  | -0.44072 | -2.09577 |             |          |          |          |
| F          | 2.30254  | -2.77151 | -1.01134 |             |          |          |          |

|   |          |          |          |
|---|----------|----------|----------|
| F | 3.73467  | -2.25293 | 1.19994  |
| F | 4.95345  | -2.26434 | -1.23746 |
| F | 1.95261  | -0.44866 | 0.31732  |
| C | -1.30002 | -2.21136 | 0.01797  |
| C | -0.54768 | -3.31264 | 0.43611  |
| C | -0.99629 | -4.12951 | 1.46491  |
| C | -2.21656 | -3.85908 | 2.07149  |
| C | -2.96852 | -2.76767 | 1.65543  |
| C | -2.52310 | -1.91993 | 0.64002  |
| H | 0.40201  | -3.50908 | -0.04414 |
| H | -0.39744 | -4.97263 | 1.78785  |
| H | -2.58647 | -4.49596 | 2.86634  |
| H | -3.92467 | -2.58027 | 2.13190  |
| C | -0.74817 | -1.36205 | -1.09549 |
| O | -0.52446 | -0.15184 | -0.96930 |
| N | -0.50932 | -2.01246 | -2.24422 |
| H | -0.74582 | -2.99381 | -2.30233 |
| C | 0.12158  | -1.37180 | -3.38809 |
| H | 0.37650  | -2.14053 | -4.11485 |
| H | -0.55180 | -0.65241 | -3.85834 |
| H | 1.03022  | -0.85754 | -3.07756 |
| C | -3.38612 | -0.75649 | 0.19420  |
| C | -4.00667 | 0.11974  | 1.29510  |
| H | -2.79598 | -0.12364 | -0.46840 |
| H | -3.53669 | 1.09867  | 1.37284  |
| C | -4.59092 | -1.20878 | -0.63548 |
| O | -4.58925 | -1.99138 | -1.56058 |
| C | -5.46481 | 0.26702  | 0.92064  |
| O | -6.30175 | 0.95136  | 1.47017  |
| N | -5.71844 | -0.54456 | -0.17688 |
| C | -7.04041 | -0.68730 | -0.78749 |
| H | -7.77089 | -0.55162 | 0.00919  |
| H | -7.11048 | -1.71097 | -1.15386 |
| C | -7.27680 | 0.31024  | -1.91651 |
| H | -6.55017 | 0.17395  | -2.71866 |
| H | -8.27470 | 0.16293  | -2.33338 |
| H | -7.20810 | 1.33646  | -1.55297 |
| O | 1.23378  | 0.78210  | 2.57923  |
| C | 0.01013  | 0.45905  | 2.70727  |
| O | -0.78480 | 0.86823  | 1.80801  |
| C | -0.46156 | -0.37257 | 3.85340  |

|                |          |          |          |                          |          |                   |
|----------------|----------|----------|----------|--------------------------|----------|-------------------|
| H              | 0.33719  | -0.51304 | 4.57786  |                          |          |                   |
| H              | -1.31819 | 0.10746  | 4.32796  |                          |          |                   |
| H              | -0.79130 | -1.34345 | 3.47924  |                          |          |                   |
| H              | -3.95372 | -0.33776 | 2.28408  |                          |          |                   |
| <b>Pre-CAT</b> |          |          |          | <b>AgSbF<sub>6</sub></b> |          |                   |
| Ru             | -1.86711 | -0.34097 | 0.46992  | Ag                       | 2.36018  | 0.00000 0.00002   |
| C              | -2.54429 | -2.45476 | 0.33452  | Sb                       | -1.09922 | -0.00000 -0.00000 |
| C              | -3.51670 | -1.68378 | 1.01027  | F                        | 0.35767  | 1.28659 -0.22029  |
| C              | -4.05017 | -0.50268 | 0.41955  | F                        | 0.35773  | -1.28667 0.21932  |
| C              | -3.62391 | -0.05648 | -0.84950 | F                        | -2.38554 | -1.35735 0.23912  |
| C              | -2.63085 | -0.84432 | -1.51951 | F                        | -2.38562 | 1.35745 -0.23810  |
| C              | -2.10893 | -2.01762 | -0.95384 | F                        | -1.01973 | 0.32618 1.86000   |
| H              | -3.80579 | -1.94796 | 2.01787  | F                        | -1.02100 | -0.32617 -1.86013 |
| H              | -4.71613 | 0.10825  | 1.01012  |                          |          |                   |
| H              | -2.19759 | -0.47458 | -2.43942 |                          |          |                   |
| H              | -1.29167 | -2.52383 | -1.44704 |                          |          |                   |
| C              | -1.94784 | -3.67509 | 0.96503  |                          |          |                   |
| H              | -2.01807 | -3.63378 | 2.05151  |                          |          |                   |
| H              | -2.49180 | -4.56031 | 0.62194  |                          |          |                   |
| H              | -0.90166 | -3.78824 | 0.68460  |                          |          |                   |
| C              | -4.14071 | 1.20368  | -1.51143 |                          |          |                   |
| H              | -3.29210 | 1.63592  | -2.05056 |                          |          |                   |
| C              | -5.21581 | 0.82993  | -2.54788 |                          |          |                   |
| H              | -6.09154 | 0.39425  | -2.06026 |                          |          |                   |
| H              | -5.53951 | 1.72090  | -3.08939 |                          |          |                   |
| H              | -4.84163 | 0.10959  | -3.27799 |                          |          |                   |
| C              | -4.65896 | 2.26030  | -0.53449 |                          |          |                   |
| H              | -4.90140 | 3.17374  | -1.08029 |                          |          |                   |
| H              | -5.57181 | 1.93313  | -0.03047 |                          |          |                   |
| H              | -3.91439 | 2.50210  | 0.22504  |                          |          |                   |
| Cl             | -1.99897 | 1.06059  | 2.47798  |                          |          |                   |
| Cl             | -0.46025 | 1.47017  | -0.55701 |                          |          |                   |
| Ru             | 1.79318  | 0.42142  | -0.17795 |                          |          |                   |
| C              | 2.59659  | 2.38350  | 0.54632  |                          |          |                   |
| C              | 2.85429  | 1.38920  | 1.50894  |                          |          |                   |
| C              | 3.51192  | 0.17790  | 1.14817  |                          |          |                   |
| C              | 3.95837  | -0.06592 | -0.16990 |                          |          |                   |
| C              | 3.68472  | 0.94774  | -1.14165 |                          |          |                   |
| C              | 3.01479  | 2.13613  | -0.80073 |                          |          |                   |
| H              | 2.47226  | 1.50516  | 2.51401  |                          |          |                   |
| H              | 3.59928  | -0.59785 | 1.89534  |                          |          |                   |

|                           |          |          |          |                                          |                           |
|---------------------------|----------|----------|----------|------------------------------------------|---------------------------|
| H                         | 3.91186  | 0.75388  | -2.18129 |                                          |                           |
| H                         | 2.75678  | 2.84252  | -1.57828 |                                          |                           |
| C                         | 1.86646  | 3.64093  | 0.90228  |                                          |                           |
| H                         | 1.26322  | 3.99546  | 0.06776  |                                          |                           |
| H                         | 1.21428  | 3.48843  | 1.76098  |                                          |                           |
| H                         | 2.59175  | 4.42069  | 1.15373  |                                          |                           |
| C                         | 4.67112  | -1.33226 | -0.59111 |                                          |                           |
| H                         | 4.34905  | -1.53214 | -1.61680 |                                          |                           |
| C                         | 4.31916  | -2.56047 | 0.24970  |                                          |                           |
| H                         | 4.67912  | -2.47015 | 1.27759  |                                          |                           |
| H                         | 3.24217  | -2.73048 | 0.27114  |                                          |                           |
| H                         | 4.79348  | -3.44408 | -0.18080 |                                          |                           |
| C                         | 6.18962  | -1.08265 | -0.60429 |                                          |                           |
| H                         | 6.71046  | -1.96326 | -0.98514 |                                          |                           |
| H                         | 6.45471  | -0.23440 | -1.23859 |                                          |                           |
| H                         | 6.56105  | -0.88026 | 0.40362  |                                          |                           |
| Cl                        | 0.40025  | -1.06837 | 1.27863  |                                          |                           |
| Cl                        | 1.28576  | -1.08016 | -2.06480 |                                          |                           |
| <b>(AgCl)<sub>4</sub></b> |          |          |          | <b>CAT-(SbF<sub>6</sub>)<sub>2</sub></b> |                           |
| Ag                        | 1.14332  | 1.14332  | 1.14332  | Ru                                       | -0.35645 0.92321 0.41953  |
| Cl                        | -1.48998 | 1.48998  | 1.48998  | C                                        | 0.17454 1.91776 2.31072   |
| Cl                        | 1.48998  | -1.48998 | 1.48998  | C                                        | 1.12538 2.24601 1.31896   |
| Cl                        | 1.48998  | 1.48998  | -1.48998 | C                                        | 0.73275 2.76871 0.05642   |
| Ag                        | -1.14332 | -1.14332 | 1.14332  | C                                        | -0.63028 2.99454 -0.25011 |
| Ag                        | -1.14332 | 1.14332  | -1.14332 | C                                        | -1.59340 2.67849 0.75865  |
| Ag                        | 1.14332  | -1.14332 | -1.14332 | C                                        | -1.20250 2.15035 2.00203  |
| Cl                        | -1.48998 | -1.48998 | -1.48998 | H                                        | 2.16317 1.98425 1.47152   |
|                           |          |          |          | H                                        | 1.49374 2.89209 -0.70183  |
|                           |          |          |          | H                                        | -2.64845 2.73739 0.52310  |
|                           |          |          |          | H                                        | -1.96656 1.81038 2.69027  |
|                           |          |          |          | C                                        | 0.58535 1.26604 3.59293   |
|                           |          |          |          | H                                        | 0.80069 2.04179 4.33384   |
|                           |          |          |          | H                                        | -0.21104 0.63571 3.98746  |
|                           |          |          |          | H                                        | 1.48228 0.66481 3.45143   |
|                           |          |          |          | C                                        | -1.07980 3.45052 -1.62012 |
|                           |          |          |          | H                                        | -2.16511 3.32217 -1.65085 |
|                           |          |          |          | C                                        | -0.76995 4.94954 -1.77961 |
|                           |          |          |          | H                                        | 0.30722 5.13123 -1.78077  |
|                           |          |          |          | H                                        | -1.17347 5.30516 -2.72868 |
|                           |          |          |          | H                                        | -1.21623 5.54193 -0.97878 |
|                           |          |          |          | C                                        | -0.47799 2.61565 -2.75764 |

|                                            |    |          |          |          |
|--------------------------------------------|----|----------|----------|----------|
|                                            | H  | -0.87645 | 2.96324  | -3.71152 |
|                                            | H  | 0.60889  | 2.70673  | -2.80328 |
|                                            | H  | -0.73291 | 1.56134  | -2.64625 |
|                                            | Sb | -2.56253 | -1.46606 | -0.14595 |
|                                            | F  | -1.62565 | -0.00447 | -1.12171 |
|                                            | F  | -1.18917 | -0.95711 | 1.19677  |
|                                            | F  | -3.27076 | -2.75645 | 1.01393  |
|                                            | F  | -3.77541 | -1.70355 | -1.55475 |
|                                            | F  | -3.63436 | -0.10853 | 0.61100  |
|                                            | F  | -1.33986 | -2.68386 | -0.87540 |
|                                            | Sb | 2.92715  | -0.90966 | -0.24638 |
|                                            | F  | 0.97654  | -0.48716 | -0.46306 |
|                                            | F  | 3.00108  | -1.20086 | -2.10739 |
|                                            | F  | 4.76386  | -1.24522 | 0.00825  |
|                                            | F  | 2.65731  | -0.53411 | 1.59738  |
|                                            | F  | 3.22571  | 0.94502  | -0.53253 |
|                                            | F  | 2.43716  | -2.70636 | 0.03870  |
| <b>Cu(OAc)<sub>2</sub>·H<sub>2</sub>O</b>  |    |          |          |          |
|                                            | Cu | -0.00694 | -0.05234 | -0.00008 |
|                                            | O  | -1.69154 | -0.27741 | 1.08783  |
|                                            | C  | -2.34554 | -0.34336 | -0.00043 |
|                                            | O  | -1.69152 | -0.27727 | -1.08857 |
|                                            | C  | -3.83711 | -0.46635 | 0.00013  |
|                                            | H  | -4.17540 | -0.99984 | 0.88677  |
|                                            | H  | -4.17994 | -0.96589 | -0.90416 |
|                                            | H  | -4.26800 | 0.53809  | 0.02145  |
|                                            | O  | 1.68300  | -0.27754 | 1.08865  |
|                                            | C  | 2.33530  | -0.35488 | 0.00017  |
|                                            | O  | 1.68316  | -0.27697 | -1.08839 |
|                                            | C  | 3.82474  | -0.50492 | 0.00012  |
|                                            | H  | 4.15611  | -1.02466 | 0.89732  |
|                                            | H  | 4.27536  | 0.49110  | -0.00389 |
|                                            | H  | 4.15518  | -1.03100 | -0.89377 |
|                                            | O  | -0.03755 | 2.26166  | -0.00022 |
|                                            | H  | 0.40071  | 2.65363  | 0.77323  |
|                                            | H  | 0.40848  | 2.65381  | -0.76912 |
| <b>CuOAcSbF<sub>6</sub>·H<sub>2</sub>O</b> |    |          |          |          |
|                                            | Cu | 1.63160  | 0.55096  | 0.28234  |
|                                            | O  | 3.46434  | 0.61112  | -0.47155 |
|                                            | C  | 3.62333  | -0.59171 | -0.07965 |
|                                            | O  | 2.63494  | -1.11512 | 0.53175  |
|                                            | C  | 4.87634  | -1.34983 | -0.34085 |
|                                            | H  | 4.72480  | -1.96996 | -1.22849 |
|                                            | H  | 5.09642  | -2.01014 | 0.49698  |
|                                            | H  | 5.70452  | -0.66921 | -0.52667 |
|                                            | Sb | -1.68534 | -0.21448 | -0.05165 |
|                                            | F  | -0.11327 | 0.06396  | 1.15499  |
|                                            | F  | -0.33641 | -0.27194 | -1.40047 |
|                                            | F  | -3.07931 | -0.38380 | -1.29880 |
|                                            | F  | -2.82329 | -0.04565 | 1.43473  |
|                                            | F  | -1.51703 | -2.06627 | 0.22376  |
|                                            | F  | -1.66684 | 1.69561  | -0.24608 |
|                                            | O  | 0.96800  | 2.38149  | -0.02012 |
|                                            | H  | 1.39816  | 2.87343  | -0.74477 |
|                                            | H  | 0.00094  | 2.43866  | -0.16130 |

**Table S4** Coordinates of all Stationary points for the reaction of **CAT+1a+2a**, computed at B3LYP-D3+IDSCRF/ TZP-DKH(-dft) level in DCE solvent

|           |          |          |          |            |          |          |          |
|-----------|----------|----------|----------|------------|----------|----------|----------|
| <b>1a</b> |          |          |          | <b>2a</b>  |          |          |          |
| C         | 0.24399  | 0.10885  | -0.04261 | C          | 1.94287  | 0.66477  | 0.25422  |
| C         | 0.79099  | -1.16608 | -0.20013 | C          | 1.94276  | -0.66501 | 0.25429  |
| C         | 2.16716  | -1.35003 | -0.14934 | H          | 2.75590  | 1.34947  | 0.44429  |
| C         | 3.00847  | -0.26364 | 0.06392  | H          | 2.75568  | -1.34981 | 0.44440  |
| C         | 2.46956  | 1.01039  | 0.21595  | C          | 0.55916  | 1.14068  | -0.07134 |
| C         | 1.09588  | 1.19615  | 0.15498  | O          | 0.16411  | 2.28141  | -0.16403 |
| H         | 0.15125  | -2.01902 | -0.39181 | C          | 0.55905  | -1.14072 | -0.07152 |
| H         | 2.58235  | -2.34140 | -0.28325 | O          | 0.16380  | -2.28139 | -0.16403 |
| H         | 4.08118  | -0.40846 | 0.10563  | N          | -0.21315 | 0.00003  | -0.26022 |
| H         | 3.12197  | 1.85959  | 0.37900  | C          | -1.63727 | 0.00013  | -0.56755 |
| H         | 0.66411  | 2.18250  | 0.25979  | H          | -1.83211 | -0.88315 | -1.17489 |
| C         | -1.22941 | 0.37534  | -0.10276 | H          | -1.83202 | 0.88353  | -1.17474 |
| O         | -1.67196 | 1.48426  | -0.40461 | C          | -2.50172 | 0.00007  | 0.68699  |
| N         | -2.04618 | -0.66188 | 0.18729  | H          | -2.30497 | 0.88605  | 1.29199  |
| H         | -1.65300 | -1.50630 | 0.57487  | H          | -3.55781 | 0.00014  | 0.41251  |
| C         | -3.48984 | -0.50888 | 0.18399  | H          | -2.30506 | -0.88603 | 1.29184  |
| H         | -3.82555 | 0.15196  | 0.98697  |            |          |          |          |
| H         | -3.81909 | -0.08378 | -0.76370 |            |          |          |          |
| H         | -3.94514 | -1.48860 | 0.31435  |            |          |          |          |
| <b>3a</b> |          |          |          | <b>CAT</b> |          |          |          |
| C         | 1.90326  | 0.21368  | 0.13414  | Ru         | 1.24533  | 0.53512  | 0.20866  |
| C         | 3.28469  | 0.41267  | 0.14922  | C          | 1.53316  | 0.12316  | 2.36738  |
| C         | 4.16186  | -0.62235 | -0.14343 | C          | 0.93035  | -0.99448 | 1.76391  |
| C         | 3.65561  | -1.87155 | -0.47365 | C          | 1.48501  | -1.61411 | 0.61053  |
| C         | 2.28152  | -2.07222 | -0.50236 | C          | 2.66668  | -1.12533 | 0.02148  |
| C         | 1.38552  | -1.05146 | -0.18941 | C          | 3.29351  | 0.00608  | 0.63240  |
| H         | 3.67495  | 1.38730  | 0.41517  | C          | 2.73469  | 0.61855  | 1.77299  |
| H         | 5.23075  | -0.45169 | -0.11359 | H          | -0.03731 | -1.32456 | 2.11264  |
| H         | 4.32511  | -2.68850 | -0.71318 | H          | 0.91104  | -2.39106 | 0.13010  |
| H         | 1.89000  | -3.04542 | -0.77561 | H          | 4.15510  | 0.45642  | 0.15874  |
| C         | 1.00350  | 1.35072  | 0.50831  | H          | 3.17260  | 1.53563  | 2.14402  |
| O         | 0.05611  | 1.20329  | 1.28298  | C          | 0.88485  | 0.82983  | 3.51543  |
| N         | 1.30795  | 2.54618  | -0.03378 | H          | 1.26422  | 0.43083  | 4.45973  |
| H         | 1.98765  | 2.57851  | -0.78053 | H          | 1.10265  | 1.89727  | 3.48859  |
| C         | 0.48570  | 3.71680  | 0.21525  | H          | -0.19476 | 0.68894  | 3.48800  |
| H         | 0.35381  | 3.85858  | 1.28708  | C          | 3.21330  | -1.68858 | -1.26654 |
| H         | 0.98299  | 4.58904  | -0.20383 | H          | 3.85101  | -0.91259 | -1.69881 |
| H         | -0.50216 | 3.61203  | -0.24000 | C          | 4.08727  | -2.91104 | -0.95285 |
| C         | -0.74812 | -1.69955 | 1.13374  | H          | 3.48604  | -3.71417 | -0.52080 |
| C         | -0.08674 | -1.38269 | -0.21863 | H          | 4.54698  | -3.28568 | -1.86850 |

|            |          |          |          |             |          |          |          |
|------------|----------|----------|----------|-------------|----------|----------|----------|
| H          | -0.84837 | -2.76596 | 1.33116  | H           | 4.88325  | -2.66442 | -0.24801 |
| H          | -0.20386 | -2.25327 | -0.87236 | C           | 2.11984  | -2.01784 | -2.28461 |
| C          | -2.11092 | -1.04949 | 1.05910  | H           | 2.57662  | -2.32218 | -3.22698 |
| O          | -3.01302 | -1.13479 | 1.86461  | H           | 1.48591  | -2.84026 | -1.94823 |
| C          | -1.00115 | -0.33200 | -0.83565 | H           | 1.48609  | -1.15065 | -2.47356 |
| O          | -0.78903 | 0.33108  | -1.82761 | O           | 1.48492  | 1.50140  | -1.68301 |
| N          | -2.17182 | -0.29561 | -0.10162 | C           | 1.04039  | 2.59498  | -1.20594 |
| C          | -3.30131 | 0.55900  | -0.44548 | O           | 0.84601  | 2.63182  | 0.05078  |
| H          | -2.89145 | 1.44221  | -0.93398 | C           | 0.73037  | 3.75847  | -2.08057 |
| H          | -3.76601 | 0.86082  | 0.49198  | H           | -0.31639 | 3.69069  | -2.38682 |
| C          | -4.30310 | -0.14939 | -1.34785 | H           | 1.35266  | 3.73741  | -2.97289 |
| H          | -4.70764 | -1.03496 | -0.85596 | H           | 0.86767  | 4.68963  | -1.53434 |
| H          | -5.13184 | 0.52044  | -1.58284 | Sb          | -2.47357 | -0.37910 | -0.09690 |
| H          | -3.83368 | -0.45402 | -2.28427 | F           | -0.77456 | 0.50052  | -0.56335 |
| H          | -0.20759 | -1.23877 | 1.95894  | F           | -2.72610 | -0.69471 | -1.94160 |
|            |          |          |          | F           | -4.09798 | -1.23114 | 0.36161  |
|            |          |          |          | F           | -2.06871 | -0.02273 | 1.72624  |
|            |          |          |          | F           | -1.50060 | -2.00684 | 0.04525  |
|            |          |          |          | F           | -3.29873 | 1.31305  | -0.25551 |
| <b>TS1</b> |          |          |          | <b>INT1</b> |          |          |          |
| Ru         | 0.64138  | 0.89496  | -0.07219 | Ru          | -2.58682 | -0.45893 | -0.09037 |
| C          | 0.72570  | 0.11884  | -2.15930 | C           | -3.03375 | 0.21737  | -2.13638 |
| C          | 0.04321  | 1.36535  | -2.11951 | C           | -1.63754 | 0.31472  | -1.93098 |
| C          | 0.63635  | 2.49366  | -1.50885 | C           | -0.89805 | -0.79573 | -1.45665 |
| C          | 1.92595  | 2.41857  | -0.90436 | C           | -1.51221 | -2.04231 | -1.20899 |
| C          | 2.58720  | 1.16202  | -0.94478 | C           | -2.91462 | -2.13431 | -1.44245 |
| C          | 2.01293  | 0.03900  | -1.58746 | C           | -3.66802 | -1.03598 | -1.90139 |
| H          | -0.98213 | 1.41613  | -2.45550 | H           | -1.14941 | 1.27122  | -2.03810 |
| H          | 0.04668  | 3.39241  | -1.40618 | H           | 0.13526  | -0.65117 | -1.17465 |
| H          | 3.51495  | 1.03932  | -0.40301 | H           | -3.43215 | -3.04354 | -1.16524 |
| H          | 2.51086  | -0.91506 | -1.52319 | H           | -4.74093 | -1.12234 | -1.99659 |
| C          | 0.05264  | -1.09820 | -2.70634 | C           | -3.83862 | 1.41508  | -2.52603 |
| H          | 0.43511  | -2.00121 | -2.23513 | H           | -3.93376 | 1.44982  | -3.61478 |
| H          | -1.02363 | -1.04388 | -2.56014 | H           | -4.83976 | 1.36769  | -2.09924 |
| H          | 0.24907  | -1.16135 | -3.78049 | H           | -3.35575 | 2.33294  | -2.19582 |
| C          | 2.58690  | 3.58078  | -0.20732 | C           | -0.73141 | -3.21854 | -0.66975 |
| H          | 3.14756  | 3.15577  | 0.63092  | H           | -1.45500 | -4.01833 | -0.49076 |
| C          | 3.59044  | 4.22829  | -1.17420 | C           | 0.27532  | -3.70163 | -1.72153 |
| H          | 3.07373  | 4.65140  | -2.03877 | H           | 1.04259  | -2.94420 | -1.89617 |
| H          | 4.12567  | 5.03504  | -0.67111 | H           | 0.77279  | -4.60863 | -1.37463 |
| H          | 4.32390  | 3.50584  | -1.53613 | H           | -0.21294 | -3.92251 | -2.67241 |

|            |          |          |          |             |          |          |          |
|------------|----------|----------|----------|-------------|----------|----------|----------|
| C          | 1.60882  | 4.61331  | 0.34894  | C           | -0.03886 | -2.89769 | 0.65692  |
| H          | 2.15493  | 5.35186  | 0.93693  | H           | 0.47483  | -3.78439 | 1.03147  |
| H          | 1.09628  | 5.15164  | -0.45155 | H           | 0.70209  | -2.10836 | 0.53489  |
| H          | 0.85851  | 4.14824  | 0.98732  | H           | -0.76612 | -2.57659 | 1.40223  |
| O          | -0.31646 | 2.04403  | 1.49249  | O           | -3.63504 | -1.29984 | 1.58920  |
| C          | 0.35418  | 1.45582  | 2.39628  | C           | -4.23364 | -0.20009 | 1.80411  |
| O          | 1.28675  | 0.68921  | 2.01006  | O           | -4.06030 | 0.73009  | 0.95474  |
| C          | 0.03327  | 1.64059  | 3.84120  | C           | -5.07281 | 0.00448  | 3.02021  |
| H          | -0.75877 | 0.93796  | 4.11099  | H           | -4.43948 | 0.41020  | 3.81285  |
| H          | -0.33353 | 2.64988  | 4.01996  | H           | -5.48580 | -0.94272 | 3.36119  |
| H          | 0.90707  | 1.43261  | 4.45513  | H           | -5.86696 | 0.72044  | 2.81698  |
| Sb         | -3.27037 | -0.27078 | -0.05410 | Sb          | 3.74601  | -0.12054 | -0.02192 |
| F          | -1.40093 | -0.05291 | 0.34740  | F           | 3.77871  | 1.23744  | -1.35451 |
| F          | -3.52026 | 1.59244  | 0.21303  | F           | 3.30641  | 1.21492  | 1.28575  |
| F          | -5.11532 | -0.49001 | -0.45124 | F           | 3.61314  | -1.43903 | 1.34405  |
| F          | -2.96662 | -2.11752 | -0.36071 | F           | 4.18541  | -1.44700 | -1.30994 |
| F          | -2.87291 | 0.07081  | -1.89135 | F           | 1.90112  | -0.39015 | -0.42077 |
| F          | -3.56681 | -0.60415 | 1.78875  | F           | 5.58811  | 0.14598  | 0.35622  |
| C          | 2.78645  | -2.64425 | 0.38978  | C           | -0.37492 | 2.13657  | 0.52518  |
| C          | 3.56864  | -3.46389 | -0.42563 | C           | 0.75453  | 2.50374  | -0.20473 |
| C          | 4.94555  | -3.28380 | -0.48159 | C           | 0.68347  | 3.56575  | -1.09692 |
| C          | 5.54972  | -2.29234 | 0.28335  | C           | -0.50302 | 4.27505  | -1.24524 |
| C          | 4.77268  | -1.47554 | 1.10049  | C           | -1.62619 | 3.91819  | -0.50288 |
| C          | 3.39621  | -1.64309 | 1.14741  | C           | -1.56872 | 2.84402  | 0.37171  |
| H          | 3.10428  | -4.22170 | -1.04516 | H           | 1.66766  | 1.93873  | -0.11357 |
| H          | 5.54459  | -3.91295 | -1.12830 | H           | 1.55592  | 3.83050  | -1.68061 |
| H          | 6.62317  | -2.15378 | 0.24010  | H           | -0.55470 | 5.10422  | -1.94019 |
| H          | 5.24146  | -0.70302 | 1.69810  | H           | -2.54883 | 4.47476  | -0.61230 |
| H          | 2.77709  | -1.00079 | 1.75687  | H           | -2.44302 | 2.54326  | 0.93233  |
| C          | 1.29478  | -2.74685 | 0.43738  | C           | -0.36628 | 0.97063  | 1.44277  |
| O          | 0.58914  | -1.75583 | 0.64182  | O           | -1.35366 | 0.18638  | 1.51337  |
| N          | 0.76489  | -3.96724 | 0.21997  | N           | 0.69134  | 0.79177  | 2.21285  |
| H          | 1.38295  | -4.76647 | 0.21711  | H           | 1.46441  | 1.43695  | 2.11426  |
| C          | -0.66927 | -4.20257 | 0.24884  | C           | 0.89546  | -0.35316 | 3.08677  |
| H          | -1.18957 | -3.29652 | -0.04575 | H           | 0.00202  | -0.96805 | 3.07516  |
| H          | -0.91405 | -5.00838 | -0.44225 | H           | 1.75005  | -0.93230 | 2.73684  |
| H          | -1.00658 | -4.48206 | 1.25050  | H           | 1.08617  | -0.00874 | 4.10320  |
| <b>TS2</b> |          |          |          | <b>INT2</b> |          |          |          |
| Ru         | 2.87586  | -0.13767 | 0.05353  | Ru          | 2.72533  | -0.10185 | 0.04581  |
| C          | 3.69196  | -0.99332 | -1.81347 | C           | 3.70429  | -0.96192 | -1.76892 |
| C          | 2.56766  | -0.16603 | -2.13727 | C           | 2.65505  | -0.06735 | -2.14322 |



|   |          |          |          |   |          |          |          |
|---|----------|----------|----------|---|----------|----------|----------|
| C | 2.48726  | 1.16199  | -1.70689 | C | 2.61504  | 1.26650  | -1.70395 |
| C | 3.51085  | 1.71977  | -0.88418 | C | 3.59092  | 1.74373  | -0.78893 |
| C | 4.63527  | 0.90305  | -0.57646 | C | 4.61489  | 0.84811  | -0.37254 |
| C | 4.73677  | -0.42837 | -1.05980 | C | 4.68163  | -0.47678 | -0.88092 |
| H | 1.72040  | -0.60828 | -2.64324 | H | 1.83338  | -0.44743 | -2.73521 |
| H | 1.58382  | 1.71939  | -1.90193 | H | 1.77329  | 1.88373  | -1.97727 |
| H | 5.38651  | 1.27837  | 0.10500  | H | 5.32066  | 1.16495  | 0.38238  |
| H | 5.55380  | -1.05369 | -0.72886 | H | 5.41872  | -1.16049 | -0.48512 |
| C | 3.72404  | -2.43096 | -2.22117 | C | 3.71925  | -2.37386 | -2.25820 |
| H | 2.71728  | -2.81769 | -2.36463 | H | 2.71539  | -2.69880 | -2.52735 |
| H | 4.26466  | -2.52663 | -3.16682 | H | 4.34853  | -2.44512 | -3.14940 |
| H | 4.22527  | -3.03327 | -1.46614 | H | 4.10851  | -3.03505 | -1.48773 |
| C | 3.45186  | 3.12312  | -0.33404 | C | 3.56309  | 3.13802  | -0.21422 |
| H | 3.84333  | 3.07231  | 0.68648  | H | 3.84613  | 3.04583  | 0.83848  |
| C | 4.39148  | 4.01340  | -1.16413 | C | 4.63848  | 3.97677  | -0.92564 |
| H | 4.05138  | 4.07099  | -2.20059 | H | 4.41064  | 4.07296  | -1.98954 |
| H | 4.40202  | 5.02412  | -0.75397 | H | 4.67208  | 4.97774  | -0.49351 |
| H | 5.41405  | 3.63347  | -1.16153 | H | 5.62850  | 3.52947  | -0.82788 |
| C | 2.04585  | 3.71564  | -0.28190 | C | 2.20005  | 3.82186  | -0.28936 |
| H | 2.07571  | 4.68146  | 0.22322  | H | 2.24171  | 4.77494  | 0.23872  |
| H | 1.64388  | 3.88492  | -1.28313 | H | 1.91371  | 4.03430  | -1.32166 |
| H | 1.36043  | 3.06988  | 0.26315  | H | 1.42197  | 3.21495  | 0.17024  |
| O | 3.38486  | -2.71030 | 1.10953  | O | 3.85340  | -2.96442 | 0.90865  |
| C | 3.80354  | -1.94676 | 1.99073  | C | 3.75745  | -2.20793 | 1.87215  |
| O | 3.71607  | -0.66226 | 1.89274  | O | 3.27762  | -0.99891 | 1.82916  |
| C | 4.46493  | -2.46032 | 3.24574  | C | 4.19449  | -2.62735 | 3.26128  |
| H | 4.12017  | -1.90422 | 4.11680  | H | 3.39504  | -2.44349 | 3.97964  |
| H | 5.54393  | -2.31087 | 3.16543  | H | 5.05220  | -2.02607 | 3.56907  |
| H | 4.26371  | -3.52164 | 3.36961  | H | 4.46847  | -3.67948 | 3.26793  |
| C | -0.09249 | -0.43200 | 0.15107  | C | 0.01730  | -0.33355 | 0.16106  |
| C | -0.98781 | -0.22855 | -0.89226 | C | -0.77106 | -0.19063 | -0.97845 |
| C | -1.18271 | -1.23624 | -1.82749 | C | -0.85775 | -1.23938 | -1.88026 |
| C | -0.49421 | -2.44197 | -1.72209 | C | -0.16235 | -2.42946 | -1.66039 |
| C | 0.39167  | -2.65062 | -0.67187 | C | 0.60195  | -2.58821 | -0.51607 |
| C | 0.59789  | -1.64584 | 0.26599  | C | 0.69854  | -1.54423 | 0.40781  |
| H | -1.51673 | 0.70859  | -0.99045 | H | -1.29587 | 0.73654  | -1.16412 |
| H | -1.88100 | -1.07760 | -2.63850 | H | -1.47286 | -1.12963 | -2.76331 |
| H | -0.65777 | -3.22194 | -2.45532 | H | -0.23803 | -3.23686 | -2.37789 |
| H | 0.92211  | -3.58841 | -0.57047 | H | 1.12345  | -3.51488 | -0.31752 |
| H | 1.24305  | -1.83121 | 1.11731  | H | 1.17667  | -1.70010 | 1.36453  |
| C | 0.25740  | 0.62398  | 1.13013  | C | 0.26416  | 0.77887  | 1.11662  |

|            |          |          |          |             |          |          |          |
|------------|----------|----------|----------|-------------|----------|----------|----------|
| O          | 1.47771  | 0.80425  | 1.40577  | O           | 1.46798  | 0.99488  | 1.43543  |
| N          | -0.70244 | 1.33766  | 1.68438  | N           | -0.74367 | 1.49427  | 1.56713  |
| H          | -1.66542 | 1.07846  | 1.47386  | H           | -1.68447 | 1.21327  | 1.28861  |
| C          | -0.46477 | 2.39679  | 2.65257  | C           | -0.59409 | 2.61583  | 2.48224  |
| H          | -1.16153 | 3.21199  | 2.46448  | H           | 0.45299  | 2.89977  | 2.53421  |
| H          | -0.61318 | 2.02834  | 3.66918  | H           | -1.18618 | 3.45590  | 2.12129  |
| H          | 0.55611  | 2.75503  | 2.55421  | H           | -0.93955 | 2.33924  | 3.47929  |
| Sb         | -4.74182 | 0.00298  | -0.01500 | Sb          | -4.78136 | -0.03323 | -0.03714 |
| F          | -3.23521 | 0.61548  | 1.00788  | F           | -3.18871 | 0.70734  | 0.74237  |
| F          | -3.91776 | 0.72018  | -1.57956 | F           | -4.71291 | 1.33117  | -1.36228 |
| F          | -3.86114 | -1.65524 | -0.29491 | F           | -3.70451 | -1.14121 | -1.14278 |
| F          | -5.51518 | -0.68464 | 1.57840  | F           | -4.76791 | -1.36981 | 1.31365  |
| F          | -6.22723 | -0.58881 | -1.04772 | F           | -6.35660 | -0.76842 | -0.81135 |
| F          | -5.58036 | 1.68036  | 0.29284  | F           | -5.81875 | 1.10130  | 1.08100  |
| <b>TS3</b> |          |          |          | <b>INT3</b> |          |          |          |
| Ru         | -2.94627 | 0.15833  | -0.05949 | Ru          | -2.90737 | 0.37009  | -0.09923 |
| C          | -3.06880 | 2.07883  | -1.20421 | C           | -3.63020 | 1.99018  | -1.40623 |
| C          | -3.19532 | 0.98353  | -2.07933 | C           | -3.55467 | 0.78049  | -2.13349 |
| C          | -4.18816 | -0.02205 | -1.89412 | C           | -4.30850 | -0.38001 | -1.77172 |
| C          | -5.07437 | 0.04078  | -0.80352 | C           | -5.04307 | -0.39550 | -0.58846 |
| C          | -4.92952 | 1.12224  | 0.11744  | C           | -5.04595 | 0.79820  | 0.21318  |
| C          | -3.95216 | 2.11271  | -0.08399 | C           | -4.40812 | 1.97399  | -0.20967 |
| H          | -2.47498 | 0.86172  | -2.87803 | H           | -2.90159 | 0.72796  | -2.99427 |
| H          | -4.20034 | -0.86843 | -2.56309 | H           | -4.21032 | -1.27047 | -2.37432 |
| H          | -5.54460 | 1.15376  | 1.00581  | H           | -5.54450 | 0.78473  | 1.17277  |
| H          | -3.82496 | 2.88287  | 0.66475  | H           | -4.43658 | 2.85014  | 0.42316  |
| C          | -2.01920 | 3.12644  | -1.40290 | C           | -2.89588 | 3.21841  | -1.84415 |
| H          | -1.19352 | 2.74129  | -1.99998 | H           | -2.02674 | 2.95617  | -2.44669 |
| H          | -2.44438 | 3.98689  | -1.92544 | H           | -3.55055 | 3.85244  | -2.44758 |
| H          | -1.62581 | 3.47057  | -0.44781 | H           | -2.55819 | 3.79664  | -0.98494 |
| C          | -6.10607 | -1.02120 | -0.51950 | C           | -5.77429 | -1.60991 | -0.07170 |
| H          | -6.12492 | -1.14349 | 0.56704  | H           | -5.66290 | -1.59199 | 1.01715  |
| C          | -7.48147 | -0.50153 | -0.96860 | C           | -7.27079 | -1.47456 | -0.39276 |
| H          | -7.50363 | -0.35647 | -2.05095 | H           | -7.43219 | -1.48489 | -1.47295 |
| H          | -8.25529 | -1.22438 | -0.70616 | H           | -7.82684 | -2.30555 | 0.04414  |
| H          | -7.72819 | 0.44894  | -0.49275 | H           | -7.68229 | -0.54457 | 0.00286  |
| C          | -5.79303 | -2.37951 | -1.14109 | C           | -5.21669 | -2.93597 | -0.58310 |
| H          | -6.53432 | -3.10886 | -0.81209 | H           | -5.71782 | -3.76491 | -0.08174 |
| H          | -5.83585 | -2.34335 | -2.23193 | H           | -5.38358 | -3.05612 | -1.65558 |
| H          | -4.80864 | -2.73352 | -0.83687 | H           | -4.14542 | -3.02229 | -0.39501 |
| O          | -1.89175 | -1.09855 | 2.61304  | O           | -1.59787 | -2.63304 | 0.78351  |

|             |          |          |          |            |          |          |          |
|-------------|----------|----------|----------|------------|----------|----------|----------|
| C           | -2.77506 | -1.85421 | 2.11842  | C          | -2.29909 | -2.06301 | 1.73899  |
| O           | -3.38088 | -1.59235 | 1.04002  | O          | -2.78194 | -0.93228 | 1.65067  |
| C           | -3.11860 | -3.12631 | 2.83866  | C          | -2.47589 | -2.90300 | 2.95851  |
| H           | -2.25703 | -3.79549 | 2.79490  | H          | -2.90261 | -3.86731 | 2.67826  |
| H           | -3.97912 | -3.60937 | 2.38398  | H          | -3.11802 | -2.39781 | 3.67351  |
| H           | -3.31297 | -2.90984 | 3.88916  | H          | -1.49821 | -3.09565 | 3.40441  |
| C           | -0.10794 | 0.78779  | 0.48742  | Sb         | 5.29153  | -0.26311 | -0.14954 |
| C           | 0.97189  | 1.65404  | 0.61722  | F          | 4.75444  | -1.58083 | 1.11245  |
| C           | 0.85947  | 2.76069  | 1.45058  | F          | 3.60954  | 0.62858  | 0.14127  |
| C           | -0.31592 | 2.98793  | 2.16126  | F          | 5.75440  | 1.06916  | -1.42174 |
| C           | -1.39108 | 2.11706  | 2.03156  | F          | 6.93974  | -1.16067 | -0.44127 |
| C           | -1.31849 | 1.01312  | 1.17875  | F          | 6.04679  | 0.78464  | 1.24474  |
| H           | 1.89326  | 1.48143  | 0.07842  | F          | 4.44791  | -1.27102 | -1.53431 |
| H           | 1.69518  | 3.44166  | 1.55136  | C          | -0.15381 | 1.20611  | 0.49606  |
| H           | -0.38939 | 3.84297  | 2.82249  | C          | 0.92627  | 1.93515  | 1.00547  |
| H           | -2.28889 | 2.28099  | 2.61542  | C          | 0.68555  | 3.00521  | 1.84805  |
| H           | -1.79038 | -0.07387 | 1.78426  | C          | -0.62708 | 3.33104  | 2.18581  |
| C           | -0.11873 | -0.40664 | -0.37646 | C          | -1.69768 | 2.60490  | 1.67585  |
| O           | -1.23590 | -0.94937 | -0.64048 | C          | -1.49040 | 1.53344  | 0.80639  |
| N           | 0.99708  | -0.92405 | -0.85282 | H          | 1.94411  | 1.66635  | 0.75481  |
| H           | 1.88966  | -0.50395 | -0.61275 | H          | 1.51224  | 3.57869  | 2.24691  |
| C           | 1.01305  | -2.10362 | -1.70295 | H          | -0.81674 | 4.16274  | 2.85518  |
| H           | 0.35772  | -1.96262 | -2.56248 | H          | -2.70110 | 2.88532  | 1.97081  |
| H           | 2.03375  | -2.26006 | -2.04271 | H          | -1.42825 | -1.97410 | 0.05427  |
| H           | 0.67630  | -2.98338 | -1.15260 | C          | -0.01259 | 0.03470  | -0.35968 |
| Sb          | 5.35793  | -0.23360 | -0.16228 | O          | -1.09030 | -0.55123 | -0.74986 |
| F           | 3.49437  | 0.11867  | -0.47314 | N          | 1.15066  | -0.46119 | -0.72867 |
| F           | 5.79344  | 1.07029  | -1.47464 | H          | 2.00402  | -0.02052 | -0.40127 |
| F           | 5.34660  | 1.11958  | 1.17274  | C          | 1.27934  | -1.64524 | -1.56790 |
| F           | 4.84632  | -1.52807 | 1.13487  | H          | 0.65931  | -1.54438 | -2.45788 |
| F           | 7.19772  | -0.58784 | 0.15179  | H          | 2.32415  | -1.74035 | -1.84688 |
| F           | 5.28802  | -1.57032 | -1.51460 | H          | 0.96908  | -2.54124 | -1.02695 |
| <b>INT4</b> |          |          |          | <b>TS4</b> |          |          |          |
| Ru          | 1.23760  | -0.41985 | -0.25568 | Ru         | -1.92168 | -0.27649 | 0.73962  |
| C           | 0.30109  | -1.01258 | -2.33347 | C          | -2.76872 | -1.15366 | 2.72366  |
| C           | -0.24704 | 0.18804  | -1.86585 | C          | -3.05076 | 0.21028  | 2.63590  |
| C           | 0.56195  | 1.33159  | -1.61797 | C          | -3.72844 | 0.76509  | 1.50559  |
| C           | 1.94436  | 1.29762  | -1.82224 | C          | -4.18981 | -0.04578 | 0.45465  |
| C           | 2.51613  | 0.01559  | -2.06906 | C          | -3.80097 | -1.41589 | 0.48591  |
| C           | 1.72006  | -1.11661 | -2.33326 | C          | -3.08299 | -1.94715 | 1.57736  |
| H           | -1.30506 | 0.26937  | -1.69115 | H          | -2.71051 | 0.87830  | 3.41612  |

|    |          |          |          |    |          |          |          |
|----|----------|----------|----------|----|----------|----------|----------|
| H  | 0.07458  | 2.23720  | -1.28895 | H  | -3.88238 | 1.83347  | 1.47233  |
| H  | 3.59132  | -0.08218 | -2.11897 | H  | -4.04781 | -2.05698 | -0.34952 |
| H  | 2.20118  | -2.05465 | -2.57361 | H  | -2.78586 | -2.98718 | 1.55202  |
| C  | -0.58768 | -2.14526 | -2.72702 | C  | -2.07610 | -1.74428 | 3.90777  |
| H  | -1.47204 | -2.17209 | -2.09266 | H  | -1.58651 | -0.97256 | 4.50003  |
| H  | -0.91219 | -1.98528 | -3.75916 | H  | -2.80323 | -2.25525 | 4.54413  |
| H  | -0.07267 | -3.10092 | -2.67590 | H  | -1.33053 | -2.47610 | 3.59992  |
| C  | 2.80361  | 2.53191  | -1.81068 | C  | -5.05041 | 0.47512  | -0.66612 |
| H  | 3.81207  | 2.23269  | -1.52410 | H  | -4.92318 | -0.20487 | -1.50924 |
| C  | 2.86318  | 3.07010  | -3.25300 | C  | -6.51814 | 0.41040  | -0.21083 |
| H  | 1.87456  | 3.39181  | -3.58742 | H  | -6.69521 | 1.09132  | 0.62490  |
| H  | 3.53564  | 3.92801  | -3.29616 | H  | -7.17428 | 0.70100  | -1.03260 |
| H  | 3.22930  | 2.31381  | -3.94937 | H  | -6.79514 | -0.59636 | 0.10695  |
| C  | 2.33425  | 3.60716  | -0.83498 | C  | -4.67188 | 1.87494  | -1.13967 |
| H  | 3.03762  | 4.44000  | -0.84652 | H  | -5.32023 | 2.16697  | -1.96669 |
| H  | 1.35387  | 4.00075  | -1.10942 | H  | -4.79071 | 2.61810  | -0.34933 |
| H  | 2.29397  | 3.22015  | 0.18138  | H  | -3.64381 | 1.89566  | -1.49645 |
| Sb | -4.06508 | 0.23055  | -0.41935 | Sb | 4.45836  | 0.21682  | -0.47161 |
| F  | -2.65497 | -1.05864 | -0.39812 | F  | 2.59877  | -0.11604 | -0.69845 |
| F  | -2.99963 | 1.36854  | -1.53213 | F  | 4.10885  | 1.09084  | 1.21898  |
| F  | -5.45088 | 1.53252  | -0.43416 | F  | 6.30912  | 0.56340  | -0.22169 |
| F  | -5.10054 | -0.90615 | 0.70424  | F  | 4.79737  | -0.61805 | -2.14266 |
| F  | -4.78740 | -0.60161 | -1.97194 | F  | 4.62474  | -1.43647 | 0.44465  |
| F  | -3.30006 | 1.05484  | 1.11388  | F  | 4.21504  | 1.90385  | -1.31415 |
| C  | -0.52397 | -2.23710 | 1.24969  | C  | 0.88708  | -0.23848 | 1.64920  |
| C  | -1.19647 | -3.39892 | 1.63478  | C  | 1.87523  | -0.58935 | 2.55769  |
| C  | -0.82700 | -4.61642 | 1.09406  | C  | 2.04877  | -1.92128 | 2.90908  |
| C  | 0.23265  | -4.67068 | 0.19013  | C  | 1.21992  | -2.88971 | 2.35589  |
| C  | 0.89702  | -3.51420 | -0.20012 | C  | 0.22973  | -2.54419 | 1.44475  |
| C  | 0.50192  | -2.27754 | 0.29528  | C  | 0.03408  | -1.21267 | 1.08316  |
| H  | -2.00951 | -3.35822 | 2.35138  | H  | 2.50024  | 0.17300  | 3.00294  |
| H  | -1.34729 | -5.52062 | 1.38180  | H  | 2.82437  | -2.19925 | 3.61036  |
| H  | 0.54573  | -5.62585 | -0.21498 | H  | 1.34713  | -3.93049 | 2.62775  |
| H  | 1.73007  | -3.59182 | -0.88523 | H  | -0.36905 | -3.32437 | 1.00071  |
| C  | -0.74301 | -0.91967 | 1.82832  | C  | 0.59442  | 1.14412  | 1.27342  |
| O  | -0.06522 | 0.04936  | 1.33679  | O  | -0.59601 | 1.41158  | 0.89898  |
| N  | -1.52524 | -0.71050 | 2.86747  | N  | 1.52929  | 2.06907  | 1.30014  |
| H  | -2.07750 | -1.48556 | 3.21042  | H  | 2.48631  | 1.75158  | 1.42848  |
| C  | -1.64821 | 0.57812  | 3.54040  | C  | 1.31590  | 3.43984  | 0.85966  |
| H  | -2.11878 | 0.41136  | 4.50581  | H  | 2.26480  | 3.96458  | 0.92594  |
| H  | -0.65942 | 1.00926  | 3.68939  | H  | 0.96262  | 3.46071  | -0.17195 |

|             |          |          |          |             |          |          |          |
|-------------|----------|----------|----------|-------------|----------|----------|----------|
| H           | -2.25904 | 1.25532  | 2.94731  | H           | 0.58555  | 3.93898  | 1.49631  |
| C           | 2.64807  | -1.13676 | 1.26272  | C           | -0.25681 | -0.98058 | -0.78551 |
| C           | 2.68489  | 0.26982  | 1.26265  | C           | -1.28402 | -0.07401 | -1.27382 |
| H           | 2.16504  | -1.75218 | 2.00293  | H           | 0.77807  | -0.67178 | -0.87539 |
| H           | 2.16761  | 0.92022  | 1.95244  | H           | -1.05280 | 0.95575  | -1.50826 |
| C           | 3.91016  | -1.62585 | 0.63495  | C           | -0.55605 | -2.32540 | -1.43645 |
| O           | 4.25828  | -2.76651 | 0.41574  | O           | 0.06911  | -3.35751 | -1.34105 |
| C           | 4.02459  | 0.67207  | 0.73940  | C           | -2.11461 | -0.82385 | -2.23873 |
| O           | 4.51480  | 1.78037  | 0.68997  | O           | -3.00759 | -0.42296 | -2.95587 |
| N           | 4.66822  | -0.49342 | 0.33520  | N           | -1.67374 | -2.15367 | -2.22486 |
| C           | 5.98115  | -0.52590 | -0.29502 | C           | -2.26733 | -3.21567 | -3.02747 |
| H           | 6.07253  | 0.37882  | -0.89641 | H           | -3.32939 | -2.98934 | -3.11575 |
| H           | 5.99270  | -1.38853 | -0.96113 | H           | -2.15356 | -4.14288 | -2.46665 |
| C           | 7.10988  | -0.61182 | 0.72409  | C           | -1.62042 | -3.32799 | -4.40196 |
| H           | 7.02092  | -1.52000 | 1.32141  | H           | -0.55636 | -3.54801 | -4.31033 |
| H           | 8.07358  | -0.63002 | 0.21262  | H           | -2.09041 | -4.13284 | -4.96928 |
| H           | 7.09127  | 0.24988  | 1.39209  | H           | -1.73959 | -2.39875 | -4.95990 |
| H           | -0.45051 | 1.75961  | 1.29650  | H           | -1.44124 | 2.85917  | 0.49487  |
| O           | -0.57743 | 2.73062  | 1.17037  | O           | -2.02280 | 3.64062  | 0.32548  |
| O           | 0.99941  | 2.83328  | 2.76197  | O           | -1.19921 | 3.39635  | -1.74457 |
| C           | 0.22917  | 3.39180  | 2.00772  | C           | -1.91710 | 3.98614  | -0.96490 |
| C           | 0.05743  | 4.87905  | 1.90898  | C           | -2.77994 | 5.16265  | -1.31482 |
| H           | -0.93485 | 5.14968  | 2.27627  | H           | -2.52262 | 6.01251  | -0.68057 |
| H           | 0.81643  | 5.38137  | 2.50183  | H           | -2.64672 | 5.42296  | -2.36088 |
| H           | 0.11595  | 5.19735  | 0.86801  | H           | -3.82614 | 4.91850  | -1.12336 |
| <b>INT5</b> |          |          |          | <b>INT6</b> |          |          |          |
| Ru          | 2.27665  | -0.69496 | 0.22761  | Ru          | 2.52101  | -0.98353 | 0.43306  |
| C           | 2.82178  | -1.57593 | 2.26146  | C           | 3.69659  | -2.10755 | 2.02823  |
| C           | 3.02723  | -2.58317 | 1.30041  | C           | 2.96113  | -3.05838 | 1.30389  |
| C           | 3.76289  | -2.29217 | 0.13170  | C           | 3.01114  | -3.05089 | -0.11332 |
| C           | 4.40834  | -1.03757 | -0.06943 | C           | 3.85917  | -2.18324 | -0.84575 |
| C           | 4.25020  | -0.05769 | 0.94995  | C           | 4.62916  | -1.25537 | -0.08886 |
| C           | 3.44145  | -0.30324 | 2.07219  | C           | 4.53488  | -1.19477 | 1.31459  |
| H           | 2.53407  | -3.53955 | 1.40397  | H           | 2.27553  | -3.72006 | 1.81382  |
| H           | 3.79004  | -3.03098 | -0.65628 | H           | 2.32696  | -3.69191 | -0.65029 |
| H           | 4.67043  | 0.92593  | 0.79776  | H           | 5.23591  | -0.52224 | -0.60380 |
| H           | 3.26036  | 0.48873  | 2.78622  | H           | 5.08071  | -0.43362 | 1.85336  |
| C           | 1.98696  | -1.83010 | 3.47451  | C           | 3.57346  | -2.00312 | 3.51573  |
| H           | 1.22023  | -2.57833 | 3.28311  | H           | 2.60069  | -2.35381 | 3.85752  |
| H           | 2.63310  | -2.20098 | 4.27555  | H           | 4.34345  | -2.61690 | 3.99080  |
| H           | 1.50887  | -0.91815 | 3.82506  | H           | 3.72150  | -0.97688 | 3.85106  |

|   |          |          |          |   |          |          |          |
|---|----------|----------|----------|---|----------|----------|----------|
| C | 5.23787  | -0.73200 | -1.29146 | C | 3.97120  | -2.21832 | -2.35057 |
| H | 5.18524  | 0.35011  | -1.42895 | H | 4.28006  | -1.21568 | -2.66360 |
| C | 6.69956  | -1.11727 | -1.02348 | C | 5.08101  | -3.19719 | -2.75828 |
| H | 6.79424  | -2.19428 | -0.86381 | H | 4.82186  | -4.21616 | -2.46082 |
| H | 7.32222  | -0.84609 | -1.87775 | H | 5.21996  | -3.18441 | -3.84062 |
| H | 7.09187  | -0.60760 | -0.14170 | H | 6.03198  | -2.93931 | -2.28884 |
| C | 4.71233  | -1.39684 | -2.56339 | C | 2.65400  | -2.54283 | -3.05486 |
| H | 5.27230  | -1.03218 | -3.42546 | H | 2.78023  | -2.44600 | -4.13396 |
| H | 4.83393  | -2.48206 | -2.53429 | H | 2.33348  | -3.56758 | -2.85625 |
| H | 3.65607  | -1.17752 | -2.72164 | H | 1.85602  | -1.87195 | -2.73672 |
| C | -0.36162 | -0.91101 | 0.11258  | C | -0.68595 | 0.54445  | 0.16426  |
| C | -0.98172 | -1.81052 | 0.98708  | C | -1.67358 | 0.73621  | 1.12628  |
| C | -1.26553 | -1.43121 | 2.28296  | C | -1.84001 | 1.97439  | 1.72651  |
| C | -0.92032 | -0.15446 | 2.72079  | C | -1.01637 | 3.02494  | 1.35134  |
| C | -0.32533 | 0.74618  | 1.86030  | C | -0.05219 | 2.84116  | 0.36559  |
| C | -0.04326 | 0.40289  | 0.52896  | C | 0.13272  | 1.60379  | -0.24646 |
| H | -1.23350 | -2.80223 | 0.63364  | H | -2.30563 | -0.08854 | 1.42119  |
| H | -1.75850 | -2.12356 | 2.95314  | H | -2.60957 | 2.11119  | 2.47491  |
| H | -1.14201 | 0.14653  | 3.73684  | H | -1.13117 | 4.00024  | 1.80820  |
| H | -0.11698 | 1.74785  | 2.20684  | H | 0.54485  | 3.69267  | 0.06883  |
| C | 0.01541  | -1.38258 | -1.25327 | C | -0.50200 | -0.82136 | -0.38246 |
| O | 1.24636  | -1.45347 | -1.51695 | O | 0.60950  | -1.40645 | -0.41680 |
| N | -0.91882 | -1.74735 | -2.10175 | N | -1.58654 | -1.44305 | -0.81867 |
| H | -1.88098 | -1.53600 | -1.83902 | H | -2.45222 | -0.91389 | -0.86299 |
| C | -0.61669 | -2.25728 | -3.43143 | C | -1.57351 | -2.81271 | -1.30062 |
| H | 0.14455  | -3.03316 | -3.36736 | H | -1.04914 | -3.45465 | -0.59348 |
| H | -1.52725 | -2.67476 | -3.85321 | H | -2.60390 | -3.14521 | -1.39912 |
| H | -0.24946 | -1.46035 | -4.08016 | H | -1.07347 | -2.88505 | -2.26820 |
| C | 0.47080  | 1.42177  | -0.49017 | C | 1.17463  | 1.39089  | -1.33404 |
| C | 1.90744  | 1.08518  | -0.88944 | C | 2.47996  | 0.73478  | -0.82297 |
| H | -0.22066 | 1.45288  | -1.33743 | H | 0.73337  | 0.83166  | -2.15848 |
| H | 2.04869  | 0.77860  | -1.92221 | H | 2.98725  | 0.35720  | -1.71922 |
| C | 0.55562  | 2.83618  | 0.07508  | C | 1.66879  | 2.74058  | -1.84750 |
| O | -0.35682 | 3.51282  | 0.50063  | O | 1.13460  | 3.48964  | -2.63146 |
| C | 2.70627  | 2.28883  | -0.58655 | C | 3.30907  | 1.92505  | -0.45940 |
| O | 3.88254  | 2.50733  | -0.81876 | O | 4.25012  | 1.99026  | 0.32408  |
| N | 1.87244  | 3.23237  | 0.02670  | N | 2.85879  | 3.01603  | -1.18257 |
| C | 2.32735  | 4.55259  | 0.44587  | C | 3.54770  | 4.30109  | -1.24390 |
| H | 3.36018  | 4.44088  | 0.77266  | H | 3.98833  | 4.47069  | -0.26218 |
| H | 1.71728  | 4.84476  | 1.29984  | H | 2.78701  | 5.06013  | -1.42250 |
| C | 2.22064  | 5.57836  | -0.67561 | C | 4.61097  | 4.32781  | -2.33352 |

|            |          |          |          |             |          |          |          |
|------------|----------|----------|----------|-------------|----------|----------|----------|
| H          | 1.18647  | 5.68348  | -1.00547 | H           | 4.16425  | 4.15582  | -3.31343 |
| H          | 2.56875  | 6.55110  | -0.32474 | H           | 5.10473  | 5.30056  | -2.34745 |
| H          | 2.83283  | 5.28187  | -1.52802 | H           | 5.36826  | 3.56298  | -2.15492 |
| Sb         | -4.64474 | -0.02193 | -0.15782 | O           | 1.51598  | 0.08845  | 1.99807  |
| F          | -3.26620 | -0.88251 | -1.18432 | C           | 1.86649  | 0.96991  | 2.78166  |
| F          | -5.91234 | -0.60554 | -1.45034 | O           | 2.98523  | 1.65326  | 2.68492  |
| F          | -4.87161 | -1.65201 | 0.80052  | C           | 1.03296  | 1.33448  | 3.96433  |
| F          | -3.33633 | 0.54396  | 1.08862  | H           | 0.09387  | 0.79136  | 3.93938  |
| F          | -6.02086 | 0.81244  | 0.86053  | H           | 1.58386  | 1.09185  | 4.87584  |
| F          | -4.35614 | 1.57024  | -1.15998 | H           | 0.84794  | 2.40840  | 3.96609  |
|            |          |          |          | H           | 3.48314  | 1.49673  | 1.83914  |
|            |          |          |          | Sb          | -5.51688 | -0.20200 | -0.17141 |
|            |          |          |          | F           | -3.84886 | 0.11407  | -1.07985 |
|            |          |          |          | F           | -5.91366 | 1.64656  | -0.34708 |
|            |          |          |          | F           | -6.32483 | -0.55321 | -1.85560 |
|            |          |          |          | F           | -5.00892 | -2.03625 | -0.01713 |
|            |          |          |          | F           | -7.16855 | -0.53200 | 0.70861  |
|            |          |          |          | F           | -4.68083 | 0.13136  | 1.50692  |
| <b>TS5</b> |          |          |          | <b>INT7</b> |          |          |          |
| Ru         | 2.32988  | -1.17018 | 0.49070  | Ru          | -2.11877 | -1.96102 | -0.28531 |
| C          | 3.21450  | -2.62433 | 1.92442  | C           | -2.78951 | -4.04364 | -0.30501 |
| C          | 2.43128  | -3.31926 | 0.96814  | C           | -2.11978 | -3.78403 | 0.93121  |
| C          | 2.66986  | -3.14102 | -0.41622 | C           | -2.50743 | -2.71551 | 1.75276  |
| C          | 3.67837  | -2.27395 | -0.89919 | C           | -3.59128 | -1.85863 | 1.39337  |
| C          | 4.44319  | -1.57325 | 0.07478  | C           | -4.25713 | -2.12558 | 0.18046  |
| C          | 4.22444  | -1.74083 | 1.45977  | C           | -3.86406 | -3.20162 | -0.66357 |
| H          | 1.60412  | -3.93317 | 1.29422  | H           | -1.24422 | -4.36387 | 1.19193  |
| H          | 1.98114  | -3.59589 | -1.11348 | H           | -1.90918 | -2.49036 | 2.62310  |
| H          | 5.14072  | -0.81261 | -0.24857 | H           | -5.02690 | -1.44450 | -0.16037 |
| H          | 4.77840  | -1.13683 | 2.16399  | H           | -4.33858 | -3.32274 | -1.62710 |
| C          | 2.91765  | -2.74955 | 3.38255  | C           | -2.30458 | -5.12108 | -1.22050 |
| H          | 1.85043  | -2.88081 | 3.55324  | H           | -1.21819 | -5.19767 | -1.18907 |
| H          | 3.43976  | -3.62429 | 3.77964  | H           | -2.72347 | -6.08204 | -0.91083 |
| H          | 3.26026  | -1.87359 | 3.93091  | H           | -2.61250 | -4.92881 | -2.24719 |
| C          | 3.94317  | -2.05210 | -2.36893 | C           | -4.02382 | -0.69711 | 2.25532  |
| H          | 4.32164  | -1.02908 | -2.46338 | H           | -4.45700 | 0.04848  | 1.58281  |
| C          | 5.05184  | -3.00734 | -2.83316 | C           | -5.13672 | -1.17182 | 3.20255  |
| H          | 4.72717  | -4.04622 | -2.73793 | H           | -4.76334 | -1.94198 | 3.88144  |
| H          | 5.29513  | -2.82158 | -3.88037 | H           | -5.49559 | -0.33513 | 3.80373  |
| H          | 5.96092  | -2.87974 | -2.24316 | H           | -5.98247 | -1.58420 | 2.65030  |
| C          | 2.69512  | -2.17896 | -3.24254 | C           | -2.88085 | -0.04239 | 3.03176  |

|   |          |          |          |   |          |          |          |
|---|----------|----------|----------|---|----------|----------|----------|
| H | 2.93324  | -1.88557 | -4.26535 | H | -3.23786 | 0.87456  | 3.50208  |
| H | 2.33161  | -3.20823 | -3.27691 | H | -2.51633 | -0.69286 | 3.82984  |
| H | 1.88383  | -1.54602 | -2.88102 | H | -2.04189 | 0.20125  | 2.38125  |
| C | -0.69152 | 0.76209  | 0.29804  | C | 0.32033  | 1.16376  | -1.06777 |
| C | -1.76620 | 0.76846  | 1.18500  | C | 1.37678  | 1.11961  | -1.98377 |
| C | -1.96918 | 1.84676  | 2.03049  | C | 1.48415  | 2.05943  | -2.99424 |
| C | -1.09649 | 2.92485  | 1.97829  | C | 0.53000  | 3.06271  | -3.09803 |
| C | -0.03911 | 2.92916  | 1.07595  | C | -0.51549 | 3.12035  | -2.18689 |
| C | 0.18125  | 1.85519  | 0.21930  | C | -0.64423 | 2.18324  | -1.16506 |
| H | -2.42727 | -0.08533 | 1.22990  | H | 2.10589  | 0.32485  | -1.92652 |
| H | -2.80510 | 1.84184  | 2.71705  | H | 2.30344  | 2.00244  | -3.69932 |
| H | -1.23965 | 3.77485  | 2.63410  | H | 0.59904  | 3.80412  | -3.88444 |
| H | 0.61430  | 3.78949  | 1.03834  | H | -1.24248 | 3.91920  | -2.26931 |
| C | -0.52482 | -0.43511 | -0.56444 | C | 0.20707  | 0.07191  | -0.06971 |
| O | 0.53874  | -1.10965 | -0.65026 | O | -0.92605 | -0.31897 | 0.34289  |
| N | -1.58271 | -0.80495 | -1.26054 | N | 1.30863  | -0.48614 | 0.38878  |
| H | -2.41541 | -0.22701 | -1.19892 | H | 2.21292  | -0.11004 | 0.11680  |
| C | -1.64218 | -2.02873 | -2.04069 | C | 1.28804  | -1.64360 | 1.26814  |
| H | -1.23109 | -2.85804 | -1.46634 | H | 0.88768  | -2.50993 | 0.73792  |
| H | -2.68501 | -2.22853 | -2.27320 | H | 2.30863  | -1.83926 | 1.58275  |
| H | -1.07522 | -1.93183 | -2.96793 | H | 0.66134  | -1.44505 | 2.13717  |
| C | 1.31711  | 1.84600  | -0.78503 | C | -1.81288 | 2.28941  | -0.21972 |
| C | 2.54492  | 0.98224  | -0.42939 | C | -3.12589 | 1.68011  | -0.73326 |
| H | 0.90968  | 1.51621  | -1.74528 | H | -1.55649 | 1.81850  | 0.72870  |
| H | 2.71116  | 0.25729  | -1.22600 | H | -3.31204 | 0.67796  | -0.36123 |
| C | 1.91071  | 3.22882  | -1.04577 | C | -2.19946 | 3.71647  | 0.16194  |
| O | 1.31866  | 4.22396  | -1.40020 | O | -1.46267 | 4.62106  | 0.48055  |
| C | 3.72798  | 1.89551  | -0.51076 | C | -4.20106 | 2.64125  | -0.29019 |
| O | 4.89822  | 1.61445  | -0.34460 | O | -5.40117 | 2.47164  | -0.31940 |
| N | 3.27436  | 3.16958  | -0.82898 | N | -3.58430 | 3.80147  | 0.15284  |
| C | 4.16744  | 4.30688  | -1.03085 | C | -4.31628 | 4.97786  | 0.61388  |
| H | 4.99281  | 4.18735  | -0.33070 | H | -5.24611 | 5.01308  | 0.04829  |
| H | 3.60531  | 5.20036  | -0.76319 | H | -3.71327 | 5.84685  | 0.35418  |
| C | 4.67430  | 4.38834  | -2.46486 | C | -4.58868 | 4.92971  | 2.11171  |
| H | 3.84379  | 4.50118  | -3.16273 | H | -3.65479 | 4.88765  | 2.67367  |
| H | 5.33478  | 5.24941  | -2.57707 | H | -5.13265 | 5.82399  | 2.41917  |
| H | 5.23483  | 3.49051  | -2.72786 | H | -5.19147 | 4.05735  | 2.36734  |
| O | 1.24470  | -0.44259 | 2.17366  | O | -0.50173 | -2.27195 | -1.67993 |
| C | 1.66386  | 0.61347  | 2.72108  | C | -1.02560 | -1.46687 | -2.51714 |
| O | 2.54228  | 1.35401  | 2.17588  | O | -2.13390 | -0.94204 | -2.18670 |
| C | 1.12954  | 0.99118  | 4.06671  | C | -0.38255 | -1.16367 | -3.82641 |



|            |          |          |          |             |          |          |          |
|------------|----------|----------|----------|-------------|----------|----------|----------|
| H          | 0.13796  | 0.56954  | 4.20882  | H           | 0.66368  | -1.45886 | -3.81571 |
| H          | 1.79745  | 0.58124  | 4.82895  | H           | -0.90237 | -1.72213 | -4.60848 |
| H          | 1.10808  | 2.07268  | 4.17506  | H           | -0.47597 | -0.10195 | -4.04714 |
| H          | 2.61122  | 0.94967  | 0.98946  | H           | -3.14297 | 1.62150  | -1.82281 |
| Sb         | -5.35020 | -0.17990 | -0.29989 | Sb          | 5.42963  | 0.10880  | 0.59832  |
| F          | -3.90259 | 0.75576  | -1.16899 | F           | 3.80856  | 0.47221  | -0.37745 |
| F          | -6.55243 | 1.17204  | -0.87676 | F           | 6.29707  | 1.47983  | -0.39091 |
| F          | -5.61758 | -1.14113 | -1.92149 | F           | 4.88777  | 1.37812  | 1.90525  |
| F          | -4.08891 | -1.50228 | 0.25512  | F           | 4.47451  | -1.24759 | 1.54638  |
| F          | -6.76349 | -1.13812 | 0.53539  | F           | 7.01907  | -0.26703 | 1.56885  |
| F          | -5.02056 | 0.77872  | 1.30831  | F           | 5.90519  | -1.16901 | -0.72598 |
| <b>TS6</b> |          |          |          | <b>HOAc</b> |          |          |          |
| Ru         | 0.60099  | 1.52618  | 0.76530  | H           | 1.87932  | 0.40963  | 0.00000  |
| C          | 1.97776  | 3.24277  | 0.78191  | O           | 1.25139  | -0.34473 | 0.00000  |
| C          | 1.84243  | 2.77156  | -0.54002 | O           | -0.23289 | 1.33858  | 0.00000  |
| C          | 0.56247  | 2.64372  | -1.15338 | C           | 0.00000  | 0.15162  | 0.00000  |
| C          | -0.61824 | 2.96599  | -0.46773 | C           | -1.03276 | -0.93767 | 0.00000  |
| C          | -0.48541 | 3.35344  | 0.90293  | H           | -0.90130 | -1.57055 | 0.87927  |
| C          | 0.78115  | 3.51945  | 1.50773  | H           | -2.02818 | -0.50307 | 0.00000  |
| H          | 2.71418  | 2.42474  | -1.07344 | H           | -0.90130 | -1.57055 | -0.87927 |
| H          | 0.50945  | 2.18624  | -2.12830 |             |          |          |          |
| H          | -1.37222 | 3.47979  | 1.50839  |             |          |          |          |
| H          | 0.84110  | 3.76334  | 2.55923  |             |          |          |          |
| C          | 3.30837  | 3.33349  | 1.45513  |             |          |          |          |
| H          | 4.01724  | 2.64568  | 1.00251  |             |          |          |          |
| H          | 3.69088  | 4.35370  | 1.36420  |             |          |          |          |
| H          | 3.21806  | 3.09903  | 2.51562  |             |          |          |          |
| C          | -2.00580 | 2.86344  | -1.06070 |             |          |          |          |
| H          | -2.58799 | 2.22700  | -0.38583 |             |          |          |          |
| C          | -2.64669 | 4.26165  | -1.05992 |             |          |          |          |
| H          | -2.08453 | 4.94073  | -1.70498 |             |          |          |          |
| H          | -3.66728 | 4.20013  | -1.44029 |             |          |          |          |
| H          | -2.68535 | 4.69711  | -0.06073 |             |          |          |          |
| C          | -2.05105 | 2.25666  | -2.45948 |             |          |          |          |
| H          | -3.08827 | 2.18720  | -2.79039 |             |          |          |          |
| H          | -1.52102 | 2.88788  | -3.17745 |             |          |          |          |
| H          | -1.61608 | 1.26064  | -2.46852 |             |          |          |          |
| Sb         | 3.37071  | -0.89186 | -0.62133 |             |          |          |          |
| F          | 4.14811  | 0.63353  | 0.20394  |             |          |          |          |
| F          | 2.84569  | 0.20683  | -2.09024 |             |          |          |          |
| F          | 2.57542  | -2.41102 | -1.43133 |             |          |          |          |

|   |          |          |          |
|---|----------|----------|----------|
| F | 3.79549  | -1.94115 | 0.90099  |
| F | 5.02440  | -1.28744 | -1.46404 |
| F | 1.68445  | -0.44456 | 0.22816  |
| C | -0.90695 | -2.32323 | 0.01034  |
| C | 0.00225  | -3.33988 | 0.29972  |
| C | -0.25039 | -4.24577 | 1.32139  |
| C | -1.42936 | -4.14530 | 2.04574  |
| C | -2.33035 | -3.12293 | 1.76901  |
| C | -2.07779 | -2.18514 | 0.77333  |
| H | 0.91755  | -3.40462 | -0.27251 |
| H | 0.46919  | -5.02279 | 1.54678  |
| H | -1.64779 | -4.85306 | 2.83605  |
| H | -3.23833 | -3.05946 | 2.35429  |
| C | -0.59594 | -1.38500 | -1.11485 |
| O | -0.68278 | -0.15414 | -1.00718 |
| N | -0.20692 | -1.96001 | -2.25720 |
| H | -0.19101 | -2.96741 | -2.31347 |
| C | 0.22316  | -1.18213 | -3.40445 |
| H | 0.75403  | -1.84030 | -4.08869 |
| H | -0.62913 | -0.73914 | -3.92400 |
| H | 0.89692  | -0.39216 | -3.08096 |
| C | -3.03333 | -1.05256 | 0.49268  |
| C | -3.92758 | -0.52569 | 1.61637  |
| H | -2.42590 | -0.22144 | 0.13343  |
| H | -3.49834 | 0.33057  | 2.13170  |
| C | -3.99906 | -1.32029 | -0.65203 |
| O | -3.78118 | -1.91346 | -1.68458 |
| C | -5.22104 | -0.15020 | 0.92817  |
| O | -6.14413 | 0.49150  | 1.38225  |
| N | -5.20110 | -0.69587 | -0.34660 |
| C | -6.30218 | -0.57623 | -1.29633 |
| H | -7.21605 | -0.48454 | -0.71168 |
| H | -6.33907 | -1.50582 | -1.86303 |
| C | -6.12100 | 0.61937  | -2.22288 |
| H | -5.20369 | 0.52040  | -2.80469 |
| H | -6.96007 | 0.68510  | -2.91704 |
| H | -6.07551 | 1.54766  | -1.65150 |
| O | 1.25264  | 0.59601  | 2.59470  |
| C | 0.13265  | 0.01276  | 2.73870  |
| O | -0.79077 | 0.34842  | 1.93590  |
| C | -0.06898 | -1.04548 | 3.76670  |

|   |          |          |         |  |
|---|----------|----------|---------|--|
| H | 0.64068  | -0.92389 | 4.58226 |  |
| H | -1.09237 | -1.02442 | 4.13642 |  |
| H | 0.09734  | -2.01559 | 3.29373 |  |
| H | -4.16722 | -1.27745 | 2.36985 |  |

**Table S5** Coordinates of stationary points for the reaction of **CAT+DMF+1a** and **CAT+CH<sub>3</sub>CN+1a**, computed at B3LYP-D3a+IDSCRF/TZP-DKH(-dfg) level in DMF and CH<sub>3</sub>CN solvent, respectively.

| <b>1a(DMF solvent)</b>  |          |          |          | <b>DMF(DMF solvent)</b>      |          |          |          |
|-------------------------|----------|----------|----------|------------------------------|----------|----------|----------|
| C                       | 0.24436  | 0.10679  | -0.03528 | C                            | 0.85754  | -0.64089 | -0.00000 |
| C                       | 0.79387  | -1.16652 | -0.20255 | O                            | 1.95362  | -0.09056 | -0.00001 |
| C                       | 2.17098  | -1.34830 | -0.15843 | H                            | 0.76043  | -1.73932 | -0.00000 |
| C                       | 3.01197  | -0.26220 | 0.05817  | N                            | -0.33785 | -0.02004 | 0.00000  |
| C                       | 2.47146  | 1.00998  | 0.22086  | C                            | -0.43357 | 1.42906  | -0.00000 |
| C                       | 1.09699  | 1.19383  | 0.16640  | H                            | -0.97124 | 1.77336  | 0.88731  |
| H                       | 0.15581  | -2.02148 | -0.39457 | H                            | 0.57003  | 1.84581  | -0.00001 |
| H                       | 2.58703  | -2.33905 | -0.29961 | H                            | -0.97126 | 1.77334  | -0.88732 |
| H                       | 4.08574  | -0.40575 | 0.09467  | C                            | -1.58122 | -0.76890 | 0.00000  |
| H                       | 3.12329  | 1.85987  | 0.38730  | H                            | -2.17390 | -0.52978 | -0.88706 |
| H                       | 0.66671  | 2.18043  | 0.28043  | H                            | -1.36686 | -1.83700 | 0.00004  |
| C                       | -1.23078 | 0.37362  | -0.09218 | H                            | -2.17392 | -0.52972 | 0.88702  |
| O                       | -1.67121 | 1.48592  | -0.39128 |                              |          |          |          |
| N                       | -2.05134 | -0.65961 | 0.19565  |                              |          |          |          |
| H                       | -1.66304 | -1.51649 | 0.56332  |                              |          |          |          |
| C                       | -3.49583 | -0.50698 | 0.17718  |                              |          |          |          |
| H                       | -3.83635 | 0.17772  | 0.95793  |                              |          |          |          |
| H                       | -3.82316 | -0.11320 | -0.78535 |                              |          |          |          |
| H                       | -3.95092 | -1.48272 | 0.33682  |                              |          |          |          |
| <b>CAT(DMF solvent)</b> |          |          |          | <b>COM1-DMF(DMF solvent)</b> |          |          |          |
| Ru                      | 1.24111  | 0.54965  | 0.20503  | Ru                           | -2.30740 | -0.21948 | -0.08822 |
| C                       | 1.56611  | 0.11138  | 2.36236  | C                            | -3.12879 | -0.88006 | -2.04146 |
| C                       | 0.97766  | -1.00703 | 1.74463  | C                            | -1.75096 | -0.60645 | -2.18307 |
| C                       | 1.53661  | -1.60450 | 0.58045  | C                            | -0.78032 | -1.20051 | -1.34052 |
| C                       | 2.70706  | -1.08906 | -0.00890 | C                            | -1.16590 | -2.10448 | -0.31736 |
| C                       | 3.30586  | 0.05788  | 0.60295  | C                            | -2.55034 | -2.40573 | -0.17561 |
| C                       | 2.74606  | 0.64353  | 1.75761  | C                            | -3.50381 | -1.79267 | -1.01261 |
| H                       | 0.02137  | -1.36543 | 2.10016  | H                            | -1.43746 | 0.15796  | -2.88369 |
| H                       | 0.98043  | -2.39561 | 0.10080  | H                            | 0.25430  | -0.90059 | -1.42090 |
| H                       | 4.15562  | 0.53182  | 0.12956  | H                            | -2.89343 | -3.03960 | 0.62780  |
| H                       | 3.16968  | 1.56481  | 2.13637  | H                            | -4.55575 | -1.95338 | -0.81078 |

|    |          |          |          |    |          |          |          |
|----|----------|----------|----------|----|----------|----------|----------|
| C  | 0.92997  | 0.77432  | 3.54453  | C  | -4.15936 | -0.21418 | -2.90048 |
| H  | 1.34185  | 0.35676  | 4.46727  | H  | -5.09036 | -0.06660 | -2.35277 |
| H  | 1.12563  | 1.84648  | 3.54493  | H  | -3.80738 | 0.75302  | -3.25854 |
| H  | -0.14713 | 0.61125  | 3.54421  | H  | -4.37882 | -0.83808 | -3.77151 |
| C  | 3.29994  | -1.64660 | -1.28089 | C  | -0.10672 | -2.68413 | 0.58886  |
| H  | 3.78217  | -0.80779 | -1.79177 | H  | 0.65019  | -1.91016 | 0.70703  |
| C  | 4.39109  | -2.66661 | -0.91245 | C  | -0.60940 | -3.07643 | 1.97713  |
| H  | 3.95938  | -3.52648 | -0.39525 | H  | -1.30313 | -3.91999 | 1.93790  |
| H  | 4.88352  | -3.02575 | -1.81743 | H  | 0.23833  | -3.38492 | 2.59112  |
| H  | 5.15154  | -2.22635 | -0.26497 | H  | -1.10253 | -2.24067 | 2.47401  |
| C  | 2.26788  | -2.25028 | -2.23415 | C  | 0.55322  | -3.87675 | -0.12235 |
| H  | 2.75627  | -2.53034 | -3.16829 | H  | 1.36631  | -4.26300 | 0.49344  |
| H  | 1.81329  | -3.15340 | -1.82164 | H  | -0.16605 | -4.68292 | -0.28759 |
| H  | 1.47342  | -1.53954 | -2.46713 | H  | 0.97409  | -3.58686 | -1.08606 |
| O  | 1.42553  | 1.51992  | -1.69205 | O  | -1.90435 | 0.17063  | 1.99389  |
| C  | 1.00087  | 2.61476  | -1.20031 | C  | -3.06598 | 0.66472  | 2.14995  |
| O  | 0.82939  | 2.64508  | 0.06021  | O  | -3.86132 | 0.59544  | 1.16103  |
| C  | 0.69237  | 3.79028  | -2.06097 | C  | -3.46514 | 1.32401  | 3.42784  |
| H  | -0.35184 | 3.72676  | -2.37693 | H  | -3.21379 | 2.38592  | 3.36716  |
| H  | 1.32074  | 3.78319  | -2.94954 | H  | -2.92001 | 0.89058  | 4.26455  |
| H  | 0.82601  | 4.71417  | -1.50155 | H  | -4.53917 | 1.23516  | 3.58200  |
| Sb | -2.51963 | -0.39707 | -0.09916 | Sb | 3.31909  | -0.04342 | -0.00322 |
| F  | -0.81924 | 0.50642  | -0.50269 | F  | 1.46005  | 0.19677  | 0.39017  |
| F  | -2.72988 | -0.68174 | -1.95638 | F  | 3.13473  | -1.90499 | 0.33715  |
| F  | -4.15387 | -1.26575 | 0.29806  | F  | 5.16224  | -0.26993 | -0.40864 |
| F  | -2.16719 | -0.07094 | 1.73871  | F  | 3.44625  | 1.83080  | -0.34754 |
| F  | -1.54228 | -2.02201 | 0.03526  | F  | 2.84957  | -0.34324 | -1.82924 |
| F  | -3.35841 | 1.29104  | -0.25153 | F  | 3.72333  | 0.25944  | 1.83001  |
|    |          |          |          | C  | -0.67884 | 2.30023  | -0.23911 |
|    |          |          |          | O  | -1.85308 | 1.85240  | -0.24200 |
|    |          |          |          | N  | -0.39659 | 3.58497  | -0.35082 |
|    |          |          |          | C  | -1.43840 | 4.59614  | -0.47777 |
|    |          |          |          | H  | -2.41097 | 4.11447  | -0.47347 |
|    |          |          |          | H  | -1.37131 | 5.29786  | 0.35587  |
|    |          |          |          | H  | -1.30332 | 5.14574  | -1.41122 |
|    |          |          |          | H  | 0.17925  | 1.63519  | -0.13625 |
|    |          |          |          | C  | 0.98655  | 4.04943  | -0.33998 |
|    |          |          |          | H  | 1.19591  | 4.59602  | -1.26150 |
|    |          |          |          | H  | 1.14396  | 4.72016  | 0.50705  |
|    |          |          |          | H  | 1.66859  | 3.20544  | -0.26358 |

| TS1a-DMF(DMF solvent) |         |          |          | INT1(DMF solvent) |          |          |          |
|-----------------------|---------|----------|----------|-------------------|----------|----------|----------|
| Ru                    | 3.26239 | -0.23906 | -0.19597 | Ru                | -3.14336 | -0.04035 | 0.12254  |
| C                     | 2.66796 | -1.80634 | -1.71445 | C                 | -3.72252 | 1.00544  | -1.75563 |
| C                     | 3.29775 | -0.73330 | -2.36092 | C                 | -2.51176 | 0.31829  | -1.96779 |
| C                     | 4.55531 | -0.24429 | -1.91088 | C                 | -2.39534 | -1.07006 | -1.67414 |
| C                     | 5.23545 | -0.84645 | -0.81741 | C                 | -3.48249 | -1.80757 | -1.16857 |
| C                     | 4.60061 | -1.95742 | -0.17762 | C                 | -4.71127 | -1.10455 | -0.95983 |
| C                     | 3.33289 | -2.39347 | -0.58902 | C                 | -4.83092 | 0.26591  | -1.23872 |
| H                     | 2.77487 | -0.20049 | -3.14427 | H                 | -1.63484 | 0.86782  | -2.28126 |
| H                     | 4.95439 | 0.65031  | -2.36589 | H                 | -1.42222 | -1.53323 | -1.76226 |
| H                     | 5.04415 | -2.37969 | 0.71463  | H                 | -5.53850 | -1.61949 | -0.48794 |
| H                     | 2.81843 | -3.14578 | -0.00679 | H                 | -5.75066 | 0.78018  | -0.99344 |
| C                     | 1.32781 | -2.30211 | -2.15131 | C                 | -3.84687 | 2.47438  | -2.00774 |
| H                     | 1.46783 | -3.11111 | -2.87518 | H                 | -4.31693 | 2.63282  | -2.98293 |
| H                     | 0.75758 | -2.69590 | -1.31344 | H                 | -4.47569 | 2.94996  | -1.25464 |
| H                     | 0.75059 | -1.51385 | -2.63240 | H                 | -2.87314 | 2.95969  | -2.01396 |
| C                     | 6.56507 | -0.35008 | -0.30438 | C                 | -3.38572 | -3.27324 | -0.81052 |
| H                     | 6.56813 | -0.54190 | 0.77198  | H                 | -4.20002 | -3.47411 | -0.10793 |
| C                     | 7.68933 | -1.18086 | -0.94448 | C                 | -3.62559 | -4.12060 | -2.06973 |
| H                     | 7.71761 | -1.02932 | -2.02637 | H                 | -2.82990 | -3.96296 | -2.80198 |
| H                     | 8.65485 | -0.87806 | -0.53507 | H                 | -3.64184 | -5.18060 | -1.80982 |
| H                     | 7.56116 | -2.24831 | -0.75452 | H                 | -4.57731 | -3.87387 | -2.54443 |
| C                     | 6.79169 | 1.14662  | -0.51343 | C                 | -2.07311 | -3.64843 | -0.12077 |
| H                     | 7.71491 | 1.44737  | -0.01539 | H                 | -2.10705 | -4.69407 | 0.18924  |
| H                     | 6.89867 | 1.39823  | -1.57119 | H                 | -1.21438 | -3.53454 | -0.78597 |
| H                     | 5.97282 | 1.73199  | -0.09524 | H                 | -1.90799 | -3.03393 | 0.76522  |
| O                     | 4.09156 | 0.59249  | 1.59703  | O                 | -3.74760 | -0.68413 | 2.08780  |
| C                     | 3.35611 | 0.08134  | 2.51689  | C                 | -3.82347 | 0.51799  | 2.49049  |
| O                     | 2.41972 | -0.68065 | 2.21719  | O                 | -3.65285 | 1.43071  | 1.62079  |
| C                     | 3.68274 | 0.42362  | 3.94665  | C                 | -4.06546 | 0.84618  | 3.92575  |
| H                     | 2.79716 | 0.32346  | 4.57141  | H                 | -3.09977 | 0.96610  | 4.42332  |
| H                     | 4.09175 | 1.42999  | 4.02369  | H                 | -4.60715 | 0.03870  | 4.41483  |
| H                     | 4.44006 | -0.27546 | 4.31047  | H                 | -4.61225 | 1.78363  | 4.01403  |
| C                     | 2.29047 | 2.54014  | 0.32864  | Sb                | 4.76335  | -0.37124 | -0.02722 |
| O                     | 2.87675 | 1.84337  | -0.52635 | F                 | 5.51686  | 1.19162  | -0.80355 |
| H                     | 1.90317 | 2.10353  | 1.24936  | F                 | 3.63831  | 0.73692  | 1.07694  |
| N                     | 2.08541 | 3.84076  | 0.19091  | F                 | 3.95800  | -1.90297 | 0.77351  |
| C                     | 2.53158 | 4.56826  | -0.99055 | F                 | 5.84402  | -1.48316 | -1.12584 |
| H                     | 3.00433 | 3.87663  | -1.68055 | F                 | 3.38916  | -0.36582 | -1.35134 |
| H                     | 1.67566 | 5.04310  | -1.47424 | F                 | 6.09362  | -0.35421 | 1.32867  |
| H                     | 3.24449 | 5.34212  | -0.69920 | C                 | 0.00874  | 1.71794  | 0.09508  |

|                                     |          |          |          |                                                    |          |          |          |
|-------------------------------------|----------|----------|----------|----------------------------------------------------|----------|----------|----------|
| C                                   | 1.40620  | 4.61075  | 1.22345  | C                                                  | 1.04706  | 1.86636  | -0.82736 |
| H                                   | 0.50717  | 5.07631  | 0.81424  | C                                                  | 1.18005  | 3.05864  | -1.52796 |
| H                                   | 1.12617  | 3.95779  | 2.04804  | C                                                  | 0.29550  | 4.10721  | -1.29946 |
| H                                   | 2.06616  | 5.39503  | 1.59951  | C                                                  | -0.73350 | 3.96146  | -0.37339 |
| Sb                                  | -5.77061 | 0.30649  | -0.15692 | C                                                  | -0.88664 | 2.76681  | 0.31572  |
| F                                   | -4.10159 | 0.58484  | 0.75164  | H                                                  | 1.73775  | 1.05437  | -1.01332 |
| F                                   | -4.82118 | -0.52614 | -1.58995 | H                                                  | 1.97743  | 3.16755  | -2.25340 |
| F                                   | -7.42308 | 0.03944  | -1.06173 | H                                                  | 0.40787  | 5.03886  | -1.84186 |
| F                                   | -6.66361 | 1.14353  | 1.30069  | H                                                  | -1.41704 | 4.78160  | -0.18744 |
| F                                   | -5.94786 | -1.38120 | 0.70077  | H                                                  | -1.68510 | 2.64768  | 1.03593  |
| F                                   | -5.55112 | 1.99371  | -1.01116 | C                                                  | -0.15132 | 0.46066  | 0.86750  |
| C                                   | -0.99838 | -1.52572 | 0.42242  | O                                                  | -1.27802 | -0.04198 | 1.13426  |
| C                                   | -2.20718 | -2.03114 | -0.06445 | N                                                  | 0.94669  | -0.13158 | 1.30981  |
| C                                   | -2.61602 | -3.31258 | 0.28387  | H                                                  | 1.83977  | 0.33472  | 1.19056  |
| C                                   | -1.82690 | -4.09621 | 1.11873  | C                                                  | 0.93898  | -1.40009 | 2.02298  |
| C                                   | -0.62278 | -3.59517 | 1.60476  | H                                                  | 0.21565  | -2.07297 | 1.56766  |
| C                                   | -0.20468 | -2.31840 | 1.25375  | H                                                  | 1.93545  | -1.82901 | 1.95369  |
| H                                   | -2.82528 | -1.44803 | -0.73400 | H                                                  | 0.66970  | -1.25990 | 3.07198  |
| H                                   | -3.55007 | -3.70040 | -0.10486 |                                                    |          |          |          |
| H                                   | -2.14877 | -5.09535 | 1.38952  |                                                    |          |          |          |
| H                                   | -0.00797 | -4.20217 | 2.25957  |                                                    |          |          |          |
| H                                   | 0.72740  | -1.91637 | 1.62436  |                                                    |          |          |          |
| C                                   | -0.50932 | -0.16136 | 0.05226  |                                                    |          |          |          |
| O                                   | 0.69693  | 0.11800  | -0.02361 |                                                    |          |          |          |
| N                                   | -1.45899 | 0.75112  | -0.21217 |                                                    |          |          |          |
| H                                   | -2.41934 | 0.54842  | 0.03396  |                                                    |          |          |          |
| C                                   | -1.14639 | 2.10874  | -0.60958 |                                                    |          |          |          |
| H                                   | -0.83153 | 2.71765  | 0.24217  |                                                    |          |          |          |
| H                                   | -0.34721 | 2.10695  | -1.34927 |                                                    |          |          |          |
| H                                   | -2.03796 | 2.55734  | -1.04434 |                                                    |          |          |          |
| <b>1a(CH<sub>3</sub>CN solvent)</b> |          |          |          | <b>CH<sub>3</sub>CN (CH<sub>3</sub>CN solvent)</b> |          |          |          |
| C                                   | 0.24432  | 0.10783  | -0.04124 | C                                                  | 0.00000  | 0.00000  | 0.27994  |
| C                                   | 0.79307  | -1.16669 | -0.20180 | N                                                  | 0.00000  | 0.00000  | 1.42990  |
| C                                   | 2.16992  | -1.34935 | -0.15286 | C                                                  | 0.00000  | 0.00000  | -1.17459 |
| C                                   | 3.01089  | -0.26278 | 0.06267  | H                                                  | 0.00000  | 1.02517  | -1.54712 |
| C                                   | 2.47077  | 1.01051  | 0.21929  | H                                                  | -0.88782 | -0.51258 | -1.54712 |
| C                                   | 1.09649  | 1.19529  | 0.15931  | H                                                  | 0.88782  | -0.51258 | -1.54712 |
| H                                   | 0.15414  | -2.02088 | -0.39269 |                                                    |          |          |          |
| H                                   | 2.58566  | -2.34044 | -0.28942 |                                                    |          |          |          |
| H                                   | 4.08403  | -0.40686 | 0.10322  |                                                    |          |          |          |
| H                                   | 3.12252  | 1.86002  | 0.38532  |                                                    |          |          |          |

|                                      |          |          |          |                                           |          |          |          |
|--------------------------------------|----------|----------|----------|-------------------------------------------|----------|----------|----------|
| H                                    | 0.66599  | 2.18204  | 0.26825  |                                           |          |          |          |
| C                                    | -1.23056 | 0.37371  | -0.10296 |                                           |          |          |          |
| O                                    | -1.67164 | 1.48253  | -0.41422 |                                           |          |          |          |
| N                                    | -2.04914 | -0.65784 | 0.19560  |                                           |          |          |          |
| H                                    | -1.65778 | -1.50742 | 0.57630  |                                           |          |          |          |
| C                                    | -3.49389 | -0.50822 | 0.18412  |                                           |          |          |          |
| H                                    | -3.83285 | 0.17086  | 0.97026  |                                           |          |          |          |
| H                                    | -3.82443 | -0.10874 | -0.77457 |                                           |          |          |          |
| H                                    | -3.94629 | -1.48575 | 0.33876  |                                           |          |          |          |
| <b>CAT(CH<sub>3</sub>CN solvent)</b> |          |          |          | <b>COMI-CCN(CH<sub>3</sub>CN solvent)</b> |          |          |          |
| Ru                                   | 1.24105  | 0.54966  | 0.20506  | Ru                                        | 2.33545  | 0.04711  | 0.16477  |
| C                                    | 1.56578  | 0.11123  | 2.36240  | C                                         | 2.99512  | -1.14057 | 1.91710  |
| C                                    | 0.97738  | -1.00712 | 1.74453  | C                                         | 1.61094  | -0.89607 | 2.03385  |
| C                                    | 1.53644  | -1.60453 | 0.58036  | C                                         | 0.72496  | -1.22570 | 0.97350  |
| C                                    | 2.70695  | -1.08906 | -0.00884 | C                                         | 1.18322  | -1.81957 | -0.22166 |
| C                                    | 3.30573  | 0.05781  | 0.60317  | C                                         | 2.58366  | -2.08777 | -0.31793 |
| C                                    | 2.74582  | 0.64339  | 1.75780  | C                                         | 3.47002  | -1.76474 | 0.72202  |
| H                                    | 0.02104  | -1.36551 | 2.09990  | H                                         | 1.23190  | -0.36906 | 2.89936  |
| H                                    | 0.98026  | -2.39555 | 0.10057  | H                                         | -0.31277 | -0.93139 | 1.04653  |
| H                                    | 4.15556  | 0.53176  | 0.12991  | H                                         | 2.99736  | -2.46568 | -1.24237 |
| H                                    | 3.16941  | 1.56464  | 2.13668  | H                                         | 4.53213  | -1.91732 | 0.58413  |
| C                                    | 0.92948  | 0.77413  | 3.54450  | C                                         | 3.95567  | -0.71917 | 2.98300  |
| H                                    | 1.34116  | 0.35650  | 4.46730  | H                                         | 4.87434  | -0.32518 | 2.54803  |
| H                                    | 1.12519  | 1.84628  | 3.54499  | H                                         | 3.51822  | 0.03766  | 3.63266  |
| H                                    | -0.14763 | 0.61114  | 3.54397  | H                                         | 4.21999  | -1.58552 | 3.59620  |
| C                                    | 3.29993  | -1.64648 | -1.28085 | C                                         | 0.20458  | -2.12016 | -1.33415 |
| H                                    | 3.78211  | -0.80760 | -1.79165 | H                                         | -0.55451 | -1.33950 | -1.28719 |
| C                                    | 4.39114  | -2.66643 | -0.91244 | C                                         | 0.82523  | -2.08756 | -2.73047 |
| H                                    | 3.95948  | -3.52639 | -0.39533 | H                                         | 1.52821  | -2.90969 | -2.88625 |
| H                                    | 4.88364  | -3.02547 | -1.81743 | H                                         | 0.03767  | -2.19216 | -3.47830 |
| H                                    | 5.15153  | -2.22618 | -0.26490 | H                                         | 1.34663  | -1.14766 | -2.91789 |
| C                                    | 2.26794  | -2.25015 | -2.23419 | C                                         | -0.48222 | -3.46669 | -1.06043 |
| H                                    | 2.75640  | -2.53013 | -3.16832 | H                                         | -1.23224 | -3.66152 | -1.82853 |
| H                                    | 1.81338  | -3.15332 | -1.82176 | H                                         | 0.24093  | -4.28638 | -1.07403 |
| H                                    | 1.47346  | -1.53944 | -2.46717 | H                                         | -0.98690 | -3.46823 | -0.09318 |
| O                                    | 1.42572  | 1.52001  | -1.69192 | O                                         | 2.99734  | 0.81199  | -1.73290 |
| C                                    | 1.00093  | 2.61481  | -1.20017 | C                                         | 3.83676  | 1.58064  | -1.16484 |
| O                                    | 0.82942  | 2.64508  | 0.06034  | O                                         | 3.93856  | 1.48747  | 0.09896  |
| C                                    | 0.69232  | 3.79031  | -2.06082 | C                                         | 4.63201  | 2.57491  | -1.94231 |
| H                                    | -0.35189 | 3.72667  | -2.37675 | H                                         | 4.05964  | 3.50366  | -2.00963 |
| H                                    | 1.32067  | 3.78327  | -2.94940 | H                                         | 4.81185  | 2.21104  | -2.95244 |

|                                          |          |          |          |                                           |          |          |          |
|------------------------------------------|----------|----------|----------|-------------------------------------------|----------|----------|----------|
| H                                        | 0.82587  | 4.71420  | -1.50139 | H                                         | 5.57258  | 2.78767  | -1.43746 |
| Sb                                       | -2.51955 | -0.39707 | -0.09925 | Sb                                        | -3.34427 | 0.15142  | 0.08271  |
| F                                        | -0.81913 | 0.50647  | -0.50287 | F                                         | -1.67008 | 0.50089  | -0.76561 |
| F                                        | -2.72986 | -0.68173 | -1.95644 | F                                         | -3.43618 | -1.54357 | -0.77514 |
| F                                        | -4.15368 | -1.26583 | 0.29813  | F                                         | -5.00119 | -0.17002 | 0.95792  |
| F                                        | -2.16688 | -0.07101 | 1.73862  | F                                         | -3.20943 | 1.84797  | 0.95392  |
| F                                        | -1.54206 | -2.02196 | 0.03510  | F                                         | -2.40810 | -0.65280 | 1.54657  |
| F                                        | -3.35833 | 1.29103  | -0.25148 | F                                         | -4.24204 | 0.96575  | -1.38535 |
|                                          |          |          |          | C                                         | 0.32634  | 2.54780  | 0.20154  |
|                                          |          |          |          | N                                         | 1.10434  | 1.70902  | 0.17368  |
|                                          |          |          |          | C                                         | -0.67177 | 3.59318  | 0.23582  |
|                                          |          |          |          | H                                         | -0.74980 | 4.05483  | -0.74978 |
|                                          |          |          |          | H                                         | -1.63200 | 3.15321  | 0.51036  |
|                                          |          |          |          | H                                         | -0.38648 | 4.35176  | 0.96633  |
| <b>TS1-CCN(CH<sub>3</sub>CN solvent)</b> |          |          |          | <b>TS1a-CCN(CH<sub>3</sub>CN solvent)</b> |          |          |          |
| Ru                                       | 3.15467  | -0.11176 | 0.25470  | Ru                                        | -3.36952 | -0.05813 | -0.12915 |
| C                                        | 4.44074  | -0.32738 | 2.01789  | C                                         | -3.06528 | 1.44921  | -1.80007 |
| C                                        | 3.38168  | -1.25810 | 2.10012  | C                                         | -3.62784 | 0.27954  | -2.32466 |
| C                                        | 3.11526  | -2.16928 | 1.04289  | C                                         | -4.78421 | -0.30186 | -1.73102 |
| C                                        | 3.88445  | -2.17124 | -0.13941 | C                                         | -5.43799 | 0.30425  | -0.62360 |
| C                                        | 4.92840  | -1.20624 | -0.24702 | C                                         | -4.88059 | 1.52346  | -0.12182 |
| C                                        | 5.20589  | -0.30826 | 0.81670  | C                                         | -3.70365 | 2.05159  | -0.66433 |
| H                                        | 2.69578  | -1.20459 | 2.93323  | H                                         | -3.12052 | -0.24878 | -3.12087 |
| H                                        | 2.24144  | -2.80375 | 1.10434  | H                                         | -5.12450 | -1.26042 | -2.09512 |
| H                                        | 5.47402  | -1.09587 | -1.17179 | H                                         | -5.29478 | 1.96469  | 0.77546  |
| H                                        | 5.94967  | 0.46348  | 0.67378  | H                                         | -3.23029 | 2.89379  | -0.17866 |
| C                                        | 4.67491  | 0.68296  | 3.09523  | C                                         | -1.81333 | 2.03503  | -2.36544 |
| H                                        | 5.08321  | 1.60565  | 2.68389  | H                                         | -2.08063 | 2.81630  | -3.08394 |
| H                                        | 3.74892  | 0.91133  | 3.62151  | H                                         | -1.20242 | 2.48541  | -1.58667 |
| H                                        | 5.39258  | 0.28710  | 3.81943  | H                                         | -1.22415 | 1.28027  | -2.88309 |
| C                                        | 3.55097  | -3.13200 | -1.25662 | C                                         | -6.66321 | -0.28446 | 0.03128  |
| H                                        | 2.48677  | -3.36227 | -1.15814 | H                                         | -6.61141 | -0.00021 | 1.08573  |
| C                                        | 3.78832  | -2.57046 | -2.65922 | C                                         | -7.91736 | 0.35978  | -0.58158 |
| H                                        | 4.85235  | -2.42642 | -2.86135 | H                                         | -8.00846 | 0.10443  | -1.64020 |
| H                                        | 3.41309  | -3.27790 | -3.40056 | H                                         | -8.80980 | -0.00191 | -0.06792 |
| H                                        | 3.27956  | -1.61754 | -2.80189 | H                                         | -7.89525 | 1.44790  | -0.49563 |
| C                                        | 4.34313  | -4.43201 | -1.03745 | C                                         | -6.73080 | -1.80996 | -0.03608 |
| H                                        | 4.07379  | -5.16428 | -1.80077 | H                                         | -7.58505 | -2.16123 | 0.54472  |
| H                                        | 5.41815  | -4.24915 | -1.10901 | H                                         | -6.86663 | -2.16811 | -1.05914 |
| H                                        | 4.13679  | -4.86896 | -0.05877 | H                                         | -5.83031 | -2.26378 | 0.37821  |
| O                                        | 3.02856  | 0.78780  | -1.81933 | O                                         | -3.93592 | -0.71186 | 1.82054  |



|    |          |          |          |    |          |          |          |
|----|----------|----------|----------|----|----------|----------|----------|
| C  | 3.24825  | 1.93985  | -1.34858 | C  | -3.13897 | -0.07174 | 2.59994  |
| O  | 3.46803  | 2.03662  | -0.10270 | O  | -2.32371 | 0.74353  | 2.14002  |
| C  | 3.22338  | 3.15180  | -2.22707 | C  | -3.22756 | -0.37334 | 4.07318  |
| H  | 2.18778  | 3.47781  | -2.34242 | H  | -2.82767 | 0.45651  | 4.65258  |
| H  | 3.61822  | 2.91050  | -3.21306 | H  | -2.63088 | -1.26355 | 4.28636  |
| H  | 3.79035  | 3.96494  | -1.77814 | H  | -4.25531 | -0.58199 | 4.36737  |
| Sb | -5.01751 | -0.59697 | 0.08110  | Sb | 5.67422  | -0.47095 | -0.05321 |
| F  | -5.20654 | 0.25126  | -1.61054 | F  | 3.98225  | -0.69080 | 0.82785  |
| F  | -3.33366 | 0.28707  | 0.31095  | F  | 4.77545  | 0.34575  | -1.52691 |
| F  | -4.76696 | -1.43753 | 1.77038  | F  | 7.34776  | -0.25189 | -0.93159 |
| F  | -6.68149 | -1.48718 | -0.14889 | F  | 6.52454  | -1.29380 | 1.43729  |
| F  | -5.87425 | 0.87814  | 0.92269  | F  | 5.86795  | 1.23039  | 0.77410  |
| F  | -4.09686 | -2.04392 | -0.76157 | F  | 5.43811  | -2.17261 | -0.87314 |
| C  | 0.01501  | -1.17842 | -1.40696 | C  | 0.89145  | 1.55866  | 0.13576  |
| N  | 0.95504  | -0.79174 | -0.87405 | C  | 2.13246  | 1.95812  | -0.36605 |
| C  | -1.17964 | -1.65906 | -2.07550 | C  | 2.55699  | 3.27207  | -0.20727 |
| H  | -1.43657 | -0.98615 | -2.89493 | C  | 1.75185  | 4.19215  | 0.45486  |
| H  | -0.99774 | -2.65534 | -2.48133 | C  | 0.51680  | 3.79509  | 0.95952  |
| H  | -2.01826 | -1.70608 | -1.37955 | C  | 0.08281  | 2.48636  | 0.79570  |
| C  | -0.08170 | 2.42608  | 0.35203  | H  | 2.76807  | 1.26320  | -0.89852 |
| C  | -1.16426 | 2.49992  | -0.52891 | H  | 3.51675  | 3.57634  | -0.60763 |
| C  | -1.39593 | 3.66348  | -1.25087 | H  | 2.08560  | 5.21597  | 0.57858  |
| C  | -0.56245 | 4.76519  | -1.08694 | H  | -0.10934 | 4.50849  | 1.48298  |
| C  | 0.51169  | 4.69777  | -0.20504 | H  | -0.86882 | 2.16129  | 1.19185  |
| C  | 0.75976  | 3.52904  | 0.50145  | C  | 0.38407  | 0.16275  | -0.04236 |
| H  | -1.82872 | 1.65594  | -0.65760 | O  | -0.81940 | -0.08923 | -0.19502 |
| H  | -2.22972 | 3.71019  | -1.94122 | N  | 1.31001  | -0.80905 | -0.04831 |
| H  | -0.75040 | 5.67490  | -1.64541 | H  | 2.26821  | -0.59462 | 0.19551  |
| H  | 1.16077  | 5.55542  | -0.07298 | C  | 0.96238  | -2.20358 | -0.23323 |
| H  | 1.60306  | 3.45794  | 1.17297  | H  | 0.37076  | -2.58173 | 0.60432  |
| C  | 0.20899  | 1.20286  | 1.15417  | H  | 0.38648  | -2.33394 | -1.15043 |
| O  | 1.37181  | 0.89811  | 1.49747  | H  | 1.88246  | -2.78009 | -0.30461 |
| N  | -0.83217 | 0.46030  | 1.52919  | C  | -2.54822 | -3.18676 | -0.32018 |
| H  | -1.76338 | 0.70764  | 1.22362  | N  | -2.81310 | -2.07773 | -0.22991 |
| C  | -0.68206 | -0.77957 | 2.26914  | C  | -2.20002 | -4.58885 | -0.42604 |
| H  | -0.06666 | -1.48984 | 1.71565  | H  | -1.53543 | -4.74201 | -1.27789 |
| H  | -0.21410 | -0.59849 | 3.23780  | H  | -3.10429 | -5.18261 | -0.56814 |
| H  | -1.67107 | -1.20533 | 2.42311  | H  | -1.69775 | -4.91369 | 0.48644  |

| <b>TS1b-CCN(CH<sub>3</sub>CN solvent)</b> |          |          |          | <b>INT1(CH<sub>3</sub>CN solvent)</b> |          |          |          |
|-------------------------------------------|----------|----------|----------|---------------------------------------|----------|----------|----------|
| Ru                                        | 3.00104  | -0.08696 | -0.14166 | Ru                                    | -3.13779 | -0.03405 | 0.11778  |
| C                                         | 2.59038  | -1.18293 | -2.02214 | C                                     | -3.68331 | 1.00713  | -1.77278 |
| C                                         | 3.39354  | -0.06007 | -2.33119 | C                                     | -2.48341 | 0.29728  | -1.96986 |
| C                                         | 4.59356  | 0.17487  | -1.62495 | C                                     | -2.39293 | -1.09075 | -1.66435 |
| C                                         | 5.06658  | -0.70474 | -0.61559 | C                                     | -3.49698 | -1.80503 | -1.16223 |
| C                                         | 4.25656  | -1.83255 | -0.32183 | C                                     | -4.71539 | -1.07953 | -0.96931 |
| C                                         | 3.03806  | -2.07151 | -1.00296 | C                                     | -4.80852 | 0.29055  | -1.25929 |
| H                                         | 3.03645  | 0.67876  | -3.03478 | H                                     | -1.59451 | 0.82928  | -2.27986 |
| H                                         | 5.10659  | 1.11057  | -1.79204 | H                                     | -1.42749 | -1.57157 | -1.74072 |
| H                                         | 4.52067  | -2.46996 | 0.51208  | H                                     | -5.55545 | -1.57665 | -0.50126 |
| H                                         | 2.41366  | -2.90022 | -0.70187 | H                                     | -5.72078 | 0.82270  | -1.02471 |
| C                                         | 1.28807  | -1.40555 | -2.72159 | C                                     | -3.77992 | 2.47620  | -2.03627 |
| H                                         | 1.47510  | -1.94826 | -3.65302 | H                                     | -4.24630 | 2.63648  | -3.01284 |
| H                                         | 0.60458  | -1.99796 | -2.11761 | H                                     | -4.39995 | 2.96891  | -1.28691 |
| H                                         | 0.81155  | -0.45928 | -2.97701 | H                                     | -2.79729 | 2.94308  | -2.04479 |
| C                                         | 6.35184  | -0.47767 | 0.14764  | C                                     | -3.42978 | -3.26947 | -0.79279 |
| H                                         | 6.17565  | -0.84126 | 1.16462  | H                                     | -4.25171 | -3.44957 | -0.09354 |
| C                                         | 7.46302  | -1.33572 | -0.47972 | C                                     | -3.67957 | -4.12065 | -2.04768 |
| H                                         | 7.66433  | -1.01914 | -1.50625 | H                                     | -2.87670 | -3.98411 | -2.77627 |
| H                                         | 8.38589  | -1.23023 | 0.09355  | H                                     | -3.71859 | -5.17813 | -1.78039 |
| H                                         | 7.19450  | -2.39375 | -0.49810 | H                                     | -4.62336 | -3.85796 | -2.52944 |
| C                                         | 6.77041  | 0.98936  | 0.23649  | C                                     | -2.12855 | -3.66567 | -0.09316 |
| H                                         | 7.64485  | 1.07863  | 0.88327  | H                                     | -2.18400 | -4.70895 | 0.22140  |
| H                                         | 7.05093  | 1.38859  | -0.74142 | H                                     | -1.26398 | -3.57099 | -0.75373 |
| H                                         | 5.97084  | 1.60097  | 0.65383  | H                                     | -1.95707 | -3.05041 | 0.79114  |
| O                                         | 3.78698  | 1.43440  | 1.90239  | O                                     | -3.75327 | -0.66841 | 2.08258  |
| C                                         | 3.24984  | 0.51386  | 2.53461  | C                                     | -3.82771 | 0.53558  | 2.47995  |
| O                                         | 2.78747  | -0.52096 | 1.92386  | O                                     | -3.65039 | 1.44422  | 1.60735  |
| C                                         | 3.08951  | 0.54553  | 4.03298  | C                                     | -4.07555 | 0.87015  | 3.91276  |
| H                                         | 3.35920  | -0.41844 | 4.46507  | H                                     | -3.11178 | 0.98002  | 4.41626  |
| H                                         | 2.04096  | 0.73205  | 4.27578  | H                                     | -4.62919 | 0.06979  | 4.40010  |
| H                                         | 3.70019  | 1.33473  | 4.46574  | H                                     | -4.61238 | 1.81374  | 3.99519  |
| Sb                                        | -5.52852 | 0.31175  | -0.03666 | Sb                                    | 4.75954  | -0.38088 | -0.02862 |
| F                                         | -3.84304 | 0.54913  | 0.85578  | F                                     | 5.51391  | 1.18111  | -0.80581 |
| F                                         | -4.61471 | -0.50452 | -1.50045 | F                                     | 3.63716  | 0.72936  | 1.07638  |
| F                                         | -7.19623 | 0.08048  | -0.92172 | F                                     | 3.95198  | -1.91128 | 0.77260  |
| F                                         | -6.38911 | 1.13353  | 1.44740  | F                                     | 5.83837  | -1.49411 | -1.12768 |
| F                                         | -5.70851 | -1.38686 | 0.79726  | F                                     | 3.38444  | -0.37431 | -1.35198 |
| F                                         | -5.29446 | 2.01192  | -0.85923 | F                                     | 6.09039  | -0.36536 | 1.32671  |
| C                                         | -0.60998 | -1.29149 | 0.30185  | C                                     | 0.01666  | 1.72123  | 0.10300  |

|   |          |          |          |   |          |          |          |
|---|----------|----------|----------|---|----------|----------|----------|
| C | -1.76007 | -1.75044 | -0.34688 | C | 1.05448  | 1.86800  | -0.82023 |
| C | -2.10790 | -3.09266 | -0.27339 | C | 1.19225  | 3.06216  | -1.51665 |
| C | -1.32024 | -3.97996 | 0.45229  | C | 0.31335  | 4.11437  | -1.28261 |
| C | -0.18296 | -3.52140 | 1.11015  | C | -0.71504 | 3.97018  | -0.35556 |
| C | 0.17854  | -2.18311 | 1.03195  | C | -0.87331 | 2.77352  | 0.32892  |
| H | -2.37829 | -1.07728 | -0.92556 | H | 1.74098  | 1.05334  | -1.00985 |
| H | -2.99372 | -3.44435 | -0.78832 | H | 1.98916  | 3.16976  | -2.24266 |
| H | -1.59467 | -5.02694 | 0.50908  | H | 0.42954  | 5.04742  | -1.82154 |
| H | 0.42368  | -4.20899 | 1.68774  | H | -1.39462 | 4.79259  | -0.16587 |
| H | 1.05475  | -1.81739 | 1.54938  | H | -1.67197 | 2.65497  | 1.04891  |
| C | -0.21517 | 0.13956  | 0.22153  | C | -0.14846 | 0.46244  | 0.87171  |
| O | 0.97406  | 0.53629  | 0.16143  | O | -1.27745 | -0.03561 | 1.13727  |
| N | -1.19152 | 1.04046  | 0.21793  | N | 0.94695  | -0.13537 | 1.31258  |
| H | -2.14535 | 0.74275  | 0.39304  | H | 1.84193  | 0.32757  | 1.19406  |
| C | -0.93245 | 2.46569  | 0.10208  | C | 0.93406  | -1.40499 | 2.02365  |
| H | -0.39559 | 2.84073  | 0.97544  | H | 0.20558  | -2.07285 | 1.56904  |
| H | -0.33087 | 2.67034  | -0.78310 | H | 1.92795  | -1.83929 | 1.95102  |
| H | -1.88818 | 2.97815  | 0.01924  | H | 0.66826  | -1.26497 | 3.07351  |
| C | 2.87759  | 3.65616  | -0.71394 |   |          |          |          |
| N | 2.90302  | 2.52058  | -0.55095 |   |          |          |          |
| C | 2.84425  | 5.09651  | -0.90322 |   |          |          |          |
| H | 3.79248  | 5.43881  | -1.31980 |   |          |          |          |
| H | 2.67816  | 5.59159  | 0.05455  |   |          |          |          |
| H | 2.03854  | 5.36518  | -1.58762 |   |          |          |          |

**Table S5** Coordinates of the first transition state for **CAT+1a** and **CAT-O+1a**, Computed at B3LYP-D3a+IDSCRF/ TZP-DKH(-dfg) in DCE solvent

| <b>TS1</b> |          |          |          | <b>TS1-N</b> |          |          |          |
|------------|----------|----------|----------|--------------|----------|----------|----------|
| Ru         | 0.57872  | 0.96691  | -0.06623 | Ru           | -0.29181 | -1.68216 | -0.00432 |
| C          | 0.70306  | 0.33264  | -2.20658 | C            | -0.92010 | -3.04048 | 1.68346  |
| C          | -0.17959 | 1.43926  | -2.06607 | C            | -1.70782 | -1.87531 | 1.70369  |
| C          | 0.23544  | 2.61920  | -1.40939 | C            | -2.41857 | -1.41820 | 0.56087  |
| C          | 1.54394  | 2.74046  | -0.85686 | C            | -2.36120 | -2.13053 | -0.65506 |
| C          | 2.40542  | 1.61528  | -0.98546 | C            | -1.52403 | -3.28594 | -0.70414 |
| C          | 2.00462  | 0.44177  | -1.67319 | C            | -0.79979 | -3.71532 | 0.43437  |
| H          | -1.21039 | 1.33396  | -2.37182 | H            | -1.72472 | -1.26470 | 2.59627  |
| H          | -0.49505 | 3.39671  | -1.23962 | H            | -2.92804 | -0.46930 | 0.62006  |
| H          | 3.36519  | 1.62902  | -0.48599 | H            | -1.37630 | -3.79530 | -1.64715 |
| H          | 2.65836  | -0.41775 | -1.67486 | H            | -0.10917 | -4.54309 | 0.33949  |
| C          | 0.21808  | -0.94257 | -2.81866 | C            | -0.18738 | -3.54702 | 2.88664  |
| H          | 0.76290  | -1.79961 | -2.42818 | H            | -0.64580 | -4.48415 | 3.21420  |

|    |          |          |          |    |          |          |          |
|----|----------|----------|----------|----|----------|----------|----------|
| H  | -0.84660 | -1.07789 | -2.63800 | H  | 0.85919  | -3.75380 | 2.65875  |
| H  | 0.37595  | -0.89999 | -3.90080 | H  | -0.23948 | -2.84367 | 3.71455  |
| C  | 2.03058  | 3.97325  | -0.13198 | C  | -3.09472 | -1.69814 | -1.90102 |
| H  | 2.68414  | 3.61939  | 0.67170  | H  | -2.56442 | -2.14814 | -2.74527 |
| C  | 2.88041  | 4.81153  | -1.10226 | C  | -4.51201 | -2.29580 | -1.85590 |
| H  | 2.27352  | 5.17310  | -1.93598 | H  | -5.08710 | -1.86874 | -1.03102 |
| H  | 3.29096  | 5.67897  | -0.58261 | H  | -5.03591 | -2.07117 | -2.78647 |
| H  | 3.71263  | 4.23619  | -1.51192 | H  | -4.49186 | -3.38037 | -1.73151 |
| C  | 0.91891  | 4.81620  | 0.49228  | C  | -3.12758 | -0.18700 | -2.11591 |
| H  | 1.36160  | 5.61489  | 1.08952  | H  | -3.64769 | 0.03346  | -3.04969 |
| H  | 0.29869  | 5.29139  | -0.27171 | H  | -3.65892 | 0.33331  | -1.31789 |
| H  | 0.27473  | 4.21990  | 1.13798  | H  | -2.12442 | 0.22819  | -2.18404 |
| O  | -0.43107 | 1.85698  | 1.62723  | O  | 0.44501  | -1.09568 | -1.93314 |
| C  | 0.38033  | 1.33189  | 2.45041  | C  | 1.58149  | -1.61966 | -1.70738 |
| O  | 1.38294  | 0.72859  | 1.96253  | O  | 1.72678  | -2.18567 | -0.57736 |
| C  | 0.14340  | 1.40613  | 3.92227  | C  | 2.67089  | -1.60068 | -2.72089 |
| H  | -0.51817 | 0.58565  | 4.21065  | H  | 2.40759  | -0.94924 | -3.55039 |
| H  | -0.34908 | 2.34296  | 4.17831  | H  | 2.82129  | -2.61722 | -3.09206 |
| H  | 1.08077  | 1.30342  | 4.46559  | H  | 3.60127  | -1.27158 | -2.26163 |
| Sb | -3.25589 | -0.53694 | -0.02663 | F  | -0.42625 | 0.85403  | -0.19617 |
| F  | -1.38372 | -0.26468 | 0.33321  | C  | 3.51797  | 0.27013  | 0.27814  |
| F  | -3.55393 | 1.32427  | 0.21754  | C  | 2.94280  | 1.25859  | -0.52454 |
| F  | -5.10217 | -0.80332 | -0.38906 | C  | 3.66321  | 1.81753  | -1.57341 |
| F  | -2.91357 | -2.38344 | -0.30802 | C  | 4.96199  | 1.39720  | -1.83379 |
| F  | -2.90084 | -0.21895 | -1.87769 | C  | 5.54206  | 0.41214  | -1.03868 |
| F  | -3.51892 | -0.85187 | 1.82536  | C  | 4.82486  | -0.14588 | 0.00873  |
| C  | 3.10536  | -2.52494 | 0.26981  | H  | 1.94188  | 1.62528  | -0.35182 |
| C  | 3.92210  | -3.40774 | -0.44082 | H  | 3.20491  | 2.58604  | -2.18366 |
| C  | 5.29987  | -3.22714 | -0.45869 | H  | 5.52185  | 1.83610  | -2.65136 |
| C  | 5.87332  | -2.16914 | 0.23800  | H  | 6.55502  | 0.08115  | -1.23534 |
| C  | 5.06338  | -1.28510 | 0.94490  | H  | 5.26527  | -0.90914 | 0.63598  |
| C  | 3.68562  | -1.45512 | 0.95484  | C  | 2.82950  | -0.35507 | 1.45094  |
| H  | 3.48760  | -4.22418 | -1.00585 | O  | 3.41544  | -1.12299 | 2.20122  |
| H  | 5.92457  | -3.91081 | -1.02134 | N  | 1.50599  | -0.02764 | 1.67789  |
| H  | 6.94838  | -2.03222 | 0.22738  | H  | 1.16503  | 0.79361  | 1.20345  |
| H  | 5.50827  | -0.46163 | 1.49145  | C  | 1.02527  | -0.12775 | 3.05616  |
| H  | 3.04428  | -0.77311 | 1.49545  | H  | 1.10427  | -1.15242 | 3.40182  |
| C  | 1.61319  | -2.65418 | 0.30757  | H  | 1.61261  | 0.50622  | 3.72506  |
| O  | 0.88211  | -1.66929 | 0.44685  | H  | -0.00854 | 0.20340  | 3.08436  |
| N  | 1.11014  | -3.89818 | 0.16970  | Sb | -1.17617 | 2.59224  | 0.23396  |
| H  | 1.74581  | -4.68225 | 0.21492  | F  | -1.89002 | 4.27853  | 0.72207  |

|              |          |          |          |                |          |          |          |
|--------------|----------|----------|----------|----------------|----------|----------|----------|
| C            | -0.31771 | -4.16969 | 0.20670  | F              | -1.99552 | 2.67966  | -1.46913 |
| H            | -0.86451 | -3.27904 | -0.08523 | F              | -0.30193 | 2.42204  | 1.92120  |
| H            | -0.54905 | -4.98313 | -0.48115 | F              | 0.39721  | 3.38581  | -0.47825 |
| H            | -0.64119 | -4.45719 | 1.21094  | F              | -2.70285 | 1.69741  | 0.94682  |
| <b>TS1-O</b> |          |          |          | <b>TS1-O-N</b> |          |          |          |
| Ru           | -1.00085 | 0.08888  | -0.32430 | Ru             | -0.96670 | 0.41062  | -0.05250 |
| C            | -1.75647 | -1.26017 | -1.96630 | C              | -1.82471 | 1.63075  | -1.71105 |
| C            | -2.07295 | -1.82594 | -0.72261 | C              | -1.81600 | 2.33024  | -0.46336 |
| C            | -2.71449 | -1.05074 | 0.28207  | C              | -0.60664 | 2.53639  | 0.25339  |
| C            | -3.10887 | 0.29336  | 0.03870  | C              | 0.62244  | 2.00624  | -0.20077 |
| C            | -2.83149 | 0.84017  | -1.25387 | C              | 0.57333  | 1.23908  | -1.39055 |
| C            | -2.14070 | 0.09579  | -2.21694 | C              | -0.61116 | 1.07744  | -2.15536 |
| H            | -1.71827 | -2.81236 | -0.46993 | H              | -2.74833 | 2.67364  | -0.03978 |
| H            | -2.82498 | -1.48068 | 1.26393  | H              | -0.66401 | 3.01359  | 1.22123  |
| H            | -3.03737 | 1.88612  | -1.43849 | H              | 1.46686  | 0.72112  | -1.70815 |
| H            | -1.82302 | 0.57472  | -3.13268 | H              | -0.59221 | 0.44791  | -3.03450 |
| C            | -0.99841 | -2.02076 | -3.00806 | C              | -3.10216 | 1.41959  | -2.45832 |
| H            | -0.56980 | -2.93275 | -2.59923 | H              | -3.93733 | 1.32032  | -1.76799 |
| H            | -1.67619 | -2.28917 | -3.82408 | H              | -3.28770 | 2.28304  | -3.10430 |
| H            | -0.19068 | -1.41614 | -3.41859 | H              | -3.04779 | 0.53207  | -3.08787 |
| C            | -3.78553 | 1.14806  | 1.08403  | C              | 1.93351  | 2.18874  | 0.52966  |
| H            | -3.50704 | 2.18209  | 0.86199  | H              | 2.53526  | 1.30440  | 0.31224  |
| C            | -5.30965 | 1.01811  | 0.93592  | C              | 2.66843  | 3.41050  | -0.04390 |
| H            | -5.63430 | -0.00445 | 1.14490  | H              | 2.10384  | 4.32782  | 0.14254  |
| H            | -5.81468 | 1.68325  | 1.63920  | H              | 3.64791  | 3.51493  | 0.42660  |
| H            | -5.63976 | 1.27797  | -0.07199 | H              | 2.81856  | 3.31884  | -1.12135 |
| C            | -3.33545 | 0.84479  | 2.51335  | C              | 1.78925  | 2.29269  | 2.04762  |
| H            | -3.77505 | 1.57247  | 3.19800  | H              | 2.77850  | 2.30540  | 2.50771  |
| H            | -3.65951 | -0.14552 | 2.84144  | H              | 1.28237  | 3.21393  | 2.34550  |
| H            | -2.25016 | 0.90195  | 2.60166  | H              | 1.23235  | 1.44893  | 2.45526  |
| O            | -0.57030 | 2.02611  | 0.48337  | O              | -1.11488 | 0.15159  | 2.00204  |
| C            | 0.18566  | 2.56081  | -0.40399 | C              | -0.79028 | -1.00580 | 2.46089  |
| O            | 0.43511  | 1.98169  | -1.47549 | O              | -0.23268 | -1.88877 | 1.79268  |
| C            | 0.78509  | 3.90734  | -0.08091 | C              | -1.14467 | -1.24537 | 3.91013  |
| H            | 0.14971  | 4.47103  | 0.60056  | H              | -1.01313 | -0.33703 | 4.49693  |
| H            | 0.95703  | 4.47257  | -0.99568 | H              | -0.54420 | -2.05452 | 4.32060  |
| H            | 1.75026  | 3.74711  | 0.40532  | H              | -2.19881 | -1.52744 | 3.96967  |
| O            | 0.18519  | -0.36761 | 1.32678  | O              | -2.49634 | -0.95476 | -0.08996 |
| C            | 0.15893  | -1.44768 | 2.03857  | C              | -3.73632 | -0.73163 | 0.22606  |
| O            | -0.56354 | -2.42917 | 1.85373  | O              | -4.21339 | 0.36087  | 0.52386  |
| C            | 1.12573  | -1.41300 | 3.21101  | C              | -4.58413 | -1.99018 | 0.20824  |

|   |         |          |          |   |          |          |          |
|---|---------|----------|----------|---|----------|----------|----------|
| H | 1.35814 | -2.42424 | 3.54023  | H | -4.44382 | -2.53129 | -0.72834 |
| H | 0.65063 | -0.88134 | 4.03978  | H | -5.63469 | -1.74176 | 0.34127  |
| H | 2.03658 | -0.87524 | 2.95297  | H | -4.26515 | -2.65192 | 1.01637  |
| C | 3.35998 | -0.16661 | -0.21475 | C | 2.81761  | -1.42927 | -0.65022 |
| C | 4.24609 | -0.31932 | 0.85510  | C | 2.81998  | -1.49443 | 0.74528  |
| C | 5.16878 | 0.67562  | 1.15179  | C | 3.89737  | -0.99373 | 1.46675  |
| C | 5.21868 | 1.83222  | 0.38059  | C | 4.97651  | -0.41521 | 0.80785  |
| C | 4.33382 | 1.99346  | -0.68083 | C | 4.98064  | -0.34654 | -0.58208 |
| C | 3.40488 | 1.00378  | -0.97212 | C | 3.91208  | -0.85781 | -1.30476 |
| H | 4.21086 | -1.20317 | 1.48102  | H | 1.99062  | -1.93195 | 1.28280  |
| H | 5.84490 | 0.54998  | 1.98930  | H | 3.89202  | -1.05547 | 2.54850  |
| H | 5.94094 | 2.60695  | 0.61086  | H | 5.81260  | -0.02221 | 1.37456  |
| H | 4.36492 | 2.89546  | -1.28081 | H | 5.81929  | 0.10106  | -1.10238 |
| H | 2.68966 | 1.13159  | -1.77104 | H | 3.90915  | -0.82329 | -2.38640 |
| C | 2.34383 | -1.20099 | -0.58929 | C | 1.70147  | -1.95899 | -1.50557 |
| O | 1.34488 | -0.92399 | -1.26168 | O | 1.87367  | -2.15567 | -2.70991 |
| N | 2.57865 | -2.46215 | -0.17317 | N | 0.49916  | -2.17947 | -0.91825 |
| H | 3.47090 | -2.68642 | 0.24089  | H | 0.38631  | -2.11216 | 0.09306  |
| C | 1.67210 | -3.55255 | -0.49011 | C | -0.53847 | -2.89969 | -1.64148 |
| H | 2.04832 | -4.46056 | -0.02221 | H | -0.75133 | -2.40920 | -2.59080 |
| H | 0.67908 | -3.33827 | -0.09845 | H | -0.22906 | -3.92659 | -1.85370 |
| H | 1.60788 | -3.70952 | -1.56919 | H | -1.43671 | -2.89711 | -1.03193 |

**Table S7** Frequencies of all stationary points for the overall catalytic cycle, computed at B3LYP-D3a+IDSCRF/TZP-DKH(-dfg) level, and some of them computed at B3LYP+IDSCRF/TZP-DKH(-dfg) and B3LYP-D3+IDSCRF/TZP-DKH(-dfg)

| Species       | Frequencies(cm <sup>-1</sup> )                                                                                                                                                                                                                       |
|---------------|------------------------------------------------------------------------------------------------------------------------------------------------------------------------------------------------------------------------------------------------------|
| <b>1a</b>     | 56 85 111 150 220 300 352 411 415 454<br>515 635 684 709 724 818 841 863 952 999<br>1011 1016 1023 1052 1103 1142 1171 1178 1180 1201 1302 1331<br>1355 1442 1467 1478 1493 1523 1552 1616 1640 1670 3011<br>3069 3111 3144 3151 3159 3167 3178 3529 |
| <b>1a</b> D3a | 42 74 107 152 219 299 353 410 415 455<br>514 636 687 709 724 818 843 863 953 999<br>1015 1018 1026 1055 1106 1147 1174 1182 1183 1205 1305 1335<br>1358 1450 1477 1482 1504 1528 1559 1620 1644 1680 3033<br>3092 3133 3160 3167 3175 3184 3194 3573 |
| <b>1a</b> D3  | 48 73 107 151 220 300 355 411 415 457<br>515 637 688 709 723 818 844 863 953 999                                                                                                                                                                     |

|           |     |                                                                                                                                                                                                                                                                                                                                                                                                                                                                                          |
|-----------|-----|------------------------------------------------------------------------------------------------------------------------------------------------------------------------------------------------------------------------------------------------------------------------------------------------------------------------------------------------------------------------------------------------------------------------------------------------------------------------------------------|
|           |     | 1016 1019 1028 1056 1106 1147 1177 1182 1183 1205 1307 1337<br>1359 1450 1477 1483 1505 1528 1561 1621 1645 1681 3035<br>3096 3136 3164 3172 3180 3189 3199 3576                                                                                                                                                                                                                                                                                                                         |
| <b>2a</b> |     | 52 111 147 201 295 302 346 435 570 607<br>642 703 718 779 791 848 955 978 986 1056 1104<br>1116 1142 1230 1329 1373 1385 1413 1426 1478 1492 1501<br>1645 1727 1807 3040 3070 3101 3107 3124 3217 3236                                                                                                                                                                                                                                                                                   |
| <b>2a</b> | D3a | 46 106 143 201 295 301 346 435 570 609<br>642 705 721 780 791 847 957 978 986 1058 1105<br>1117 1144 1232 1329 1373 1387 1414 1428 1479 1492 1501<br>1646 1729 1810 3039 3069 3100 3107 3124 3214 3234                                                                                                                                                                                                                                                                                   |
| <b>2a</b> | D3  | 55 107 145 203 298 303 349 436 571 612<br>641 708 725 781 790 846 958 977 987 1058 1106<br>1118 1146 1233 1329 1373 1388 1414 1429 1480 1493 1501<br>1645 1730 1813 3042 3075 3104 3111 3129 3220 3240                                                                                                                                                                                                                                                                                   |
| <b>3a</b> |     | 23 29 50 54 70 76 101 113 121 150<br>175 190 209 243 287 310 320 348 360 401<br>446 476 499 554 559 583 601 636 647 684<br>695 739 774 778 808 815 820 853 900 948<br>973 979 994 1011 1016 1053 1066 1076 1115 1120 1137<br>1147 1178 1182 1186 1190 1217 1243 1255 1290 1300 1313 1323<br>1364 1378 1380 1409 1421 1449 1461 1475 1478 1481 1493<br>1501 1503 1524 1555 1615 1640 1674 1721 1805 3037 3042<br>3066 3076 3084 3098 3105 3109 3116 3130 3137 3155 3168<br>3178 3189 3555 |
| <b>3a</b> | D3a | 47 49 56 61 84 88 107 119 146 166<br>178 209 233 242 271 306 313 354 388 401<br>443 484 504 524 571 581 606 639 659 681<br>698 736 775 778 800 818 828 858 903 951<br>970 981 998 1013 1021 1059 1071 1082 1117 1134 1141<br>1147 1181 1188 1190 1195 1224 1247 1268 1298 1307 1309 1331<br>1376 1383 1384 1409 1424 1446 1451 1475 1479 1482 1492<br>1501 1503 1525 1561 1616 1642 1678 1720 1806 3018 3036<br>3039 3074 3080 3098 3101 3106 3126 3128 3136 3157 3168<br>3176 3187 3555 |
| <b>3a</b> | D3  | 34 39 45 62 79 82 102 118 145 168<br>177 213 232 243 272 307 314 354 389 399<br>446 484 503 526 572 582 607 638 660 682<br>700 738 775 779 801 820 830 860 901 953<br>971 980 999 1012 1023 1061 1072 1082 1119 1135 1143                                                                                                                                                                                                                                                                |

|                  |                                                                                                                                                                                                                                                                                                                                                                                                                                                                                                                                                |
|------------------|------------------------------------------------------------------------------------------------------------------------------------------------------------------------------------------------------------------------------------------------------------------------------------------------------------------------------------------------------------------------------------------------------------------------------------------------------------------------------------------------------------------------------------------------|
|                  | 1147 1183 1189 1190 1195 1226 1249 1268 1297 1306 1312 1334<br>1375 1381 1385 1409 1427 1447 1451 1475 1478 1484 1492<br>1501 1503 1526 1561 1618 1644 1680 1722 1809 3027 3036<br>3041 3077 3085 3101 3104 3110 3131 3131 3140 3162 3172<br>3181 3192 3557                                                                                                                                                                                                                                                                                    |
| AcOH             | 66 433 544 588 650 868 1003 1069 1197 1345<br>1409 1467 1473 1767 3053 3110 3160 3498                                                                                                                                                                                                                                                                                                                                                                                                                                                          |
| AcOH D3a         | 62 432 544 588 650 869 1004 1069 1198 1345<br>1409 1467 1473 1770 3052 3109 3160 3504                                                                                                                                                                                                                                                                                                                                                                                                                                                          |
| AcOH D3          | 64 433 543 589 651 870 1004 1069 1199 1346<br>1409 1468 1473 1771 3054 3112 3162 3510                                                                                                                                                                                                                                                                                                                                                                                                                                                          |
| <b>CAT-O</b>     | 29 35 45 57 61 62 63 95 105 117<br>130 174 187 196 214 216 234 244 260 269<br>285 297 328 353 391 401 426 446 451 488<br>523 528 577 625 626 646 672 674 690 694<br>815 892 904 915 935 938 962 969 978 983<br>1007 1016 1022 1033 1054 1062 1069 1080 1107 1134 1166<br>1178 1221 1235 1307 1330 1339 1356 1384 1389 1402 1415<br>1417 1422 1425 1448 1465 1466 1471 1477 1485 1486 1492<br>1496 1498 1504 1510 1525 1535 1565 1645 3019 3028 3035<br>3036 3046 3050 3090 3096 3098 3099 3103 3108 3113 3127<br>3139 3145 3176 3193 3222 3236 |
| <b>CAT-O</b> D3a | 30 38 42 50 63 68 80 89 115 119<br>132 174 186 196 215 218 233 245 266 267<br>287 299 330 353 392 404 435 446 452 488<br>524 527 583 624 626 648 673 676 691 696<br>817 895 903 915 936 939 963 971 978 984<br>1010 1017 1022 1033 1056 1062 1069 1081 1111 1135 1169 1180<br>1225 1239 1309 1333 1343 1358 1384 1390 1401 1416 1419<br>1424 1425 1448 1465 1467 1474 1476 1485 1486 1492 1500<br>1500 1503 1512 1525 1535 1567 1648 3019 3026 3035 3036<br>3045 3049 3089 3095 3097 3098 3102 3109 3112 3127 3137<br>3144 3176 3193 3222 3237 |
| <b>pre-CAT</b>   | 19 31 32 43 49 55 70 85 92 94<br>111 117 128 138 145 150 159 160 177 179<br>194 214 225 231 235 238 241 242 250 254<br>263 269 273 281 308 310 350 352 368 371<br>393 394 409 416 443 443 450 450 522 526<br>567 569 643 645 664 666 692 692 814 815                                                                                                                                                                                                                                                                                           |



|                                              |                                                                                                                                                                                                                                                                                                                                                                                                                                                                                                                            |
|----------------------------------------------|----------------------------------------------------------------------------------------------------------------------------------------------------------------------------------------------------------------------------------------------------------------------------------------------------------------------------------------------------------------------------------------------------------------------------------------------------------------------------------------------------------------------------|
|                                              | 893 894 904 914 932 933 939 941 971 972<br>979 982 990 991 1007 1009 1015 1020 1055 1055 1079<br>1081 1107 1108 1136 1136 1164 1166 1181 1185 1221 1221 1236<br>1238 1308 1311 1335 1340 1359 1360 1401 1402 1416 1416<br>1417 1418 1421 1424 1425 1425 1469 1470 1485 1487 1488<br>1489 1491 1492 1496 1497 1503 1504 1511 1511 1527 1533<br>1564 1565 3026 3027 3028 3032 3035 3035 3035 3041 3089<br>3089 3095 3095 3099 3099 3101 3104 3112 3112 3134 3136<br>3186 3189 3193 3195 3197 3207 3208 3218                  |
| <b>Pre-CAT D3a</b>                           | 18 21 41 51 58 64 70 73 83 99<br>107 110 131 143 153 161 169 176 180 186<br>197 201 211 228 244 247 252 252 255 257<br>261 263 269 273 277 302 335 339 348 358<br>407 418 428 440 453 459 468 486 515 541<br>563 570 572 593 598 602 603 610 615 648<br>681 696 820 893 946 954 974 983 1001 1017 1026<br>1035 1060 1077 1114 1133 1176 1189 1221 1235 1306 1342 1359<br>1407 1418 1421 1428 1432 1473 1486 1489 1491 1494 1502<br>1510 1531 1567 3033 3037 3039 3045 3099 3104 3104 3109<br>3120 3140 3182 3192 3208 3219 |
| <b>AgSbF<sub>6</sub></b>                     | 6 106 110 156 178 183 243 250 251 261<br>280 320 449 485 556 579 596 598                                                                                                                                                                                                                                                                                                                                                                                                                                                   |
| <b>AgSbF<sub>6</sub> D3a</b>                 | 31 106 111 155 178 184 242 250 251 261<br>281 320 450 485 556 579 596 597                                                                                                                                                                                                                                                                                                                                                                                                                                                  |
| <b>CAT-(SbF<sub>6</sub>)<sub>2</sub></b>     | 17 26 28 49 53 55 62 69 77 92<br>101 105 131 143 151 163 164 174 183 186<br>194 198 209 227 240 245 248 250 252 257<br>258 261 267 270 275 304 330 335 347 356<br>405 414 424 435 452 453 463 485 513 538<br>561 567 570 592 596 598 602 606 615 648<br>680 694 818 889 942 952 972 975 1000 1015 1024<br>1028 1058 1077 1110 1133 1173 1189 1219 1232 1305 1339 1359<br>1404 1418 1421 1426 1429 1473 1486 1489 1490 1494 1500<br>1509 1529 1566 3033 3038 3039 3045 3099 3105 3106 3109<br>3122 3140 3179 3191 3202 3211 |
| <b>CAT-(SbF<sub>6</sub>)<sub>2</sub> D3a</b> | 18 21 41 51 58 64 70 73 83 99<br>107 110 131 143 153 161 169 176 180 186<br>197 201 211 228 244 247 252 252 255 257<br>261 263 269 273 277 302 335 339 348 358<br>407 418 428 440 453 459 468 486 515 541<br>563 570 572 593 598 602 603 610 615 648                                                                                                                                                                                                                                                                       |

|                                                        |                                                                                                                                                                                                                                                                                                                                                                                                                                                                                                                                      |
|--------------------------------------------------------|--------------------------------------------------------------------------------------------------------------------------------------------------------------------------------------------------------------------------------------------------------------------------------------------------------------------------------------------------------------------------------------------------------------------------------------------------------------------------------------------------------------------------------------|
|                                                        | 681 696 820 893 946 954 974 983 1001 1017 1026<br>1035 1060 1077 1114 1133 1176 1189 1221 1235 1306 1342 1359<br>1407 1418 1421 1428 1432 1473 1486 1489 1491 1494 1502<br>1510 1531 1567 3033 3037 3039 3045 3099 3104 3104 3109<br>3120 3140 3182 3192 3208 3219                                                                                                                                                                                                                                                                   |
| $\text{Cu}(\text{OAc})_2 \cdot \text{H}_2\text{O}$     | 12 26 41 45 72 75 88 114 140 182<br>190 194 258 302 344 390 430 455 480 619<br>624 690 703 953 960 1023 1025 1071 1072 1385 1386<br>1441 1444 1463 1465 1496 1501 1518 1524 1600 3049 3049<br>3114 3115 3149 3149 3659 3729                                                                                                                                                                                                                                                                                                          |
| $\text{Cu}(\text{OAc})_2 \cdot \text{H}_2\text{O}$ D3a | 12 22 38 44 70 76 87 115 140 180<br>191 198 258 300 346 389 434 455 480 619<br>624 690 703 954 960 1024 1025 1071 1072 1385 1386<br>1441 1443 1463 1465 1497 1502 1518 1524 1600 3047 3048<br>3113 3113 3148 3148 3655 3725                                                                                                                                                                                                                                                                                                          |
| $\text{CuOAcSbF}_6 \cdot \text{H}_2\text{O}$           | 18 24 50 60 67 90 98 117 147 163<br>177 182 191 245 252 255 262 274 278 283<br>334 362 423 444 484 495 552 563 593 596<br>605 621 712 757 961 1019 1071 1389 1424 1462 1496<br>1512 1599 3050 3116 3154 3558 3635                                                                                                                                                                                                                                                                                                                    |
| $\text{CuOAcSbF}_6 \cdot \text{H}_2\text{O}$<br>D3a    | 21 26 57 64 71 95 108 120 149 166<br>177 183 194 248 250 255 262 273 279 280<br>335 361 427 443 485 497 551 563 595 597<br>607 621 713 758 962 1020 1072 1389 1424 1462 1496<br>1513 1599 3048 3115 3152 3564 3633                                                                                                                                                                                                                                                                                                                   |
| <b>CAT</b>                                             | 24 35 40 45 47 48 66 67 98 109<br>117 146 157 163 177 179 189 203 210 230<br>248 252 256 261 262 268 271 296 300 306<br>327 354 401 406 413 447 453 487 498 510<br>531 562 570 583 586 592 623 645 673 697<br>698 819 891 929 939 948 966 970 983 1006 1009<br>1015 1025 1057 1064 1076 1105 1133 1163 1181 1218 1233 1311<br>1329 1356 1376 1393 1408 1412 1415 1421 1421 1449 1466<br>1471 1475 1480 1488 1492 1497 1499 1503 1536 1564 3003<br>3003 3008 3010 3013 3067 3071 3076 3077 3079 3082 3099<br>3114 3150 3162 3163 3189 |
| <b>CAT</b> D3a                                         | 28 40 44 48 55 58 66 76 96 111<br>122 149 160 175 182 184 192 205 214 232<br>248 251 256 263 265 270 275 301 305 317<br>334 359 407 411 416 450 459 487 499 511                                                                                                                                                                                                                                                                                                                                                                      |

|            |            |                                                                                                                                                                                                                                                                                                                                                                                                                                                                                                                                                                                                                                                                                                                                                                                                                  |
|------------|------------|------------------------------------------------------------------------------------------------------------------------------------------------------------------------------------------------------------------------------------------------------------------------------------------------------------------------------------------------------------------------------------------------------------------------------------------------------------------------------------------------------------------------------------------------------------------------------------------------------------------------------------------------------------------------------------------------------------------------------------------------------------------------------------------------------------------|
|            |            | 533 565 572 585 591 598 624 650 676 699<br>702 822 896 930 945 949 969 974 984 1005 1015<br>1019 1028 1063 1070 1082 1111 1140 1169 1187 1224 1239 1313<br>1337 1364 1387 1404 1417 1423 1427 1430 1438 1464 1478<br>1487 1489 1492 1500 1505 1506 1512 1516 1542 1570 3028<br>3032 3037 3039 3051 3096 3100 3100 3103 3108 3114 3130<br>3148 3180 3192 3205 3228                                                                                                                                                                                                                                                                                                                                                                                                                                                |
| <b>CAT</b> | <b>D3</b>  | 16 27 41 50 52 57 63 76 100 111<br>122 147 160 173 181 185 193 200 214 234<br>238 250 255 258 263 266 269 294 309 320<br>335 352 408 414 418 451 463 491 499 511<br>537 566 574 585 591 599 623 650 684 700<br>702 823 897 929 942 947 969 976 984 1006 1015<br>1019 1026 1065 1070 1081 1115 1137 1173 1187 1225 1239 1312<br>1341 1362 1386 1402 1417 1423 1425 1431 1438 1464 1479<br>1487 1490 1492 1498 1502 1507 1511 1517 1543 1570 3032<br>3036 3040 3042 3052 3098 3103 3104 3107 3114 3117 3133<br>3152 3187 3198 3216 3232                                                                                                                                                                                                                                                                            |
| <b>TS1</b> |            | -70 11 17 26 40 47 48 53 54 55<br>61 66 70 76 85 93 99 110 113 128<br>145 149 161 170 173 177 181 190 214 228<br>234 253 256 257 262 264 267 269 278 279<br>293 313 315 352 357 393 401 411 419 425<br>443 449 482 487 503 520 526 537 561 573<br>580 582 587 627 635 650 669 682 690 696<br>716 730 815 818 840 874 891 920 940 943<br>963 969 971 992 1003 1008 1011 1014 1021 1022 1025<br>1032 1054 1057 1071 1078 1104 1107 1137 1141 1161 1170 1183<br>1183 1185 1206 1222 1236 1304 1305 1330 1332 1361 1364<br>1386 1403 1414 1418 1420 1426 1442 1446 1466 1473 1481<br>1487 1489 1491 1493 1502 1506 1507 1507 1512 1520 1530<br>1537 1562 1575 1618 1642 1671 3024 3031 3034 3035 3037<br>3051 3092 3093 3098 3104 3109 3115 3116 3148 3148 3162<br>3168 3176 3177 3183 3187 3203 3207 3212 3215 3558 |
| <b>TS1</b> | <b>D3a</b> | -68 21 25 35 46 49 53 54 62 62<br>71 74 77 80 100 103 110 114 131 137<br>154 158 165 172 175 183 185 198 216 231<br>235 253 256 259 264 267 268 270 280 283<br>295 318 324 355 359 399 407 418 421 427<br>447 450 482 494 506 516 528 533 566 575<br>584 585 590 627 636 650 670 685 690 698                                                                                                                                                                                                                                                                                                                                                                                                                                                                                                                     |

|             |           |      |      |      |      |      |      |      |      |      |      |
|-------------|-----------|------|------|------|------|------|------|------|------|------|------|
|             |           | 715  | 729  | 817  | 821  | 844  | 873  | 898  | 924  | 940  | 947  |
|             |           | 964  | 971  | 974  | 986  | 1003 | 1011 | 1012 | 1019 | 1023 | 1025 |
|             |           | 1032 | 1056 | 1061 | 1072 | 1081 | 1107 | 1109 | 1138 | 1142 | 1166 |
|             |           | 1184 | 1185 | 1187 | 1207 | 1225 | 1239 | 1307 | 1308 | 1332 | 1335 |
|             |           | 1363 | 1365 | 1386 | 1403 | 1415 | 1423 | 1424 | 1428 | 1447 | 1448 |
|             |           | 1466 | 1477 | 1482 | 1487 | 1488 | 1492 | 1495 | 1503 | 1508 | 1509 |
|             |           | 1510 | 1514 | 1523 | 1531 | 1539 | 1563 | 1576 | 1619 | 1644 | 1670 |
|             |           | 3023 | 3030 | 3031 | 3036 | 3037 | 3051 | 3092 | 3093 | 3097 | 3102 |
|             |           | 3111 | 3113 | 3122 | 3147 | 3150 | 3160 | 3167 | 3175 | 3181 | 3185 |
|             |           | 3186 | 3206 | 3214 | 3216 | 3217 | 3556 |      |      |      |      |
| <b>TS1</b>  | <b>D3</b> | -57  | 12   | 24   | 36   | 45   | 50   | 51   | 54   | 61   | 62   |
|             |           | 69   | 72   | 76   | 84   | 98   | 104  | 106  | 117  | 134  | 134  |
|             |           | 156  | 160  | 164  | 171  | 174  | 183  | 187  | 202  | 219  | 229  |
|             |           | 244  | 254  | 258  | 260  | 262  | 266  | 269  | 280  | 281  | 284  |
|             |           | 296  | 321  | 323  | 356  | 363  | 400  | 410  | 419  | 419  | 431  |
|             |           | 447  | 453  | 482  | 500  | 508  | 518  | 530  | 535  | 568  | 577  |
|             |           | 587  | 588  | 592  | 626  | 637  | 651  | 673  | 687  | 690  | 700  |
|             |           | 714  | 729  | 818  | 822  | 847  | 872  | 901  | 929  | 947  | 949  |
|             |           | 961  | 972  | 976  | 989  | 1000 | 1009 | 1015 | 1019 | 1022 | 1024 |
|             |           | 1026 | 1028 | 1056 | 1062 | 1072 | 1082 | 1110 | 1112 | 1142 | 1144 |
|             |           | 1171 | 1175 | 1184 | 1186 | 1188 | 1208 | 1230 | 1245 | 1310 | 1311 |
|             |           | 1337 | 1339 | 1365 | 1366 | 1386 | 1405 | 1417 | 1424 | 1426 | 1430 |
|             |           | 1447 | 1453 | 1466 | 1478 | 1483 | 1486 | 1491 | 1492 | 1499 | 1504 |
|             |           | 1508 | 1511 | 1512 | 1516 | 1532 | 1539 | 1565 | 1575 | 1620 | 1646 |
|             |           | 1673 | 3027 | 3032 | 3032 | 3041 | 3041 | 3052 | 3096 | 3099 | 3100 |
|             |           | 3106 | 3116 | 3116 | 3127 | 3150 | 3158 | 3165 | 3172 | 3176 | 3180 |
|             |           | 3190 | 3197 | 3207 | 3218 | 3221 | 3234 | 3557 |      |      |      |
| <b>INT1</b> |           | 10   | 17   | 35   | 39   | 45   | 46   | 52   | 54   | 58   | 63   |
|             |           | 65   | 67   | 77   | 78   | 92   | 95   | 114  | 124  | 141  | 149  |
|             |           | 166  | 169  | 171  | 177  | 180  | 185  | 196  | 202  | 226  | 236  |
|             |           | 246  | 260  | 261  | 262  | 265  | 269  | 271  | 273  | 283  | 294  |
|             |           | 296  | 327  | 352  | 355  | 368  | 393  | 397  | 412  | 418  | 430  |
|             |           | 448  | 455  | 488  | 494  | 503  | 528  | 544  | 563  | 574  | 577  |
|             |           | 578  | 585  | 626  | 633  | 647  | 674  | 690  | 694  | 695  | 711  |
|             |           | 718  | 752  | 810  | 817  | 872  | 876  | 893  | 914  | 931  | 941  |
|             |           | 965  | 969  | 971  | 974  | 989  | 1009 | 1013 | 1017 | 1020 | 1022 |
|             |           | 1023 | 1026 | 1055 | 1056 | 1070 | 1080 | 1108 | 1115 | 1137 | 1146 |
|             |           | 1166 | 1180 | 1182 | 1186 | 1201 | 1215 | 1220 | 1234 | 1310 | 1328 |
|             |           | 1334 | 1361 | 1366 | 1376 | 1387 | 1404 | 1417 | 1421 | 1426 | 1428 |
|             |           | 1443 | 1447 | 1465 | 1474 | 1481 | 1486 | 1487 | 1488 | 1492 | 1497 |
|             |           | 1499 | 1501 | 1504 | 1511 | 1526 | 1535 | 1541 | 1568 | 1586 | 1613 |
|             |           | 1632 | 1643 | 3026 | 3031 | 3037 | 3039 | 3047 | 3051 | 3095 | 3100 |
|             |           | 3100 | 3100 | 3104 | 3111 | 3115 | 3118 | 3138 | 3149 | 3158 | 3166 |
|             |           | 3177 | 3180 | 3187 | 3194 | 3197 | 3202 | 3202 | 3207 | 3494 |      |

|                 |                |      |      |      |      |      |      |      |      |      |      |      |
|-----------------|----------------|------|------|------|------|------|------|------|------|------|------|------|
| <b>INT1</b> D3a | 14             | 17   | 39   | 42   | 46   | 49   | 55   | 59   | 62   | 65   |      |      |
|                 | 68             | 70   | 81   | 83   | 98   | 103  | 115  | 128  | 137  | 147  |      |      |
|                 | 166            | 169  | 171  | 174  | 181  | 188  | 196  | 200  | 227  | 232  |      |      |
|                 | 245            | 257  | 260  | 262  | 265  | 270  | 272  | 273  | 286  | 289  |      |      |
|                 | 299            | 329  | 349  | 359  | 373  | 396  | 398  | 416  | 420  | 438  |      |      |
|                 | 448            | 457  | 490  | 493  | 504  | 534  | 546  | 565  | 575  | 578  |      |      |
|                 | 580            | 586  | 626  | 635  | 649  | 680  | 692  | 694  | 696  | 712  |      |      |
|                 | 720            | 754  | 812  | 819  | 875  | 878  | 895  | 920  | 937  | 941  |      |      |
|                 | 965            | 971  | 973  | 979  | 991  | 1012 | 1014 | 1020 | 1020 | 1022 | 1025 |      |
|                 | 1028           | 1056 | 1057 | 1069 | 1079 | 1114 | 1116 | 1135 | 1148 | 1169 | 1182 | 1182 |
|                 | 1186           | 1204 | 1216 | 1223 | 1237 | 1308 | 1332 | 1337 | 1361 | 1370 | 1378 |      |
|                 | 1386           | 1402 | 1418 | 1421 | 1425 | 1430 | 1443 | 1449 | 1465 | 1475 | 1483 |      |
|                 | 1486           | 1487 | 1490 | 1491 | 1497 | 1500 | 1502 | 1502 | 1510 | 1526 | 1537 |      |
|                 | 1542           | 1570 | 1586 | 1618 | 1635 | 1646 | 3027 | 3031 | 3036 | 3038 | 3048 |      |
|                 | 3050           | 3093 | 3099 | 3099 | 3102 | 3111 | 3113 | 3120 | 3140 | 3147 | 3163 |      |
|                 | 3164           | 3176 | 3181 | 3185 | 3194 | 3196 | 3204 | 3206 | 3208 | 3486 |      |      |
|                 | <b>INT1</b> D3 | 21   | 32   | 38   | 42   | 49   | 50   | 57   | 61   | 63   | 66   |      |
|                 |                | 78   | 84   | 87   | 94   | 98   | 107  | 117  | 123  | 141  | 145  |      |
|                 |                | 166  | 171  | 175  | 177  | 183  | 188  | 193  | 208  | 236  | 242  |      |
|                 |                | 248  | 257  | 260  | 264  | 265  | 273  | 276  | 280  | 285  | 288  |      |
| 304             |                | 332  | 351  | 358  | 382  | 398  | 407  | 418  | 434  | 449  |      |      |
| 451             |                | 454  | 492  | 492  | 510  | 545  | 548  | 561  | 578  | 582  |      |      |
| 583             |                | 589  | 626  | 636  | 647  | 651  | 687  | 695  | 695  | 697  |      |      |
| 711             |                | 738  | 812  | 823  | 868  | 875  | 902  | 924  | 939  | 951  |      |      |
| 964             |                | 967  | 972  | 990  | 1012 | 1012 | 1018 | 1021 | 1026 | 1029 | 1035 |      |
| 1055            |                | 1056 | 1070 | 1080 | 1096 | 1115 | 1125 | 1136 | 1156 | 1172 | 1181 | 1185 |
| 1196            |                | 1200 | 1211 | 1227 | 1240 | 1329 | 1335 | 1345 | 1357 | 1366 | 1371 |      |
| 1386            |                | 1408 | 1418 | 1424 | 1425 | 1434 | 1443 | 1444 | 1466 | 1476 | 1484 |      |
| 1486            |                | 1489 | 1496 | 1498 | 1500 | 1503 | 1504 | 1507 | 1520 | 1527 | 1536 |      |
| 1540            |                | 1576 | 1586 | 1625 | 1645 | 1649 | 3032 | 3036 | 3041 | 3046 | 3051 |      |
| 3057            |                | 3099 | 3103 | 3106 | 3109 | 3116 | 3118 | 3132 | 3138 | 3150 | 3169 |      |
| 3177            |                | 3181 | 3184 | 3191 | 3201 | 3205 | 3220 | 3229 | 3265 | 3553 |      |      |
| <b>TS2</b>      |                | -73  | 12   | 15   | 20   | 36   | 40   | 47   | 51   | 52   | 58   |      |
|                 |                | 62   | 68   | 72   | 74   | 82   | 89   | 95   | 101  | 104  | 134  |      |
|                 |                | 151  | 161  | 163  | 175  | 177  | 179  | 183  | 190  | 210  | 225  |      |
|                 |                | 230  | 244  | 253  | 258  | 259  | 263  | 267  | 270  | 279  | 283  |      |
|                 | 283            | 312  | 351  | 357  | 365  | 387  | 403  | 426  | 429  | 437  |      |      |
|                 | 447            | 450  | 504  | 505  | 506  | 527  | 535  | 573  | 577  | 578  |      |      |
|                 | 578            | 588  | 623  | 634  | 648  | 668  | 684  | 693  | 695  | 709  |      |      |
|                 | 734            | 808  | 809  | 856  | 871  | 879  | 894  | 910  | 930  | 937  |      |      |
|                 | 944            | 961  | 973  | 990  | 1001 | 1001 | 1012 | 1018 | 1019 | 1023 | 1027 |      |

|             |     |                                                                                                                                                                                                                                                                                                                                                                                                                                                                                                                                                                                                                                                                                                                                                                                                                     |
|-------------|-----|---------------------------------------------------------------------------------------------------------------------------------------------------------------------------------------------------------------------------------------------------------------------------------------------------------------------------------------------------------------------------------------------------------------------------------------------------------------------------------------------------------------------------------------------------------------------------------------------------------------------------------------------------------------------------------------------------------------------------------------------------------------------------------------------------------------------|
|             |     | 1029 1049 1052 1066 1078 1106 1113 1139 1144 1173 1178 1182<br>1185 1196 1205 1226 1236 1306 1333 1335 1348 1354 1360<br>1386 1399 1405 1415 1419 1428 1434 1450 1463 1472 1477<br>1480 1483 1487 1492 1493 1499 1500 1510 1511 1520 1527<br>1571 1593 1620 1628 1636 1644 3027 3032 3036 3041 3048<br>3051 3083 3095 3100 3106 3107 3109 3110 3127 3143 3146<br>3151 3173 3181 3186 3188 3193 3203 3206 3207 3452                                                                                                                                                                                                                                                                                                                                                                                                  |
| <b>TS2</b>  | D3a | -84 20 24 26 32 41 42 51 57 58<br>60 65 69 74 86 91 99 103 112 135<br>151 159 163 177 178 181 185 193 214 227<br>234 245 256 258 258 264 267 271 280 283<br>284 315 353 359 369 389 404 426 431 442<br>449 453 505 506 507 529 537 575 578 579<br>579 590 624 636 650 669 685 696 697 710<br>736 808 813 870 873 881 898 916 936 940<br>945 963 976 994 1001 1002 1014 1018 1022 1026 1028<br>1029 1050 1054 1066 1079 1108 1114 1141 1145 1175 1179 1182<br>1187 1196 1207 1229 1239 1308 1333 1334 1351 1358 1361<br>1391 1403 1405 1415 1419 1430 1435 1451 1463 1473 1476<br>1481 1484 1488 1492 1493 1500 1502 1511 1513 1523 1528<br>1574 1595 1618 1631 1638 1650 3027 3031 3036 3042 3048<br>3051 3076 3094 3099 3105 3107 3107 3111 3133 3144 3144<br>3150 3171 3183 3185 3188 3192 3203 3206 3208 3445    |
| <b>TS2</b>  | D3  | -100 14 23 25 33 35 45 48 50 57<br>60 63 77 82 90 106 111 123 129 138<br>151 156 166 167 173 184 188 196 217 231<br>234 253 256 257 261 262 265 271 273 281<br>288 321 359 361 368 374 406 423 432 447<br>455 457 500 504 507 526 559 565 574 581<br>584 588 626 637 650 670 688 697 702 721<br>740 808 817 860 874 897 897 926 941 943<br>948 955 976 996 1004 1008 1020 1022 1023 1026 1029<br>1030 1050 1059 1068 1083 1106 1110 1139 1145 1172 1174 1183<br>1190 1198 1206 1229 1240 1311 1328 1337 1358 1362 1365<br>1394 1403 1407 1415 1419 1426 1433 1445 1463 1473 1477<br>1480 1484 1489 1493 1496 1501 1503 1509 1516 1524 1529<br>1573 1601 1615 1627 1639 1668 3029 3035 3043 3047 3051<br>3051 3099 3105 3109 3110 3116 3117 3143 3147 3151 3160<br>3169 3177 3191 3194 3198 3199 3203 3214 3222 3425 |
| <b>INT2</b> |     | 20 23 29 33 41 47 50 53 57 60<br>63 67 70 79 89 95 100 111 132 137                                                                                                                                                                                                                                                                                                                                                                                                                                                                                                                                                                                                                                                                                                                                                  |

|             |            |      |      |      |      |      |      |      |      |      |      |      |      |
|-------------|------------|------|------|------|------|------|------|------|------|------|------|------|------|
|             |            | 151  | 163  | 175  | 177  | 179  | 183  | 185  | 196  | 219  | 227  |      |      |
|             |            | 236  | 251  | 255  | 258  | 259  | 263  | 271  | 278  | 279  | 281  |      |      |
|             |            | 283  | 313  | 351  | 355  | 367  | 383  | 396  | 425  | 430  | 445  |      |      |
|             |            | 449  | 453  | 504  | 505  | 518  | 530  | 544  | 573  | 575  | 578  |      |      |
|             |            | 578  | 589  | 620  | 635  | 646  | 670  | 676  | 694  | 697  | 713  |      |      |
|             |            | 742  | 808  | 813  | 867  | 876  | 888  | 894  | 916  | 929  | 941  |      |      |
|             |            | 945  | 965  | 974  | 991  | 1001 | 1003 | 1012 | 1021 | 1022 | 1025 | 1028 |      |
|             |            | 1040 | 1049 | 1057 | 1064 | 1078 | 1106 | 1109 | 1139 | 1144 | 1173 | 1178 | 1184 |
|             |            | 1189 | 1196 | 1205 | 1224 | 1239 | 1311 | 1321 | 1334 | 1335 | 1356 | 1363 |      |
|             |            | 1391 | 1392 | 1404 | 1415 | 1418 | 1427 | 1430 | 1451 | 1464 | 1475 | 1476 |      |
|             |            | 1479 | 1484 | 1490 | 1492 | 1494 | 1498 | 1502 | 1510 | 1514 | 1527 | 1527 |      |
|             |            | 1573 | 1597 | 1624 | 1634 | 1646 | 1652 | 3028 | 3033 | 3037 | 3043 | 3048 |      |
|             |            | 3052 | 3096 | 3101 | 3105 | 3106 | 3107 | 3107 | 3111 | 3130 | 3144 | 3145 |      |
|             |            | 3152 | 3175 | 3182 | 3184 | 3186 | 3195 | 3201 | 3208 | 3209 | 3435 |      |      |
| <b>INT2</b> | <b>D3a</b> | 21   | 24   | 26   | 33   | 48   | 50   | 51   | 58   | 60   | 60   |      |      |
|             |            | 68   | 70   | 72   | 77   | 93   | 98   | 103  | 122  | 133  | 139  |      |      |
|             |            | 155  | 163  | 174  | 178  | 179  | 183  | 188  | 196  | 218  | 230  |      |      |
|             |            | 239  | 251  | 257  | 258  | 258  | 264  | 272  | 273  | 280  | 282  |      |      |
|             |            | 284  | 312  | 353  | 357  | 367  | 381  | 397  | 421  | 430  | 447  |      |      |
|             |            | 448  | 454  | 506  | 507  | 518  | 530  | 548  | 575  | 576  | 579  |      |      |
|             |            | 579  | 591  | 620  | 637  | 648  | 671  | 679  | 695  | 700  | 715  |      |      |
|             |            | 742  | 808  | 815  | 866  | 882  | 894  | 896  | 918  | 931  | 943  |      |      |
|             |            | 949  | 957  | 976  | 994  | 1002 | 1006 | 1011 | 1022 | 1024 | 1027 | 1029 |      |
|             |            | 1039 | 1048 | 1057 | 1065 | 1079 | 1105 | 1107 | 1140 | 1145 | 1174 | 1178 | 1183 |
|             |            | 1190 | 1196 | 1206 | 1227 | 1242 | 1312 | 1327 | 1334 | 1338 | 1357 | 1364 |      |
|             |            | 1393 | 1397 | 1403 | 1414 | 1418 | 1426 | 1430 | 1451 | 1464 | 1477 | 1477 |      |
|             |            | 1479 | 1484 | 1489 | 1492 | 1496 | 1499 | 1503 | 1510 | 1514 | 1527 | 1528 |      |
|             |            | 1574 | 1601 | 1624 | 1635 | 1647 | 1659 | 3028 | 3032 | 3038 | 3043 | 3046 |      |
|             |            | 3052 | 3095 | 3100 | 3106 | 3107 | 3109 | 3112 | 3128 | 3135 | 3143 | 3147 |      |
|             |            | 3151 | 3173 | 3182 | 3184 | 3186 | 3197 | 3200 | 3206 | 3210 | 3424 |      |      |
| <b>INT2</b> | <b>D3</b>  | 14   | 19   | 23   | 34   | 42   | 45   | 48   | 54   | 62   | 66   |      |      |
|             |            | 70   | 75   | 79   | 88   | 97   | 108  | 116  | 126  | 135  | 141  |      |      |
|             |            | 159  | 162  | 167  | 171  | 179  | 184  | 189  | 206  | 220  | 232  |      |      |
|             |            | 242  | 254  | 259  | 263  | 264  | 264  | 272  | 280  | 281  | 284  |      |      |
|             |            | 286  | 324  | 358  | 360  | 362  | 381  | 398  | 418  | 431  | 448  |      |      |
|             |            | 451  | 454  | 506  | 509  | 522  | 526  | 556  | 572  | 573  | 579  |      |      |
|             |            | 584  | 591  | 623  | 634  | 647  | 673  | 677  | 689  | 707  | 720  |      |      |
|             |            | 739  | 801  | 819  | 856  | 859  | 898  | 918  | 933  | 936  | 942  |      |      |
|             |            | 946  | 953  | 977  | 993  | 1004 | 1006 | 1015 | 1017 | 1024 | 1027 | 1030 |      |
|             |            | 1031 | 1051 | 1063 | 1066 | 1083 | 1106 | 1107 | 1139 | 1147 | 1171 | 1172 | 1186 |
|             |            | 1188 | 1199 | 1206 | 1228 | 1241 | 1310 | 1330 | 1332 | 1334 | 1364 | 1365 |      |

|             |     |                                                                                                                                                                                                                                                                                                                                                                                                                                                                                                                                                                                                                                                                                                                                                                                                                   |
|-------------|-----|-------------------------------------------------------------------------------------------------------------------------------------------------------------------------------------------------------------------------------------------------------------------------------------------------------------------------------------------------------------------------------------------------------------------------------------------------------------------------------------------------------------------------------------------------------------------------------------------------------------------------------------------------------------------------------------------------------------------------------------------------------------------------------------------------------------------|
|             |     | 1392 1397 1402 1413 1417 1423 1427 1444 1465 1475 1476<br>1477 1487 1490 1493 1500 1501 1506 1510 1515 1524 1525<br>1572 1601 1618 1632 1655 1681 3031 3036 3042 3046 3050<br>3054 3100 3105 3108 3110 3111 3115 3134 3145 3155 3163<br>3179 3193 3194 3197 3198 3205 3209 3210 3224 3402                                                                                                                                                                                                                                                                                                                                                                                                                                                                                                                         |
| <b>TS3</b>  |     | -1127 11 25 30 32 36 41 47 54 55<br>57 63 72 80 91 97 117 130 144 152<br>158 161 169 172 176 185 200 210 217 234<br>235 242 255 258 261 263 268 270 273 275<br>288 308 322 349 353 370 392 406 416 443<br>448 460 475 499 505 523 531 550 568 569<br>578 578 587 638 645 658 672 688 700 706<br>721 762 779 817 818 869 893 903 913 940<br>942 954 974 983 986 995 1006 1021 1026 1029 1034<br>1044 1060 1064 1071 1079 1105 1135 1139 1145 1163 1179 1184<br>1187 1196 1212 1220 1239 1312 1314 1323 1326 1362 1373<br>1385 1395 1402 1413 1415 1421 1425 1446 1451 1472 1476<br>1478 1481 1486 1489 1491 1493 1500 1501 1502 1506 1513<br>1539 1571 1574 1603 1610 1631 1640 3030 3032 3039 3039<br>3048 3054 3094 3099 3101 3104 3105 3113 3117 3132 3150<br>3157 3162 3175 3178 3183 3186 3196 3200 3217 3477 |
| <b>INT3</b> |     | 17 25 28 35 42 42 45 50 54 61<br>63 66 85 97 116 121 125 150 159 160<br>166 171 172 183 187 196 203 211 218 239<br>245 250 256 256 259 262 263 271 274 275<br>282 322 337 363 375 392 410 420 438 443<br>459 475 499 502 513 516 530 536 566 571<br>573 574 580 611 639 642 668 671 695 704<br>723 760 815 816 852 873 892 894 908 911<br>934 939 971 972 984 1011 1015 1021 1024 1034 1046<br>1054 1069 1070 1081 1084 1103 1136 1142 1156 1156 1180 1181<br>1187 1194 1217 1235 1277 1300 1314 1320 1329 1358 1360<br>1390 1400 1410 1412 1425 1427 1436 1453 1466 1469 1471<br>1472 1476 1486 1490 1493 1498 1503 1505 1509 1511 1541<br>1547 1573 1596 1618 1625 1690 3011 3030 3034 3035 3054<br>3057 3093 3098 3098 3101 3103 3111 3127 3145 3146 3151<br>3156 3166 3174 3177 3188 3192 3205 3234 3247 3541 |
| <b>TS3</b>  | D3a | -1131 18 24 33 35 42 48 54 55 57<br>61 66 77 82 95 100 119 132 147 151<br>161 164 171 173 176 186 202 209 216 235<br>237 245 256 258 263 264 269 272 275 276                                                                                                                                                                                                                                                                                                                                                                                                                                                                                                                                                                                                                                                      |



|             |           |       |      |      |      |      |      |      |      |      |      |
|-------------|-----------|-------|------|------|------|------|------|------|------|------|------|
|             |           | 290   | 310  | 325  | 352  | 356  | 372  | 396  | 407  | 416  | 446  |
|             |           | 449   | 463  | 476  | 500  | 506  | 525  | 534  | 553  | 570  | 570  |
|             |           | 579   | 579  | 588  | 637  | 647  | 660  | 673  | 691  | 701  | 707  |
|             |           | 721   | 762  | 776  | 817  | 820  | 871  | 896  | 904  | 912  | 940  |
|             |           | 941   | 955  | 975  | 984  | 986  | 996  | 1008 | 1024 | 1026 | 1030 |
|             |           | 1045  | 1061 | 1065 | 1071 | 1081 | 1108 | 1136 | 1140 | 1146 | 1165 |
|             |           | 1188  | 1198 | 1213 | 1224 | 1242 | 1313 | 1316 | 1324 | 1327 | 1364 |
|             |           | 1386  | 1392 | 1402 | 1416 | 1418 | 1423 | 1425 | 1447 | 1451 | 1474 |
|             |           | 1480  | 1481 | 1489 | 1490 | 1491 | 1493 | 1499 | 1502 | 1503 | 1507 |
|             |           | 1541  | 1572 | 1575 | 1604 | 1610 | 1633 | 1643 | 3030 | 3033 | 3038 |
|             |           | 3047  | 3053 | 3093 | 3098 | 3101 | 3103 | 3104 | 3112 | 3121 | 3133 |
|             |           | 3156  | 3160 | 3173 | 3179 | 3183 | 3184 | 3196 | 3200 | 3219 | 3475 |
| <b>TS3</b>  | <b>D3</b> | -1136 | 15   | 22   | 28   | 33   | 35   | 46   | 48   | 54   | 57   |
|             |           | 61    | 66   | 79   | 84   | 95   | 102  | 123  | 136  | 151  | 159  |
|             |           | 163   | 170  | 171  | 174  | 177  | 189  | 204  | 210  | 218  | 233  |
|             |           | 239   | 247  | 256  | 258  | 263  | 268  | 270  | 272  | 274  | 276  |
|             |           | 291   | 314  | 329  | 356  | 365  | 374  | 401  | 412  | 418  | 449  |
|             |           | 452   | 467  | 480  | 501  | 507  | 526  | 533  | 558  | 571  | 575  |
|             |           | 580   | 581  | 589  | 635  | 648  | 662  | 676  | 692  | 703  | 707  |
|             |           | 715   | 734  | 772  | 818  | 821  | 871  | 900  | 909  | 924  | 943  |
|             |           | 945   | 957  | 976  | 991  | 992  | 1005 | 1012 | 1027 | 1028 | 1031 |
|             |           | 1046  | 1065 | 1066 | 1071 | 1084 | 1110 | 1138 | 1142 | 1146 | 1168 |
|             |           | 1189  | 1199 | 1220 | 1228 | 1245 | 1314 | 1320 | 1330 | 1331 | 1365 |
|             |           | 1385  | 1392 | 1403 | 1418 | 1420 | 1425 | 1428 | 1447 | 1452 | 1474 |
|             |           | 1481  | 1483 | 1489 | 1490 | 1493 | 1494 | 1500 | 1503 | 1505 | 1508 |
|             |           | 1541  | 1574 | 1575 | 1606 | 1611 | 1634 | 1646 | 3033 | 3036 | 3043 |
|             |           | 3049  | 3055 | 3097 | 3102 | 3106 | 3106 | 3107 | 3116 | 3123 | 3137 |
|             |           | 3158  | 3165 | 3178 | 3184 | 3189 | 3190 | 3202 | 3214 | 3223 | 3477 |
| <b>INT4</b> |           | 10    | 14   | 19   | 22   | 29   | 33   | 38   | 43   | 47   | 51   |
|             |           | 54    | 60   | 62   | 66   | 70   | 70   | 75   | 82   | 92   | 93   |
|             |           | 99    | 113  | 125  | 126  | 140  | 149  | 158  | 161  | 167  | 168  |
|             |           | 172   | 174  | 175  | 182  | 187  | 198  | 200  | 204  | 225  | 240  |
|             |           | 249   | 255  | 259  | 259  | 263  | 265  | 267  | 271  | 275  | 283  |
|             |           | 298   | 299  | 323  | 334  | 340  | 361  | 368  | 382  | 408  | 424  |
|             |           | 438   | 441  | 444  | 446  | 456  | 457  | 499  | 503  | 510  | 523  |
|             |           | 531   | 539  | 566  | 568  | 576  | 582  | 591  | 597  | 606  | 609  |
|             |           | 622   | 638  | 663  | 695  | 701  | 706  | 710  | 715  | 717  | 753  |
|             |           | 774   | 781  | 785  | 812  | 821  | 856  | 877  | 888  | 892  | 897  |
|             |           | 910   | 917  | 944  | 948  | 957  | 973  | 973  | 979  | 993  | 1013 |
|             |           | 1015  | 1015 | 1019 | 1034 | 1038 | 1043 | 1068 | 1070 | 1070 | 1072 |
|             |           | 1101  | 1105 | 1130 | 1138 | 1140 | 1147 | 1151 | 1168 | 1185 | 1188 |
|             |           | 1194  | 1199 |      |      |      |      |      |      |      |      |

|             |            |                                                                                                                                                                                                                                                                                                                                                                                                                                                                                                                                                                                                                                                                                                                                                                                                                                                                                                                                                                                                                                                      |
|-------------|------------|------------------------------------------------------------------------------------------------------------------------------------------------------------------------------------------------------------------------------------------------------------------------------------------------------------------------------------------------------------------------------------------------------------------------------------------------------------------------------------------------------------------------------------------------------------------------------------------------------------------------------------------------------------------------------------------------------------------------------------------------------------------------------------------------------------------------------------------------------------------------------------------------------------------------------------------------------------------------------------------------------------------------------------------------------|
|             |            | 1219 1233 1239 1240 1285 1317 1318 1324 1334 1366 1370<br>1371 1373 1375 1393 1404 1406 1415 1416 1417 1422 1426<br>1429 1443 1465 1469 1473 1474 1475 1486 1486 1488 1491<br>1491 1492 1500 1504 1506 1513 1514 1547 1563 1579 1603<br>1625 1631 1714 1754 1787 3031 3036 3040 3042 3052 3060<br>3064 3068 3098 3102 3103 3106 3107 3109 3110 3121 3125<br>3132 3149 3150 3151 3160 3161 3179 3183 3190 3194 3205<br>3207 3222 3241 3442 3523                                                                                                                                                                                                                                                                                                                                                                                                                                                                                                                                                                                                       |
| <b>INT4</b> | <b>D3a</b> | 25 26 35 37 39 44 50 54 57 58<br>63 65 72 73 78 79 84 90 103 104<br>108 121 133 134 145 154 161 166 168 173<br>175 178 180 190 194 204 207 210 229 244<br>253 259 260 261 266 270 274 275 279 289<br>303 304 329 341 345 366 373 388 412 425<br>442 444 448 453 459 466 501 506 512 523<br>533 546 569 572 580 585 591 599 610 614<br>625 643 666 697 704 709 711 718 723 755<br>775 784 787 812 825 861 881 888 896 907<br>913 928 947 951 962 972 976 982 997 1014 1016<br>1017 1018 1018 1037 1042 1045 1070 1070 1073 1077 1083<br>1105 1108 1136 1141 1144 1148 1152 1172 1187 1190 1199 1201<br>1222 1237 1242 1250 1289 1321 1323 1328 1336 1368 1373<br>1375 1378 1380 1396 1405 1408 1416 1417 1422 1424 1427<br>1432 1444 1467 1471 1473 1476 1477 1487 1488 1488 1492<br>1492 1494 1502 1506 1508 1516 1520 1549 1566 1582 1605<br>1628 1636 1722 1758 1794 3030 3037 3041 3043 3052 3063<br>3066 3067 3097 3101 3102 3106 3108 3110 3110 3123 3128<br>3137 3149 3151 3153 3159 3161 3181 3189 3191 3202 3209<br>3217 3227 3254 3414 3539 |
| <b>INT4</b> | <b>D3</b>  | 17 20 26 36 38 48 51 53 56 59<br>62 66 69 75 81 85 90 95 101 110<br>117 126 137 139 149 156 165 168 169 173<br>175 182 182 195 198 204 210 212 232 244<br>255 259 262 265 267 269 272 276 281 289<br>304 309 332 344 345 370 376 391 411 427<br>443 446 449 459 462 473 502 509 512 523<br>536 551 569 573 581 589 591 599 612 616<br>625 644 670 698 705 712 712 720 726 754<br>774 784 788 812 825 866 885 888 898 910<br>912 935 949 952 964 971 977 984 998 1014 1016<br>1018 1019 1020 1032 1044 1048 1068 1070 1073 1077 1083                                                                                                                                                                                                                                                                                                                                                                                                                                                                                                                  |

|            |     |                                                                                                                                                                                                                                                                                                                                                                                                                                                                                                                                                                                                                                                                                                                                                                                                                                                                                                                                                                                                                                                     |
|------------|-----|-----------------------------------------------------------------------------------------------------------------------------------------------------------------------------------------------------------------------------------------------------------------------------------------------------------------------------------------------------------------------------------------------------------------------------------------------------------------------------------------------------------------------------------------------------------------------------------------------------------------------------------------------------------------------------------------------------------------------------------------------------------------------------------------------------------------------------------------------------------------------------------------------------------------------------------------------------------------------------------------------------------------------------------------------------|
|            |     | 1105 1110 1138 1141 1143 1148 1154 1175 1188 1192 1198 1203<br>1224 1237 1243 1258 1290 1321 1322 1331 1337 1369 1375<br>1375 1382 1382 1398 1405 1408 1417 1418 1426 1426 1428<br>1432 1445 1467 1472 1474 1477 1478 1485 1487 1490 1492<br>1492 1494 1502 1506 1508 1516 1524 1551 1567 1583 1607<br>1631 1641 1724 1754 1798 3033 3042 3043 3047 3054 3067<br>3067 3073 3101 3103 3106 3110 3112 3113 3114 3126 3136<br>3141 3155 3155 3156 3162 3166 3186 3194 3199 3209 3210<br>3219 3232 3280 3379 3541                                                                                                                                                                                                                                                                                                                                                                                                                                                                                                                                       |
| <b>TS4</b> |     | -295 21 24 29 34 38 40 43 47 52<br>56 58 60 63 67 69 74 79 88 97<br>100 105 112 123 127 134 140 157 159 164<br>169 172 178 185 190 197 211 218 227 231<br>246 248 257 259 260 270 273 274 277 286<br>307 310 317 344 351 363 372 382 407 420<br>436 443 444 447 459 468 483 505 508 527<br>553 559 574 577 581 585 598 607 609 634<br>647 653 682 685 694 696 703 710 719 748<br>781 786 795 808 821 849 870 883 892 892<br>914 942 945 946 958 974 976 984 992 997<br>1003 1003 1014 1017 1018 1034 1059 1069 1070 1072 1077<br>1098 1105 1121 1130 1135 1139 1147 1165 1185 1187 1191 1199<br>1219 1224 1236 1238 1245 1294 1313 1322 1333 1336 1348<br>1365 1369 1373 1374 1381 1399 1405 1411 1416 1417 1421<br>1422 1428 1450 1467 1470 1474 1476 1477 1484 1485 1488<br>1488 1492 1493 1501 1502 1505 1510 1512 1552 1567 1574<br>1602 1618 1638 1719 1765 1791 3029 3037 3038 3043 3050<br>3052 3063 3071 3094 3098 3100 3104 3105 3109 3110 3114<br>3114 3128 3129 3152 3155 3160 3170 3175 3179 3181 3182<br>3187 3194 3207 3215 3444 3486 |
| <b>TS4</b> | D3a | -305 21 25 31 32 35 42 47 49 51<br>56 61 65 66 69 71 77 79 90 97<br>105 109 114 125 131 134 142 157 160 165<br>169 174 182 187 191 198 212 219 229 233<br>246 249 256 259 262 271 272 275 278 289<br>310 314 321 348 353 367 374 386 408 423<br>436 444 447 449 463 469 484 507 509 530<br>556 560 574 579 582 587 599 608 613 635<br>646 655 683 686 697 698 711 718 720 748<br>780 787 796 808 823 860 878 890 897 902<br>919 945 946 949 960 975 975 984 994 998                                                                                                                                                                                                                                                                                                                                                                                                                                                                                                                                                                                 |

|             |    |                                                                                                                                                                                                                                                                                                                                                                                                                                                                                                                                                                                                                                                                                                                                                                                                                                                                                                                                                                                                                                                      |
|-------------|----|------------------------------------------------------------------------------------------------------------------------------------------------------------------------------------------------------------------------------------------------------------------------------------------------------------------------------------------------------------------------------------------------------------------------------------------------------------------------------------------------------------------------------------------------------------------------------------------------------------------------------------------------------------------------------------------------------------------------------------------------------------------------------------------------------------------------------------------------------------------------------------------------------------------------------------------------------------------------------------------------------------------------------------------------------|
|             |    | 1004 1005 1015 1017 1022 1034 1059 1069 1070 1073 1077<br>1097 1107 1123 1132 1136 1141 1148 1168 1185 1188 1192 1202<br>1221 1224 1239 1245 1246 1296 1314 1322 1334 1337 1349<br>1365 1375 1376 1378 1383 1402 1406 1412 1416 1421 1422<br>1423 1431 1450 1467 1472 1474 1476 1476 1486 1487 1488<br>1488 1492 1493 1502 1502 1506 1511 1514 1553 1569 1575<br>1604 1621 1644 1722 1764 1796 3028 3038 3039 3042 3049<br>3052 3067 3070 3093 3100 3100 3103 3104 3109 3109 3113<br>3121 3127 3132 3155 3156 3159 3168 3178 3181 3181 3182<br>3190 3194 3209 3219 3399 3476                                                                                                                                                                                                                                                                                                                                                                                                                                                                         |
| <b>TS4</b>  | D3 | -308 22 25 32 36 40 48 51 57 58<br>60 61 67 70 72 79 83 88 97 105<br>112 120 127 132 135 142 155 158 163 167<br>172 179 189 192 193 197 213 221 228 230<br>242 250 256 262 263 270 274 282 284 295<br>310 319 324 351 356 371 377 392 413 425<br>433 445 451 452 466 470 484 512 516 536<br>559 562 576 584 585 592 600 611 615 638<br>649 659 685 693 699 702 715 720 746 754<br>786 789 797 808 825 866 883 889 903 915<br>932 947 953 955 973 977 982 988 994 997<br>1007 1010 1016 1018 1026 1034 1060 1070 1073 1078 1079<br>1100 1112 1126 1136 1138 1145 1148 1174 1185 1190 1193 1206<br>1221 1223 1241 1246 1258 1300 1312 1324 1339 1341 1359<br>1365 1374 1383 1385 1385 1404 1408 1411 1419 1423 1426<br>1430 1435 1451 1468 1474 1474 1477 1480 1487 1488 1489<br>1490 1493 1493 1502 1502 1509 1511 1515 1552 1574 1576<br>1606 1624 1651 1724 1759 1799 3031 3042 3045 3047 3052<br>3055 3072 3073 3097 3103 3105 3107 3108 3112 3113 3114<br>3130 3135 3141 3156 3162 3162 3174 3184 3188 3188 3189<br>3196 3200 3214 3215 3353 3456 |
| <b>INT5</b> |    | 16 19 22 37 46 49 56 58 60 64<br>65 69 74 78 83 92 121 123 144 154<br>160 163 165 170 176 178 180 185 208 210<br>214 226 233 237 252 259 260 264 267 272<br>279 283 305 310 315 332 350 354 361 385<br>388 408 426 437 449 462 470 487 503 506<br>526 555 570 572 577 578 581 588 604 643<br>654 671 679 691 700 726 741 753 769 783<br>790 811 811 829 861 870 893 895 922 934<br>942 952 970 975 988 990 1000 1007 1014 1018 1020                                                                                                                                                                                                                                                                                                                                                                                                                                                                                                                                                                                                                  |

|             |     |                                                                                                                                                                                                                                                                                                                                                                                                                                                                                                                                                                                                                                                                                                                                                                                                                                                                                                                                       |
|-------------|-----|---------------------------------------------------------------------------------------------------------------------------------------------------------------------------------------------------------------------------------------------------------------------------------------------------------------------------------------------------------------------------------------------------------------------------------------------------------------------------------------------------------------------------------------------------------------------------------------------------------------------------------------------------------------------------------------------------------------------------------------------------------------------------------------------------------------------------------------------------------------------------------------------------------------------------------------|
|             |     | 1021 1033 1051 1073 1077 1078 1111 1113 1123 1140 1145 1146<br>1171 1180 1187 1194 1203 1207 1224 1234 1240 1243 1270<br>1294 1310 1316 1337 1346 1360 1370 1385 1393 1404 1409<br>1415 1417 1422 1423 1430 1451 1474 1474 1477 1483 1487<br>1489 1492 1493 1499 1501 1503 1507 1512 1514 1524 1572<br>1592 1616 1636 1660 1697 1777 3028 3033 3035 3038 3042<br>3044 3051 3073 3091 3097 3100 3102 3103 3105 3109 3109<br>3115 3129 3139 3152 3173 3182 3190 3191 3193 3203 3206<br>3207 3399                                                                                                                                                                                                                                                                                                                                                                                                                                        |
| <b>INT5</b> | D3a | 18 24 26 39 43 49 54 61 62 63<br>66 71 73 78 86 96 123 127 144 155<br>160 164 165 171 176 178 181 185 207 210<br>213 226 233 238 253 259 261 263 264 272<br>280 284 305 312 316 335 351 357 363 387<br>391 406 427 439 450 464 470 488 506 509<br>526 555 572 573 575 578 583 590 608 645<br>658 671 677 692 703 729 739 753 767 785<br>791 812 813 830 864 881 890 896 915 937<br>943 955 971 975 987 992 1005 1008 1017 1019 1021<br>1023 1032 1052 1076 1076 1082 1113 1115 1127 1141 1145 1149<br>1172 1182 1188 1196 1205 1210 1228 1233 1241 1244 1271<br>1293 1310 1318 1337 1339 1359 1373 1386 1392 1405 1410<br>1415 1417 1424 1425 1431 1451 1473 1475 1477 1482 1486<br>1487 1492 1492 1500 1502 1503 1508 1513 1514 1523 1575<br>1595 1618 1638 1664 1700 1781 3026 3033 3036 3041 3041<br>3042 3050 3071 3090 3096 3099 3104 3105 3107 3108 3111<br>3114 3128 3141 3150 3173 3183 3189 3192 3194 3205 3206<br>3209 3402 |
| <b>INT5</b> | D3  | 10 19 24 29 35 38 43 48 49 52<br>59 61 73 84 92 100 122 131 140 145<br>159 160 163 166 170 175 178 183 202 209<br>216 224 233 238 252 255 256 260 262 268<br>272 277 306 312 316 334 351 356 360 385<br>390 403 426 438 452 466 471 485 502 510<br>529 559 565 574 576 578 585 593 609 648<br>659 672 680 695 702 732 747 755 763 782<br>789 814 815 836 841 875 876 885 898 906<br>942 956 974 977 982 984 996 1009 1012 1013 1020<br>1026 1029 1052 1076 1078 1085 1116 1118 1130 1139 1145 1154<br>1173 1183 1185 1195 1207 1215 1231 1234 1244 1246 1277<br>1297 1311 1318 1343 1351 1363 1373 1385 1387 1404 1409                                                                                                                                                                                                                                                                                                                |

|                 |                                                                                                                                                                                                                                                                                                                                                                                                                                                                                                                                                                                                                                                                                                                                                                                                                                                                                                                                                                                                                                                      |
|-----------------|------------------------------------------------------------------------------------------------------------------------------------------------------------------------------------------------------------------------------------------------------------------------------------------------------------------------------------------------------------------------------------------------------------------------------------------------------------------------------------------------------------------------------------------------------------------------------------------------------------------------------------------------------------------------------------------------------------------------------------------------------------------------------------------------------------------------------------------------------------------------------------------------------------------------------------------------------------------------------------------------------------------------------------------------------|
|                 | 1417 1421 1424 1425 1431 1450 1474 1476 1480 1482 1486<br>1487 1492 1493 1499 1502 1502 1506 1514 1515 1526 1575<br>1599 1612 1640 1663 1702 1784 3028 3036 3038 3038 3044<br>3051 3056 3076 3091 3099 3102 3107 3109 3112 3113 3116<br>3119 3131 3146 3154 3176 3184 3190 3196 3196 3211 3211<br>3212 3415                                                                                                                                                                                                                                                                                                                                                                                                                                                                                                                                                                                                                                                                                                                                          |
| <b>INT6</b>     | 13 15 28 30 35 44 49 51 53 53<br>56 60 65 67 80 84 92 96 105 108<br>119 127 138 141 153 160 163 166 172 173<br>174 179 187 187 197 215 220 224 229 242<br>249 257 258 261 261 268 272 274 274 310<br>311 315 338 351 355 370 377 393 408 417<br>427 444 452 487 489 497 504 511 528 547<br>567 569 576 577 578 588 614 618 632 643<br>655 674 676 694 705 718 727 755 766 778<br>795 797 804 815 823 854 880 885 897 897<br>915 934 943 950 972 977 984 989 994 1009 1012<br>1017 1023 1028 1037 1054 1064 1069 1076 1080 1090 1110 1111<br>1118 1138 1147 1147 1167 1182 1184 1190 1194 1205 1218 1227<br>1238 1242 1262 1265 1302 1314 1324 1340 1344 1357 1369<br>1372 1377 1386 1405 1409 1410 1415 1419 1420 1430 1440<br>1452 1462 1470 1475 1477 1480 1486 1488 1490 1493 1493<br>1500 1501 1501 1506 1514 1526 1539 1569 1598 1605 1627<br>1642 1661 1693 1786 2999 3012 3029 3036 3037 3042 3046<br>3055 3074 3078 3092 3095 3097 3100 3102 3104 3110 3110<br>3112 3128 3128 3147 3169 3170 3180 3181 3190 3192 3195<br>3196 3211 3240 3495 |
| <b>INT6</b> D3a | 20 22 24 30 34 40 49 51 54 55<br>57 60 62 74 76 87 94 102 104 110<br>113 124 139 141 157 161 161 163 167 169<br>176 178 187 192 199 216 221 231 233 244<br>248 253 256 258 263 264 266 267 283 313<br>313 318 337 353 358 374 382 396 409 422<br>430 445 453 489 490 492 503 515 531 548<br>563 570 573 578 578 585 615 619 635 647<br>657 676 678 696 710 722 730 756 762 779<br>797 798 803 817 826 854 882 884 893 900<br>918 934 943 954 973 974 978 993 996 1010 1010<br>1019 1026 1028 1038 1053 1066 1070 1077 1082 1089 1113<br>1114 1121 1138 1145 1149 1169 1182 1183 1191 1195 1207 1222<br>1228 1240 1244 1259 1267 1302 1314 1326 1343 1347 1358                                                                                                                                                                                                                                                                                                                                                                                        |

|                |                                                                                                                                                                                                                                                                                                                                                                                                                                                                                                                                                                                                                                                                                                                                                                                                                                                                                                                                                                                                                                                      |
|----------------|------------------------------------------------------------------------------------------------------------------------------------------------------------------------------------------------------------------------------------------------------------------------------------------------------------------------------------------------------------------------------------------------------------------------------------------------------------------------------------------------------------------------------------------------------------------------------------------------------------------------------------------------------------------------------------------------------------------------------------------------------------------------------------------------------------------------------------------------------------------------------------------------------------------------------------------------------------------------------------------------------------------------------------------------------|
|                | 1375 1376 1379 1387 1405 1410 1413 1416 1418 1422 1430<br>1441 1449 1460 1470 1476 1478 1481 1482 1487 1492 1493<br>1493 1500 1501 1502 1506 1513 1528 1538 1570 1606 1614<br>1632 1644 1664 1697 1791 3001 3015 3027 3037 3037 3040<br>3044 3054 3072 3081 3091 3096 3097 3099 3102 3103 3109<br>3112 3113 3127 3130 3146 3167 3172 3182 3184 3192 3193<br>3198 3206 3209 3255 3476                                                                                                                                                                                                                                                                                                                                                                                                                                                                                                                                                                                                                                                                 |
| <b>INT6 D3</b> | 18 20 25 31 33 39 43 51 54 57<br>60 64 73 76 80 88 93 99 105 111<br>117 130 132 138 143 162 163 164 167 171<br>178 180 188 196 202 219 221 232 238 243<br>252 256 257 260 262 265 268 269 287 314<br>315 321 346 356 362 378 385 396 415 425<br>434 448 457 491 494 496 504 520 533 551<br>565 574 574 578 582 585 613 622 642 648<br>658 680 683 697 715 727 737 758 780 783<br>798 799 805 817 828 860 884 886 896 903<br>917 936 945 956 974 976 984 996 999 1010 1012<br>1022 1027 1031 1041 1055 1070 1074 1077 1084 1102 1116 1117<br>1123 1138 1146 1152 1173 1183 1184 1193 1194 1209 1225 1232<br>1242 1245 1258 1270 1307 1314 1330 1346 1348 1358 1375<br>1381 1382 1387 1406 1410 1415 1417 1419 1423 1431 1441<br>1450 1461 1471 1477 1477 1481 1483 1487 1490 1493 1493<br>1501 1501 1502 1505 1515 1532 1537 1571 1610 1622 1637<br>1648 1668 1701 1796 3006 3016 3030 3040 3041 3042 3046<br>3055 3075 3090 3093 3100 3100 3103 3104 3105 3113 3118<br>3119 3130 3130 3150 3172 3176 3189 3190 3196 3198 3203<br>3210 3216 3267 3476 |
| <b>TS5</b>     | -1319 2 16 18 22 33 42 45 47 50<br>52 54 56 61 63 75 78 87 91 104<br>106 113 129 138 146 151 154 154 165 169<br>176 179 183 189 200 204 209 219 230 244<br>251 254 257 258 260 263 271 272 276 282<br>310 316 320 347 354 366 376 382 398 423<br>425 433 441 447 469 488 492 503 528 551<br>561 566 571 576 579 580 581 601 637 642<br>651 662 675 686 694 697 718 723 745 749<br>775 784 803 816 818 842 881 894 901 919<br>942 943 947 952 971 983 997 1005 1008 1015 1017<br>1022 1023 1031 1041 1048 1053 1071 1072 1079 1085 1108<br>1114 1128 1139 1145 1148 1169 1181 1189 1193 1199 1202 1220                                                                                                                                                                                                                                                                                                                                                                                                                                                |

|            |     |                                                                                                                                                                                                                                                                                                                                                                                                                                                                                                                                                                                                                                                                                                                                                                                                                                                                                                                                                                                                                                                          |
|------------|-----|----------------------------------------------------------------------------------------------------------------------------------------------------------------------------------------------------------------------------------------------------------------------------------------------------------------------------------------------------------------------------------------------------------------------------------------------------------------------------------------------------------------------------------------------------------------------------------------------------------------------------------------------------------------------------------------------------------------------------------------------------------------------------------------------------------------------------------------------------------------------------------------------------------------------------------------------------------------------------------------------------------------------------------------------------------|
|            |     | 1224 1238 1245 1280 1293 1312 1319 1324 1339 1348 1356<br>1370 1373 1381 1389 1405 1408 1410 1415 1418 1419 1431<br>1438 1449 1464 1473 1474 1477 1480 1482 1487 1487 1493<br>1493 1498 1501 1505 1509 1514 1523 1524 1565 1575 1583<br>1605 1608 1624 1642 1705 1786 3017 3031 3033 3037 3038<br>3042 3049 3054 3057 3076 3094 3099 3104 3104 3106 3109<br>3110 3110 3117 3131 3138 3157 3161 3171 3185 3187 3194<br>3196 3199 3200 3209 3477                                                                                                                                                                                                                                                                                                                                                                                                                                                                                                                                                                                                           |
| <b>TS5</b> | D3a | -1389 17 19 28 29 39 42 47 51 53<br>57 59 65 67 71 77 85 86 93 106<br>110 121 137 142 151 153 161 165 166 169<br>170 178 186 189 203 206 210 222 233 244<br>254 255 256 260 263 266 269 273 276 280<br>313 316 323 346 356 369 377 384 399 424<br>429 434 440 449 470 487 493 505 529 550<br>559 569 576 576 578 582 582 603 636 643<br>653 663 678 690 696 699 718 722 743 747<br>777 788 802 818 822 845 883 898 904 920<br>941 942 951 955 972 988 996 1004 1011 1016 1022<br>1023 1027 1037 1043 1053 1055 1071 1075 1080 1087 1111 1117<br>1131 1139 1146 1152 1173 1183 1190 1193 1203 1205 1225 1229<br>1243 1247 1284 1294 1314 1319 1322 1340 1349 1358 1377<br>1379 1382 1390 1405 1409 1413 1416 1420 1420 1431 1441<br>1450 1461 1475 1476 1480 1482 1483 1486 1490 1493 1493<br>1498 1501 1504 1512 1517 1523 1527 1567 1578 1589 1607<br>1614 1631 1645 1708 1790 3018 3028 3029 3037 3039 3041<br>3050 3051 3059 3076 3093 3098 3103 3104 3105 3108 3109<br>3113 3119 3130 3137 3154 3162 3169 3187 3191 3195 3199<br>3201 3204 3208 3475 |
| <b>TS5</b> | D3  | -1448 13 21 29 33 38 45 47 50 53<br>56 57 65 71 73 86 86 89 101 109<br>114 124 137 147 151 153 160 163 168 171<br>173 179 184 190 208 209 214 224 235 243<br>255 257 259 260 263 266 267 274 278 282<br>314 319 325 347 358 371 379 386 401 426<br>431 437 445 452 473 488 496 505 531 548<br>559 570 575 578 579 582 585 606 633 646<br>656 664 679 692 698 703 722 724 744 748<br>779 789 801 819 824 849 884 901 907 918<br>938 944 953 957 974 994 994 1003 1013 1015 1023<br>1024 1031 1040 1045 1056 1058 1072 1078 1081 1089 1115                                                                                                                                                                                                                                                                                                                                                                                                                                                                                                                 |



|             |            |                                                                                                                                                                                                                                                                                                                                                                                                                                                                                                                                                                                                                                                                                                                                                                                                                                                                                                                                                                                                                                                    |
|-------------|------------|----------------------------------------------------------------------------------------------------------------------------------------------------------------------------------------------------------------------------------------------------------------------------------------------------------------------------------------------------------------------------------------------------------------------------------------------------------------------------------------------------------------------------------------------------------------------------------------------------------------------------------------------------------------------------------------------------------------------------------------------------------------------------------------------------------------------------------------------------------------------------------------------------------------------------------------------------------------------------------------------------------------------------------------------------|
|             |            | 1119 1134 1140 1146 1153 1174 1185 1191 1195 1207 1212 1228<br>1237 1245 1249 1285 1297 1313 1314 1327 1344 1353 1358<br>1378 1384 1386 1392 1406 1409 1415 1417 1421 1422 1432<br>1447 1449 1454 1475 1476 1481 1483 1486 1486 1489 1493<br>1493 1500 1502 1504 1512 1517 1525 1533 1568 1577 1595<br>1608 1620 1640 1649 1711 1795 3018 3031 3035 3039 3043<br>3044 3049 3051 3080 3082 3096 3101 3106 3108 3108 3110<br>3113 3115 3125 3134 3139 3153 3167 3174 3196 3197 3200<br>3201 3207 3212 3214 3473                                                                                                                                                                                                                                                                                                                                                                                                                                                                                                                                      |
| <b>INT7</b> |            | 11 14 20 22 27 27 32 33 42 44<br>46 49 53 54 59 68 73 82 90 94<br>100 114 126 132 138 144 149 151 160 162<br>165 166 175 184 198 203 211 221 235 246<br>252 254 256 259 265 267 274 280 282 285<br>310 317 331 341 350 356 372 394 404 413<br>432 444 448 450 488 501 504 526 543 550<br>561 563 572 573 582 583 586 602 618 637<br>644 647 670 674 686 694 699 736 766 779<br>804 811 818 820 824 869 893 896 917 929<br>940 943 947 972 973 978 979 995 998 1011 1014<br>1020 1022 1029 1052 1059 1066 1067 1081 1084 1105 1115<br>1124 1137 1138 1146 1169 1179 1186 1187 1195 1199 1222 1226<br>1238 1246 1255 1261 1303 1306 1315 1323 1335 1362 1363<br>1373 1379 1380 1393 1402 1410 1413 1418 1421 1422 1427<br>1442 1463 1464 1473 1476 1476 1481 1489 1492 1493 1493<br>1494 1499 1501 1504 1512 1518 1528 1530 1560 1569 1613<br>1625 1644 1687 1725 1809 3020 3032 3036 3038 3042 3043<br>3052 3070 3077 3097 3100 3101 3101 3106 3106 3110 3110<br>3110 3113 3114 3131 3142 3149 3156 3157 3172 3176 3179<br>3188 3200 3208 3230 3446 |
| <b>INT7</b> | <b>D3a</b> | 10 17 21 29 32 36 41 44 50 53<br>57 59 62 70 72 80 89 94 103 113<br>114 121 128 135 142 145 152 162 168 172<br>177 178 186 196 204 215 225 234 242 249<br>256 258 260 264 272 276 277 282 288 301<br>315 322 332 338 353 355 371 385 411 413<br>427 446 451 455 492 493 500 505 530 553<br>562 565 572 578 582 582 586 604 627 635<br>647 648 677 686 692 694 697 736 769 780<br>796 813 816 820 825 870 897 900 921 940<br>946 951 966 973 973 978 984 996 997 1012 1013                                                                                                                                                                                                                                                                                                                                                                                                                                                                                                                                                                          |

|                |                                                                                                                                                                                                                                                                                                                                                                                                                                                                                                                                                                                                                                                                                                                                                                                                                                                                                                                                                                                                                                                       |
|----------------|-------------------------------------------------------------------------------------------------------------------------------------------------------------------------------------------------------------------------------------------------------------------------------------------------------------------------------------------------------------------------------------------------------------------------------------------------------------------------------------------------------------------------------------------------------------------------------------------------------------------------------------------------------------------------------------------------------------------------------------------------------------------------------------------------------------------------------------------------------------------------------------------------------------------------------------------------------------------------------------------------------------------------------------------------------|
|                | 1020 1023 1024 1055 1057 1070 1071 1079 1080 1110 1117 1124<br>1137 1141 1150 1175 1182 1184 1185 1194 1202 1227 1228 1240<br>1247 1257 1300 1306 1306 1323 1342 1358 1365 1371 1381<br>1382 1387 1405 1411 1416 1421 1424 1425 1431 1439 1448<br>1458 1467 1474 1477 1481 1484 1489 1492 1494 1497 1500<br>1500 1502 1502 1509 1514 1525 1527 1530 1570 1581 1612<br>1626 1644 1726 1811 3023 3029 3038 3039 3041 3046 3053<br>3075 3082 3092 3097 3102 3102 3105 3107 3108 3109 3118<br>3126 3129 3129 3133 3155 3157 3160 3174 3175 3185 3190<br>3196 3197 3209 3456                                                                                                                                                                                                                                                                                                                                                                                                                                                                               |
| <b>INT7 D3</b> | 9 19 23 28 30 35 40 46 46 50<br>56 59 64 71 76 80 99 105 115 119<br>126 132 141 150 155 161 163 172 175 180<br>182 191 200 204 213 218 225 245 246 254<br>255 258 260 266 268 276 282 287 297 302<br>312 314 325 352 355 360 376 397 418 428<br>431 447 448 462 493 496 497 505 534 555<br>560 566 570 579 582 584 585 608 629 642<br>650 652 679 688 692 699 705 737 774 779<br>811 813 820 823 830 872 898 900 925 942<br>947 954 968 973 975 980 984 999 1001 1015 1017<br>1023 1027 1031 1060 1061 1072 1073 1079 1088 1112 1119 1129<br>1138 1146 1157 1178 1187 1188 1192 1198 1206 1229 1237 1244<br>1247 1266 1292 1313 1320 1332 1338 1361 1367 1376 1380<br>1383 1390 1405 1410 1416 1424 1424 1429 1432 1439 1448<br>1461 1466 1477 1480 1486 1487 1490 1492 1493 1499 1502<br>1502 1503 1506 1511 1520 1525 1533 1535 1573 1575 1619<br>1632 1650 1727 1813 3031 3035 3042 3043 3044 3046 3053<br>3078 3079 3094 3097 3103 3106 3106 3106 3108 3113 3120<br>3129 3133 3134 3157 3160 3168 3172 3179 3181 3188 3192<br>3200 3215 3217 3462 |
| <b>TS6</b>     | -56 16 21 23 26 33 37 42 46 51<br>53 54 60 63 68 76 79 83 86 89<br>95 105 111 116 123 136 149 150 163 172<br>177 182 185 197 201 207 213 216 226 250<br>254 257 259 260 263 275 277 282 286 293<br>297 312 315 330 348 357 363 388 395 410<br>429 448 449 459 484 487 489 504 505 518<br>542 556 572 574 576 577 582 585 602 632<br>637 645 648 668 686 691 694 697 748 770<br>779 804 817 822 833 856 894 909 935 945                                                                                                                                                                                                                                                                                                                                                                                                                                                                                                                                                                                                                                |

|            |     |      |      |      |      |      |      |      |      |      |      |      |
|------------|-----|------|------|------|------|------|------|------|------|------|------|------|
|            |     | 946  | 951  | 967  | 973  | 975  | 981  | 989  | 994  | 997  | 1015 | 1017 |
|            |     | 1020 | 1024 | 1028 | 1056 | 1064 | 1067 | 1071 | 1077 | 1083 | 1102 | 1115 |
|            |     | 1122 | 1136 | 1138 | 1154 | 1164 | 1178 | 1181 | 1185 | 1190 | 1194 | 1218 |
|            |     | 1234 | 1241 | 1251 | 1300 | 1305 | 1311 | 1317 | 1320 | 1327 | 1356 | 1373 |
|            |     | 1377 | 1380 | 1388 | 1398 | 1409 | 1410 | 1420 | 1421 | 1423 | 1425 | 1442 |
|            |     | 1453 | 1464 | 1471 | 1473 | 1475 | 1481 | 1483 | 1491 | 1492 | 1492 | 1497 |
|            |     | 1501 | 1501 | 1504 | 1505 | 1509 | 1520 | 1527 | 1529 | 1540 | 1561 | 1563 |
|            |     | 1616 | 1640 | 1657 | 1713 | 1800 | 3015 | 3031 | 3035 | 3037 | 3042 | 3043 |
|            |     | 3054 | 3076 | 3077 | 3091 | 3092 | 3098 | 3101 | 3104 | 3105 | 3109 | 3110 |
|            |     | 3113 | 3124 | 3127 | 3130 | 3142 | 3147 | 3149 | 3157 | 3170 | 3180 | 3183 |
|            |     | 3191 | 3202 | 3204 | 3224 | 3542 |      |      |      |      |      |      |
| <b>TS6</b> | D3a | -51  | 22   | 26   | 27   | 28   | 32   | 40   | 49   | 50   | 51   |      |
|            |     | 56   | 59   | 63   | 65   | 70   | 80   | 83   | 88   | 94   | 96   |      |
|            |     | 102  | 112  | 115  | 122  | 129  | 140  | 147  | 152  | 161  | 177  |      |
|            |     | 181  | 186  | 188  | 200  | 204  | 211  | 214  | 216  | 226  | 251  |      |
|            |     | 256  | 259  | 261  | 263  | 266  | 277  | 281  | 287  | 291  | 297  |      |
|            |     | 301  | 311  | 320  | 334  | 351  | 360  | 367  | 393  | 404  | 413  |      |
|            |     | 431  | 449  | 452  | 460  | 483  | 487  | 496  | 506  | 511  | 517  |      |
|            |     | 543  | 559  | 572  | 577  | 579  | 579  | 582  | 588  | 604  | 629  |      |
|            |     | 638  | 646  | 652  | 669  | 689  | 694  | 697  | 699  | 745  | 771  |      |
|            |     | 781  | 807  | 819  | 824  | 836  | 858  | 898  | 911  | 935  | 947  |      |
|            |     | 949  | 951  | 970  | 974  | 977  | 986  | 992  | 996  | 1002 | 1018 | 1019 |
|            |     | 1021 | 1027 | 1028 | 1060 | 1066 | 1071 | 1071 | 1080 | 1086 | 1104 | 1118 |
|            |     | 1126 | 1139 | 1142 | 1156 | 1167 | 1180 | 1182 | 1186 | 1192 | 1196 | 1220 |
|            |     | 1236 | 1243 | 1252 | 1304 | 1307 | 1312 | 1320 | 1324 | 1331 | 1356 | 1376 |
|            |     | 1379 | 1382 | 1389 | 1398 | 1409 | 1410 | 1422 | 1422 | 1424 | 1426 | 1444 |
|            |     | 1454 | 1465 | 1470 | 1473 | 1476 | 1483 | 1485 | 1491 | 1492 | 1492 | 1498 |
|            |     | 1501 | 1501 | 1506 | 1508 | 1508 | 1524 | 1529 | 1532 | 1540 | 1564 | 1568 |
|            |     | 1619 | 1642 | 1659 | 1721 | 1805 | 3016 | 3030 | 3034 | 3037 | 3041 | 3044 |
|            |     | 3055 | 3075 | 3082 | 3089 | 3097 | 3097 | 3102 | 3103 | 3104 | 3108 | 3114 |
|            |     | 3118 | 3126 | 3129 | 3137 | 3147 | 3148 | 3157 | 3158 | 3170 | 3183 | 3183 |
|            |     | 3194 | 3210 | 3213 | 3232 | 3560 |      |      |      |      |      |      |
| <b>TS6</b> | D3  | -44  | 18   | 25   | 27   | 35   | 39   | 45   | 47   | 53   | 55   |      |
|            |     | 56   | 66   | 71   | 75   | 81   | 87   | 94   | 102  | 106  | 108  |      |
|            |     | 113  | 113  | 122  | 135  | 139  | 146  | 149  | 160  | 165  | 168  |      |
|            |     | 181  | 187  | 196  | 206  | 212  | 213  | 219  | 224  | 229  | 251  |      |
|            |     | 255  | 257  | 261  | 264  | 267  | 281  | 283  | 285  | 293  | 298  |      |
|            |     | 304  | 313  | 320  | 341  | 356  | 361  | 370  | 395  | 410  | 417  |      |
|            |     | 433  | 446  | 453  | 460  | 485  | 486  | 493  | 504  | 509  | 515  |      |
|            |     | 529  | 561  | 573  | 575  | 576  | 584  | 588  | 589  | 610  | 629  |      |
|            |     | 643  | 649  | 654  | 663  | 693  | 696  | 701  | 702  | 738  | 762  |      |

|                |                                                                                                                                                                                                                                                                                                                                                                                                                                                                                                                                                                                                                                                                                                                                                                                             |
|----------------|---------------------------------------------------------------------------------------------------------------------------------------------------------------------------------------------------------------------------------------------------------------------------------------------------------------------------------------------------------------------------------------------------------------------------------------------------------------------------------------------------------------------------------------------------------------------------------------------------------------------------------------------------------------------------------------------------------------------------------------------------------------------------------------------|
|                | 782 807 824 830 836 862 900 909 926 943<br>949 952 972 974 974 980 990 994 998 1018 1022<br>1022 1027 1030 1065 1067 1071 1076 1082 1088 1105 1119<br>1134 1143 1144 1159 1167 1181 1184 1188 1196 1204 1223 1237<br>1238 1247 1271 1310 1312 1319 1321 1323 1338 1355 1374<br>1379 1384 1390 1396 1409 1410 1421 1422 1424 1426 1443<br>1456 1466 1468 1471 1477 1485 1487 1490 1493 1494 1496<br>1498 1503 1507 1511 1512 1525 1528 1530 1539 1565 1577<br>1618 1643 1664 1725 1808 3017 3033 3038 3041 3042 3043<br>3056 3073 3079 3083 3093 3101 3105 3105 3107 3112 3117<br>3121 3132 3133 3147 3152 3154 3159 3169 3182 3188 3190<br>3200 3210 3222 3239 3572                                                                                                                         |
| <b>TS1-B-N</b> | -85 14 27 37 40 43 53 58 60 63<br>69 80 84 92 95 104 113 124 135 148<br>160 175 181 205 212 217 228 237 249 280<br>282 300 313 320 348 352 355 362 382 407<br>409 424 447 456 457 484 493 511 513 520<br>525 573 630 634 643 671 672 692 696 697<br>724 741 758 822 825 857 867 893 934 946<br>951 954 968 973 975 981 997 1002 1005 1007 1019<br>1020 1023 1027 1048 1053 1059 1071 1082 1100 1103 1109<br>1137 1141 1148 1165 1182 1183 1186 1213 1218 1234 1284 1313<br>1329 1334 1361 1367 1387 1405 1412 1421 1425 1431 1439<br>1453 1467 1477 1479 1480 1491 1493 1495 1499 1502 1506<br>1506 1517 1523 1525 1543 1553 1564 1620 1642 1705 3021<br>3032 3038 3040 3041 3053 3095 3098 3099 3105 3117 3121<br>3133 3134 3156 3163 3165 3176 3180 3185 3192 3202 3204<br>3205 3229 3563 |
| <b>TS1-O</b>   | -106 25 29 34 44 52 53 54 57 61<br>67 68 72 87 98 119 121 123 130 141<br>147 163 172 180 192 217 230 234 240 241<br>266 271 281 309 314 357 357 369 391 416<br>423 428 446 457 480 489 510 522 528 583<br>624 629 636 648 675 677 685 686 696 705<br>725 815 820 844 859 891 908 917 938 941<br>944 951 971 972 989 996 1004 1013 1014 1017 1025<br>1026 1032 1055 1058 1063 1065 1076 1107 1110 1135 1157 1165<br>1175 1180 1182 1187 1206 1221 1235 1302 1303 1329 1331<br>1335 1358 1360 1371 1388 1401 1412 1413 1420 1424 1430<br>1455 1466 1468 1472 1477 1480 1480 1482 1485 1488 1491<br>1495 1504 1511 1512 1526 1529 1561 1571 1611 1616 1639                                                                                                                                     |

|                                       |                                                                                                                                                                                                                                                                                                                                                                                                                                                                                                                                                                                                                                                                                                                                                                                                                             |
|---------------------------------------|-----------------------------------------------------------------------------------------------------------------------------------------------------------------------------------------------------------------------------------------------------------------------------------------------------------------------------------------------------------------------------------------------------------------------------------------------------------------------------------------------------------------------------------------------------------------------------------------------------------------------------------------------------------------------------------------------------------------------------------------------------------------------------------------------------------------------------|
|                                       | 1643 1666 3027 3032 3034 3035 3038 3045 3047 3090 3095<br>3099 3104 3106 3107 3107 3110 3136 3137 3138 3144 3160<br>3167 3176 3184 3185 3200 3221 3222 3237 3575                                                                                                                                                                                                                                                                                                                                                                                                                                                                                                                                                                                                                                                            |
| <b>TS1-O-N</b>                        | -73 14 32 35 41 46 50 53 53 59<br>63 67 73 92 95 110 127 130 147 148<br>161 172 177 179 183 209 228 238 241 245<br>264 277 285 317 324 352 359 379 392 416<br>421 441 445 447 494 517 525 530 573 618<br>621 635 636 659 669 680 684 691 701 719<br>773 821 825 850 869 895 922 929 939 945<br>947 963 972 974 996 1006 1009 1011 1019 1023 1030<br>1031 1033 1054 1058 1062 1066 1080 1106 1107 1134 1149 1160<br>1168 1180 1182 1183 1211 1220 1238 1305 1310 1324 1334 1339<br>1359 1361 1368 1389 1401 1403 1408 1413 1419 1428 1456<br>1464 1466 1475 1476 1476 1480 1485 1489 1492 1498 1502<br>1507 1510 1512 1530 1531 1563 1566 1616 1623 1642 1653<br>1671 3027 3033 3033 3036 3046 3048 3048 3090 3096 3099<br>3100 3103 3104 3107 3115 3141 3141 3143 3163 3168 3174<br>3184 3186 3197 3200 3201 3202 3215 3359 |
| <b>DMF</b> D3a<br>DMF solvent         | 121 171 242 321 346 401 660 870 1027 1077<br>1103 1129 1176 1272 1420 1436 1441 1470 1476 1495 1501<br>1538 1704 2967 3020 3026 3069 3074 3121 3152                                                                                                                                                                                                                                                                                                                                                                                                                                                                                                                                                                                                                                                                         |
| <b>1a</b> D3a<br>DMF solvent          | 43 75 109 152 222 300 354 411 415 456<br>515 636 687 709 724 818 844 863 953 1000 1015<br>1019 1026 1054 1106 1147 1175 1181 1183 1204 1308 1335 1358<br>1449 1477 1481 1504 1528 1562 1619 1644 1673 3033 3091<br>3133 3158 3165 3173 3182 3192 3556                                                                                                                                                                                                                                                                                                                                                                                                                                                                                                                                                                       |
| <b>CAT</b> D3a<br>DMF solvent         | 28 41 41 44 49 52 67 72 99 111<br>121 149 159 174 180 183 192 204 213 232<br>247 251 255 262 264 267 273 299 305 315<br>332 357 406 411 415 450 458 489 499 510<br>533 564 572 584 588 596 623 649 677 699<br>702 822 896 930 945 948 968 973 985 1005 1014<br>1018 1027 1063 1070 1082 1111 1139 1170 1187 1224 1239 1313<br>1338 1364 1386 1404 1417 1423 1427 1429 1436 1463 1478<br>1487 1488 1492 1499 1505 1505 1511 1514 1542 1569 3030<br>3033 3039 3040 3052 3098 3102 3103 3105 3110 3116 3131<br>3151 3181 3192 3201 3225                                                                                                                                                                                                                                                                                        |
| <b>COM1-DMF</b><br>D3a<br>DMF solvent | 11 16 31 41 48 51 54 60 64 69<br>73 76 87 102 105 115 153 160 164 168<br>174 182 183 188 202 211 227 240 247 252                                                                                                                                                                                                                                                                                                                                                                                                                                                                                                                                                                                                                                                                                                            |

|                                       |                                                                                                                                                                                                                                                                                                                                                                                                                                                                                                                                                                                                                                                                                                                                                                                                                                                                                                                                                                                                 |
|---------------------------------------|-------------------------------------------------------------------------------------------------------------------------------------------------------------------------------------------------------------------------------------------------------------------------------------------------------------------------------------------------------------------------------------------------------------------------------------------------------------------------------------------------------------------------------------------------------------------------------------------------------------------------------------------------------------------------------------------------------------------------------------------------------------------------------------------------------------------------------------------------------------------------------------------------------------------------------------------------------------------------------------------------|
|                                       | 258 259 261 267 269 273 285 291 306 333<br>355 386 392 399 415 416 428 445 453 495<br>500 502 528 568 569 570 574 585 625 647<br>674 694 700 705 817 877 898 921 944 949 966<br>976 988 1002 1008 1021 1023 1062 1070 1070 1075 1081 1110<br>1134 1136 1140 1174 1181 1186 1229 1245 1267 1310 1344 1369<br>1386 1403 1419 1422 1423 1425 1429 1442 1449 1457 1465<br>1474 1482 1485 1487 1489 1491 1496 1500 1501 1503 1509<br>1511 1522 1528 1539 1571 1677 3031 3034 3035 3037 3043<br>3049 3087 3092 3093 3096 3098 3109 3113 3115 3119 3124<br>3132 3147 3154 3170 3175 3176 3218 3223                                                                                                                                                                                                                                                                                                                                                                                                     |
| <b>TS1a-DMF</b><br>D3a<br>DMF solvent | -105 17 17 26 29 33 37 39 45 50<br>52 56 60 64 65 72 76 79 88 94<br>108 114 119 125 134 143 146 155 163 166<br>171 171 176 178 182 189 214 225 238 241<br>256 258 259 260 262 268 270 271 275 276<br>311 317 353 359 375 390 396 409 416 419<br>424 426 445 457 481 496 503 527 531 564<br>569 573 577 583 627 636 649 673 677 682<br>697 698 701 721 739 817 820 855 877 882<br>896 926 940 942 954 974 978 984 997 1010 1020<br>1021 1024 1025 1027 1031 1035 1057 1060 1067 1075 1077<br>1112 1114 1129 1133 1140 1148 1169 1178 1180 1184 1185<br>1197 1213 1227 1240 1269 1311 1327 1333 1343 1363 1373<br>1378 1402 1405 1417 1419 1424 1426 1433 1446 1448 1454<br>1465 1468 1473 1477 1480 1483 1484 1487 1490 1492 1495<br>1497 1498 1505 1507 1511 1532 1536 1537 1572 1596 1600<br>1618 1646 1655 1674 3027 3031 3033 3036 3036 3042 3042<br>3047 3091 3092 3096 3097 3098 3100 3106 3109 3114 3120<br>3136 3136 3142 3149 3159 3170 3170 3180 3181 3184 3197<br>3203 3212 3224 3542 |
| <b>INT1</b> D3a<br>DMF solvent        | 10 17 37 43 48 51 55 59 61 62<br>67 68 81 82 95 105 115 127 139 146<br>165 169 171 172 180 187 196 200 227 232<br>244 257 259 261 264 268 270 271 283 287<br>298 329 349 358 371 394 398 415 420 437<br>448 457 491 493 504 535 545 563 574 576<br>580 585 626 635 648 681 692 694 695 706<br>713 746 811 819 874 876 895 920 937 941<br>965 969 973 981 992 1012 1013 1020 1021 1023 1024<br>1028 1056 1056 1069 1079 1115 1115 1135 1148 1170 1182 1183                                                                                                                                                                                                                                                                                                                                                                                                                                                                                                                                       |

|                                                      |                                                                                                                                                                                                                                                                                                                                                                                                                                                                                                                                                                                                                          |
|------------------------------------------------------|--------------------------------------------------------------------------------------------------------------------------------------------------------------------------------------------------------------------------------------------------------------------------------------------------------------------------------------------------------------------------------------------------------------------------------------------------------------------------------------------------------------------------------------------------------------------------------------------------------------------------|
|                                                      | 1186 1204 1214 1223 1237 1309 1331 1338 1361 1368 1376<br>1386 1402 1418 1420 1424 1430 1441 1449 1465 1475 1483<br>1485 1488 1489 1491 1497 1499 1501 1501 1510 1524 1536<br>1541 1570 1587 1616 1634 1645 3027 3030 3036 3037 3047<br>3049 3093 3098 3099 3101 3111 3112 3119 3140 3146 3162<br>3162 3173 3178 3182 3191 3193 3203 3203 3208 3501                                                                                                                                                                                                                                                                      |
| <b>1a</b> D3a<br>CH <sub>3</sub> CN solvent          | 44 72 108 150 220 299 354 411 415 459<br>516 636 686 709 724 818 843 863 953 1000 1015<br>1018 1026 1054 1105 1147 1175 1181 1183 1204 1308 1334 1358<br>1449 1477 1481 1504 1527 1562 1618 1643 1673 3035 3094<br>3136 3162 3169 3177 3186 3196 3559                                                                                                                                                                                                                                                                                                                                                                    |
| CH <sub>3</sub> CN D3a<br>CH <sub>3</sub> CN solvent | 386 386 925 1058 1058 1407 1464 1464 2354 3050 3121<br>3121                                                                                                                                                                                                                                                                                                                                                                                                                                                                                                                                                              |
| <b>CAT</b> D3a<br>CH <sub>3</sub> CN solvent         | 29 41 41 44 49 52 67 72 99 111<br>121 149 159 174 180 183 192 204 213 232<br>247 251 255 262 264 267 273 299 305 315<br>332 357 406 411 415 450 458 489 499 510<br>533 564 572 584 588 596 623 649 677 699<br>702 822 896 930 945 948 968 973 985 1005 1014<br>1018 1027 1063 1070 1082 1111 1139 1170 1187 1224 1239 1313<br>1338 1364 1386 1404 1417 1423 1427 1429 1436 1463 1478<br>1487 1488 1492 1499 1505 1505 1512 1514 1542 1569 3030<br>3033 3039 3040 3052 3098 3102 3103 3105 3110 3116 3131<br>3151 3181 3192 3201 3225                                                                                     |
| <b>COM1-CCN</b><br>D3a<br>CH <sub>3</sub> CN solvent | 16 28 35 39 44 54 57 60 61 69<br>89 95 115 119 143 151 166 172 174 179<br>189 200 215 230 239 247 256 256 260 264<br>267 272 275 284 292 312 328 356 376 403<br>429 436 444 450 462 497 500 502 524 565<br>569 574 577 582 629 647 667 695 696 818<br>898 918 937 944 962 967 975 995 1011 1021 1023<br>1043 1056 1061 1063 1071 1080 1113 1141 1175 1192 1227 1249<br>1319 1350 1369 1388 1404 1408 1417 1422 1424 1432 1441<br>1456 1465 1469 1475 1485 1486 1492 1500 1502 1506 1510<br>1523 1540 1573 2398 3028 3032 3037 3044 3049 3082 3091<br>3100 3106 3107 3109 3113 3119 3125 3131 3148 3186 3191<br>3205 3221 |
| <b>TS1-CCN</b><br>D3a<br>CH <sub>3</sub> CN solvent  | -99 13 23 30 31 35 37 42 47 51<br>56 62 63 65 78 83 89 97 100 110<br>117 128 139 144 151 157 164 165 168 169                                                                                                                                                                                                                                                                                                                                                                                                                                                                                                             |

|                            |      |      |      |      |      |      |      |      |      |      |
|----------------------------|------|------|------|------|------|------|------|------|------|------|
|                            | 173  | 178  | 188  | 200  | 207  | 225  | 235  | 239  | 253  | 256  |
|                            | 258  | 259  | 267  | 268  | 270  | 270  | 274  | 311  | 318  | 353  |
|                            | 360  | 390  | 403  | 409  | 420  | 423  | 425  | 430  | 446  | 456  |
|                            | 472  | 500  | 504  | 526  | 535  | 569  | 570  | 574  | 576  | 586  |
|                            | 602  | 630  | 636  | 651  | 673  | 683  | 687  | 696  | 713  | 737  |
|                            | 822  | 824  | 855  | 867  | 897  | 928  | 934  | 944  | 955  | 958  |
|                            | 965  | 972  | 973  | 1002 | 1006 | 1012 | 1020 | 1023 | 1025 | 1028 |
|                            | 1053 | 1057 | 1060 | 1060 | 1072 | 1076 | 1110 | 1110 | 1135 | 1146 |
|                            | 1184 | 1185 | 1196 | 1210 | 1227 | 1242 | 1309 | 1330 | 1334 | 1348 |
|                            | 1369 | 1386 | 1402 | 1412 | 1413 | 1420 | 1426 | 1430 | 1447 | 1448 |
|                            | 1468 | 1472 | 1479 | 1481 | 1485 | 1488 | 1489 | 1491 | 1500 | 1502 |
|                            | 1510 | 1513 | 1528 | 1533 | 1547 | 1561 | 1595 | 1598 | 1636 | 1645 |
|                            | 3029 | 3036 | 3037 | 3043 | 3046 | 3049 | 3054 | 3092 | 3097 | 3100 |
|                            | 3102 | 3116 | 3117 | 3124 | 3128 | 3131 | 3143 | 3143 | 3161 | 3173 |
|                            | 3187 | 3188 | 3206 | 3207 | 3216 | 3216 | 3562 |      |      |      |
| <b>TS1a-CCN</b>            | -112 | 9    | 21   | 26   | 36   | 38   | 38   | 41   | 43   | 47   |
| D3a                        | 51   | 55   | 58   | 59   | 63   | 67   | 74   | 77   | 86   | 91   |
| CH <sub>3</sub> CN solvent | 108  | 120  | 125  | 126  | 149  | 150  | 156  | 167  | 170  | 175  |
|                            | 178  | 181  | 212  | 216  | 234  | 236  | 238  | 247  | 257  | 259  |
|                            | 261  | 264  | 267  | 270  | 270  | 274  | 276  | 300  | 315  | 352  |
|                            | 357  | 363  | 391  | 411  | 422  | 425  | 443  | 450  | 456  | 466  |
|                            | 487  | 496  | 503  | 530  | 531  | 564  | 571  | 577  | 577  | 584  |
|                            | 625  | 635  | 650  | 659  | 676  | 685  | 686  | 698  | 719  | 736  |
|                            | 817  | 818  | 853  | 879  | 895  | 925  | 942  | 944  | 953  | 956  |
|                            | 973  | 973  | 987  | 1003 | 1013 | 1019 | 1020 | 1026 | 1027 | 1029 |
|                            | 1053 | 1054 | 1057 | 1058 | 1068 | 1077 | 1111 | 1112 | 1140 | 1156 |
|                            | 1183 | 1186 | 1196 | 1211 | 1227 | 1241 | 1309 | 1326 | 1335 | 1342 |
|                            | 1371 | 1375 | 1402 | 1405 | 1418 | 1418 | 1421 | 1425 | 1433 | 1450 |
|                            | 1456 | 1465 | 1472 | 1478 | 1479 | 1482 | 1487 | 1489 | 1491 | 1496 |
|                            | 1508 | 1512 | 1534 | 1535 | 1576 | 1586 | 1607 | 1618 | 1645 | 1660 |
|                            | 3029 | 3031 | 3034 | 3036 | 3042 | 3047 | 3048 | 3086 | 3093 | 3098 |
|                            | 3109 | 3110 | 3115 | 3120 | 3121 | 3135 | 3142 | 3150 | 3160 | 3171 |
|                            | 3181 | 3188 | 3198 | 3207 | 3210 | 3221 | 3545 |      |      |      |
| <b>TS1b-CCN</b>            | -142 | 12   | 13   | 16   | 20   | 24   | 26   | 32   | 36   | 41   |
| D3a                        | 48   | 49   | 51   | 54   | 63   | 68   | 74   | 78   | 87   | 95   |
| CH <sub>3</sub> CN solvent | 100  | 118  | 120  | 123  | 143  | 152  | 156  | 162  | 165  | 170  |
|                            | 170  | 178  | 185  | 195  | 220  | 230  | 243  | 251  | 256  | 258  |
|                            | 260  | 263  | 263  | 270  | 275  | 277  | 282  | 317  | 350  | 355  |
|                            | 362  | 385  | 397  | 400  | 407  | 418  | 422  | 433  | 440  | 451  |
|                            | 490  | 496  | 504  | 526  | 540  | 564  | 571  | 577  | 578  | 585  |
|                            | 626  | 635  | 646  | 667  | 682  | 690  | 696  | 701  | 715  | 736  |



|                                                  |                                                                                                                                                                                                                                                                                                                                                                                                                                                                                                                                                                                                                                                                                                                                                                                                                 |
|--------------------------------------------------|-----------------------------------------------------------------------------------------------------------------------------------------------------------------------------------------------------------------------------------------------------------------------------------------------------------------------------------------------------------------------------------------------------------------------------------------------------------------------------------------------------------------------------------------------------------------------------------------------------------------------------------------------------------------------------------------------------------------------------------------------------------------------------------------------------------------|
|                                                  | 811 818 873 876 897 917 931 938 942 951<br>970 975 985 1001 1013 1014 1021 1024 1026 1026 1029<br>1054 1056 1057 1058 1068 1082 1110 1113 1139 1148 1173 1182<br>1185 1187 1205 1211 1226 1240 1313 1330 1337 1360 1368<br>1369 1373 1402 1407 1415 1418 1421 1424 1425 1451 1462<br>1462 1463 1476 1477 1479 1483 1489 1493 1494 1501 1505<br>1510 1517 1527 1533 1566 1600 1608 1619 1634 1645 2373<br>3025 3028 3036 3038 3046 3048 3049 3090 3095 3100 3102<br>3105 3107 3121 3121 3124 3142 3145 3146 3163 3174 3181<br>3184 3198 3204 3205 3208 3215 3498                                                                                                                                                                                                                                                 |
| <b>INT1</b><br>D3a<br>CH <sub>3</sub> CN solvent | 6 15 36 42 47 49 56 57 60 63<br>67 68 81 82 95 106 116 127 138 146<br>165 169 171 172 180 187 196 200 227 233<br>245 258 259 261 264 268 270 271 283 288<br>298 328 348 358 371 395 398 416 420 437<br>448 457 491 493 504 535 546 563 573 576<br>580 585 626 635 648 681 692 694 696 707<br>714 746 811 819 874 876 895 920 937 941<br>965 970 973 980 992 1011 1013 1020 1020 1022 1024<br>1028 1056 1057 1069 1079 1114 1115 1134 1148 1169 1182 1183<br>1186 1204 1214 1223 1237 1308 1331 1338 1360 1369 1376<br>1386 1402 1418 1420 1424 1430 1441 1449 1465 1475 1483<br>1485 1487 1489 1491 1497 1499 1501 1502 1510 1524 1536<br>1542 1570 1587 1616 1634 1645 3027 3031 3036 3038 3047<br>3049 3094 3099 3099 3102 3110 3113 3119 3140 3147 3162<br>3164 3175 3179 3184 3192 3194 3203 3204 3208 3500 |
